# Supplementary material for: Organocatalytic cascade Michael/Michael reaction for the asymmetric synthesis of spirooxindoles containing five contiguous stereocenters
Source: Royal Society of Chemistry journal article supplement (doi:10.1039/c6cc00705h), 2016-01-01
Supplement: c6cc00705h1.pdf [file c6cc00705h1.pdf]

# Organocatalytic Cascade Michael/Michael Reaction for the Asymmetric Synthesis of Spirocyclic Oxindoles Containing Five Contiguous Stereocenters

Bo-Liang Zhao and Da-Ming Du\*

*School of Chemical Engineering and Environment, Beijing Institute of Technology,  
Beijing 100081, People's Republic of China*  
[dudm@bit.edu.cn](mailto:dudm@bit.edu.cn)

## *Supporting Information*

### **Contents**

|                                                                                                                         |     |
|-------------------------------------------------------------------------------------------------------------------------|-----|
| General information.....                                                                                                | S1  |
| Materials.....                                                                                                          | S1  |
| General procedure organocatalytic enantioselective cascade Michael/Michael reactions.....                               | S2  |
| Gram-scale asymmetric cascade Michael/Michael reaction of $\alpha$ -alkylidene succinimide <b>2d</b> to <b>1b</b> ..... | S15 |
| One-pot four-component reaction for the synthesis of <b>3b</b> .....                                                    | S15 |
| Synthetic transformation of Michael/Michael adduct <b>3b</b> .....                                                      | S15 |
| References.....                                                                                                         | S19 |
| Copies of $^1\text{H}$ and $^{13}\text{C}$ NMR spectra of new compounds.....                                            | S20 |
| Copies of HPLC chromatograms.....                                                                                       | S68 |

## General information

**General Methods:** Commercially available compounds were used without further purification. Solvents were dried according to standard procedures. Column chromatography was performed with silica gel (200–300 mesh). Melting points were determined with an XT-4 melting-point apparatus and are uncorrected.  $^1\text{H}$  NMR spectra were measured with a Bruker Avance 400 MHz spectrometer. Chemical shifts were reported in  $\delta$  (ppm) units relative to tetramethylsilane (TMS) as the internal standard.  $^{13}\text{C}$  NMR spectra were measured at 100 MHz; chemical shifts were reported in ppm relative to TMS with the solvent resonance as internal standard. Infrared spectra were obtained with a Perkin Elmer Spectrum One spectrometer. High resolution mass spectra (Electron spray ionization) were measured with a Bruker APEX IV Fourier-Transform mass spectrometer or an Agilent 6520 Accurate-Mass-Q-TOF MS system equipped with an electrospray ionization (*ESI*) source. Optical rotations were measured with a WZZ-3 polarimeter. Enantiomeric excesses were determined by chiral HPLC analysis using an Agilent 1200 LC instrument with a Daicel Chiralpak IA, IB or AD-H column.

## Materials

Chiral squaramide catalysts **I**, **II**, **IV**, **V**, **VIII** and **IX**,<sup>1</sup> **III**,<sup>2</sup> **VI** and **VII**,<sup>3</sup> and chiral thiourea catalyst **X**<sup>4</sup> were prepared according to the reported procedures.

$\alpha$ -Alkylidene succinimides **2** were prepared following modification of literatures protocol.<sup>5</sup>

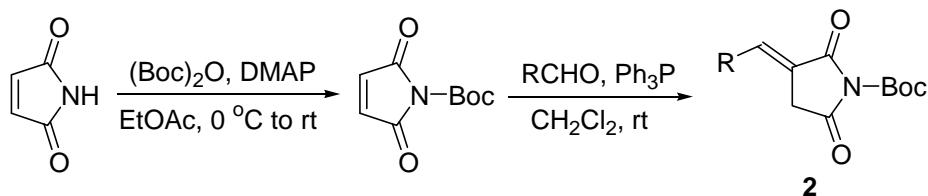

Maleimide (0.97 g, 10.0 mmol), 4-(dimethylamino)pyridine (122 mg, 1.0 mmol) and EtOAc (50 mL) were added in a dry 100 mL round-bottom flask, equipped with a stir bar. The reaction vessel was cooled to  $0\text{ }^\circ\text{C}$  on an ice bath. Di-*tert*-butyl dicarbonate (3.27 g, 15.0 mmol) was added dropwise at  $0\text{ }^\circ\text{C}$  over a period of 20 min into the stirred reaction mixture. After the addition was complete, the reaction mixture was allowed to stir at ambient temperature until TLC analysis indicated full conversion of starting material (about 20 h). The solvent was removed under reduced pressure and the mixture was purified by flash column chromatography (with  $\text{CH}_2\text{Cl}_2$  as eluant) to yield the *N*-Boc protected maleimide. The *N*-Boc protected maleimide (394 mg, 2.0 mmol), triphenylphosphine (577 mg, 2.2 mmol) and corresponding aldehyde (2.4 mmol), were dissolved in anhydrous  $\text{CH}_2\text{Cl}_2$  (5 mL) and stirred at room temperature for 24 h. The solvent was removed in vacuo and purification of the crude product by flash column chromatography yielded the  $\alpha$ -alkylidene succinimides **2**.

### General procedure for the synthesis of the racemates of **3**

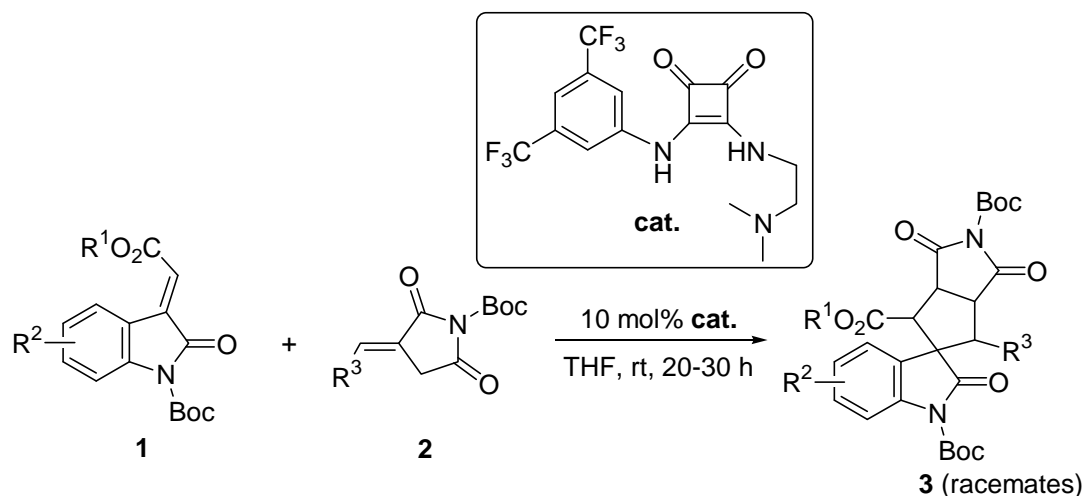

To a dried small bottle were added **2** (0.1 mmol), **cat.** (4.0 mg, 0.01 mmol) and 0.5 ml THF. The mixture was stirred at room temperature for 15 min, and **1** was then added. After stirring at room temperature for 20–30 h, the reaction mixture was concentrated and directly purified by silica gel column chromatography to afford the racemates of **3**.

### General procedure for organocatalytic enantioselective cascade Michael/Michael reaction

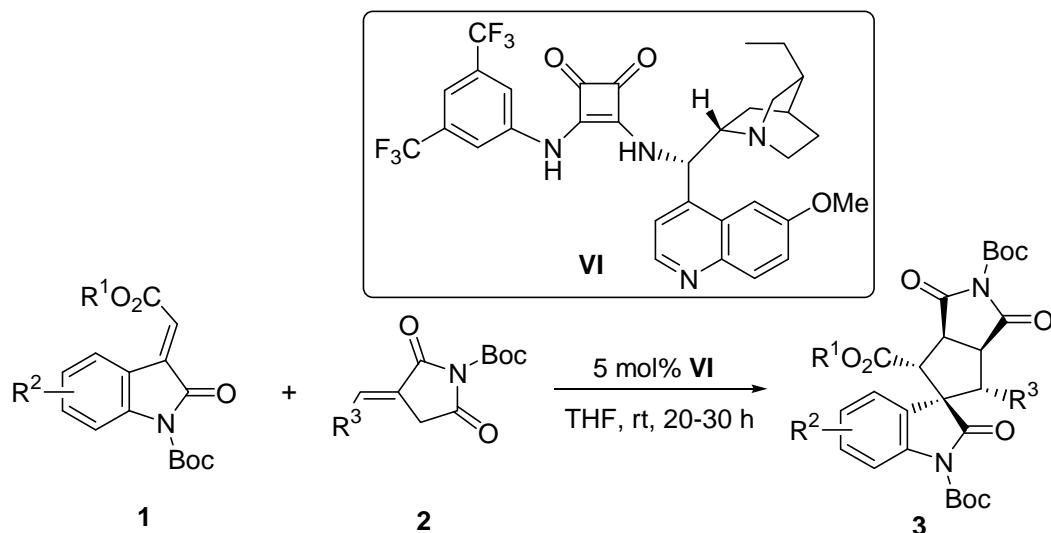

To a dried small bottle were added **2** (0.2 mmol) and catalyst **VI** (6.3 mg, 0.01 mmol, 5 mol %) in THF (1.0 mL). The mixture was stirred at room temperature for 15 min, and **1** (0.22 mmol) was then added. After stirring at room temperature for 20–30 h, the **2** was completely consumed as detected by TLC analysis (petroleum ether/EtOAc 4:1). After that, the reaction mixture was concentrated and directly purified by silica gel column chromatography to afford the desired product **3**.

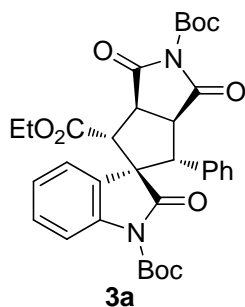

**(3aS,3'R,4R,6R,6aS)-1',2-Di-tert-butyl 4-ethyl 1,2',3-trioxo-6-phenyl-3a,4,6,6a-tetrahydro-1H-spiro[cyclopenta[c]pyrrole-5,3'-indoline]-1',2,4(3H)-tricarboxylate (3a):**

The title compound **3a** was obtained according to the general procedure as a colorless solid (100.2 mg, 83% yield). HPLC (Daicel Chiralpak IA, *n*-hexane/2-propanol = 70:30, flow rate 1.0 mL/min, detection at 254 nm): major diastereomer:  $t_{\text{minor}} = 7.7$  min,  $t_{\text{major}} = 20.0$  min; minor diastereomer:  $t_{\text{R}} = 8.3, 11.1$  min; 86:14 dr, 98% *ee*. M.p. 108–109 °C;  $[\alpha]_{\text{D}}^{25} -79.3$  (*c* 3.99, CH<sub>2</sub>Cl<sub>2</sub>); <sup>1</sup>H NMR (400 MHz, CDCl<sub>3</sub>):  $\delta$  7.56 (d,  $J = 8.0$  Hz, 1H, ArH), 7.21 (t,  $J = 7.6$  Hz, 1H, ArH), 7.17–7.08 (m, 3H, ArH), 7.04 (t,  $J = 7.4$  Hz, 2H, ArH), 6.93 (d,  $J = 7.6$  Hz, 2H, ArH), 4.42 (dd,  $J_1 = 9.4$  Hz,  $J_2 = 7.8$  Hz, 1H, CH), 4.06 (t,  $J = 12.0$  Hz, 1H, CH), 4.03 (d,  $J = 7.6$  Hz, 1H, CH), 3.94 (d,  $J = 11.6$  Hz, 1H, CH), 3.86–3.78 (m, 1H, CH<sub>2</sub>), 3.74–3.66 (m, 1H, CH<sub>2</sub>), 1.59 (s, 9H, CH<sub>3</sub>), 1.58 (s, 9H, CH<sub>3</sub>), 0.66 (t,  $J = 7.0$  Hz, 1H, CH<sub>3</sub>) ppm; <sup>13</sup>C NMR (100 MHz, CDCl<sub>3</sub>):  $\delta$  174.4, 172.9, 171.2, 168.4, 148.3, 145.9, 139.7, 132.2, 129.4, 128.2, 128.1, 127.6, 124.4, 124.1, 123.5, 115.1, 86.5, 84.6, 65.5, 61.5, 59.0, 53.6, 47.7, 45.8, 27.9, 27.7, 13.2 ppm; IR (KBr):  $\bar{\nu}$  3061, 2982, 2935, 1768, 1730, 1607, 1481, 1466, 1395, 1371, 1348, 1310, 1286, 1256, 1150, 1102, 1032, 842, 757, 737, 700, 634 cm<sup>-1</sup>; HRMS (ESI): *m/z* calcd. for C<sub>33</sub>H<sub>40</sub>N<sub>3</sub>O<sub>9</sub> [M + NH<sub>4</sub>]<sup>+</sup> 622.27591, found 622.27658; calcd. for C<sub>33</sub>H<sub>36</sub>N<sub>2</sub>NaO<sub>9</sub> [M + Na]<sup>+</sup> 627.23130, found 627.23228.

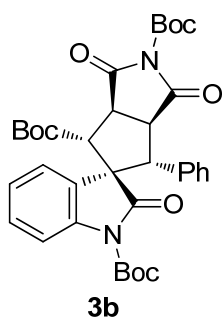

**(3aS,3'R,4R,6R,6aS)-Tri-tert-butyl 1,2',3-trioxo-6-phenyl-3a,4,6,6a-tetrahydro-1H-spiro[cyclopenta[c]pyrrole-5,3'-indoline]-1',2,4(3H)-tricarboxylate (3b):**

The title compound **3b** was obtained according to the general procedure as a colorless solid (115.0 mg, 91% yield). HPLC (Daicel Chiralpak IA, *n*-hexane/2-propanol = 70:30, flow rate 1.0 mL/min, detection at 254 nm): major diastereomer:  $t_{\text{minor}} = 5.6$  min,  $t_{\text{major}} = 20.5$  min; minor diastereomer:  $t_{\text{R}} = 8.0, 11.9$  min; 93:7 dr, 93% *ee*. M.p. 116–117 °C;  $[\alpha]_{\text{D}}^{25} -91.0$  (*c* 4.04, CH<sub>2</sub>Cl<sub>2</sub>); <sup>1</sup>H NMR (400 MHz, CDCl<sub>3</sub>):  $\delta$  7.61 (d,  $J = 8.0$  Hz, 1H, ArH), 7.24–7.20 (m, 1H,

ArH), 7.17 (dd,  $J_1 = 7.6$  Hz,  $J_2 = 1.2$  Hz, 1H, ArH), 7.13 (d,  $J_1 = 6.8$  Hz,  $J_2 = 0.8$  Hz, 1H, ArH), 7.10–7.02 (m, 3H, ArH), 6.93 (d,  $J = 6.8$  Hz, 2H, ArH), 4.34 (dd,  $J_1 = 9.8$  Hz,  $J_2 = 7.8$  Hz, 1H, CH), 4.04 (dd,  $J_1 = 11.8$  Hz,  $J_2 = 9.8$  Hz, 1H, CH), 3.96–3.91 (m, 2H, 2CH), 1.58 (s, 18H, CH<sub>3</sub>), 0.94 (s, 9H, CH<sub>3</sub>) ppm; <sup>13</sup>C NMR (100 MHz, CDCl<sub>3</sub>):  $\delta$  174.4, 173.0, 171.3, 167.2, 148.4, 146.0, 139.9, 132.4, 129.3, 128.11, 128.08, 127.7, 125.0, 124.1, 123.7, 115.0, 86.4, 84.5, 82.5, 65.4, 58.8, 54.6, 47.8, 45.6, 27.9, 27.7, 27.0 ppm; IR (KBr):  $\tilde{\nu}$  2981, 2935, 1792, 1769, 1732, 1607, 1481, 1466, 1395, 1370, 1350, 1309, 1289, 1255, 1151, 1101, 842, 761, 737, 699, 633 cm<sup>-1</sup>; HRMS (ESI):  $m/z$  calcd. for C<sub>35</sub>H<sub>44</sub>N<sub>3</sub>O<sub>9</sub> [M + NH<sub>4</sub>]<sup>+</sup> 650.30721, found 650.30659; calcd. for C<sub>35</sub>H<sub>40</sub>N<sub>2</sub>NaO<sub>9</sub> [M + Na]<sup>+</sup> 655.26260, found 655.26259.

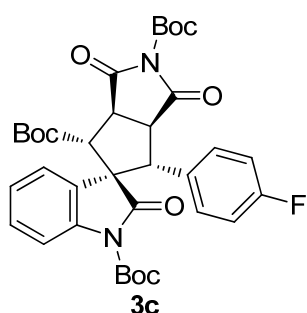

**(3a*S*,3'*R*,4*R*,6*R*,6a*S*)- Tri-*tert*-butyl 6-(4-fluorophenyl)-1,2',3-trioxo-3a,4,6,6a-tetrahydro-1*H*-spiro[cyclopenta[*c*]pyrrole-5,3'-indoline]-1',2,4(3*H*)-tricarboxylate (3c):** The title compound **3c** was obtained according to the general procedure as a colorless solid (110.4 mg, 85% yield). HPLC (Daicel Chiralpak IA, *n*-hexane/2-propanol = 70:30, flow rate 1.0 mL/min, detection at 254 nm): major diastereomer:  $t_{\text{minor}} = 5.6$  min,  $t_{\text{major}} = 20.1$  min; minor diastereomer:  $t_{\text{R}} = 9.3, 15.8$  min; 94:6 dr, 88% *ee*. M.p. 118–119 °C;  $[\alpha]_{\text{D}}^{25} -79.0$  (*c* 1.76, CH<sub>2</sub>Cl<sub>2</sub>); <sup>1</sup>H NMR (400 MHz, CDCl<sub>3</sub>):  $\delta$  7.64 (d,  $J = 8.0$  Hz, 1H, ArH), 7.27–7.23 (m, 1H, ArH), 7.18–7.12 (m, 2H, ArH), 6.92 (d,  $J = 8.8$  Hz, 1H, ArH), 6.91 (d,  $J = 8.8$  Hz, 1H, ArH), 6.75 (t,  $J = 8.8$  Hz, 2H, ArH), 4.34 (dd,  $J_1 = 9.4$  Hz,  $J_2 = 7.8$  Hz, 1H, CH), 3.98 (dd,  $J_1 = 12.0$  Hz,  $J_2 = 9.6$  Hz, 1H, CH), 3.93 (d,  $J = 8.0$  Hz, 1H, CH), 3.89 (d,  $J = 12.0$  Hz, 1H, CH), 1.59 (s, 9H, CH<sub>3</sub>), 1.58 (s, 9H, CH<sub>3</sub>), 0.94 (s, 9H, CH<sub>3</sub>) ppm; <sup>13</sup>C NMR (100 MHz, CDCl<sub>3</sub>):  $\delta$  174.3, 172.9, 171.3, 167.1, 162.4 (d,  $^1J_{\text{C-F}} = -245.9$  Hz), 148.3, 145.9, 139.9, 129.5, 129.4 (d,  $^3J_{\text{C-F}} = 8.2$  Hz), 128.3 (d,  $^4J_{\text{C-F}} = 3.2$  Hz), 124.8, 124.2, 123.6, 115.14, 115.13 (d,  $^2J_{\text{C-F}} = 21.4$  Hz), 86.5, 84.7, 82.5, 65.3, 58.0, 54.5, 48.1, 45.5, 27.9, 27.7, 27.0 ppm; IR (KBr):  $\tilde{\nu}$  3058, 2981, 2934, 1793, 1769, 1733, 1607, 1514, 1481, 1465, 1395, 1371, 1351, 1310, 1255, 1151, 1098, 842, 804, 759, 738, 631 cm<sup>-1</sup>; HRMS (ESI):  $m/z$  calcd. for C<sub>35</sub>H<sub>43</sub>FN<sub>3</sub>O<sub>9</sub> [M + NH<sub>4</sub>]<sup>+</sup> 668.29778, found 668.29774; calcd. for C<sub>35</sub>H<sub>39</sub>FN<sub>2</sub>NaO<sub>9</sub> [M + Na]<sup>+</sup> 673.25318, found 673.25288.

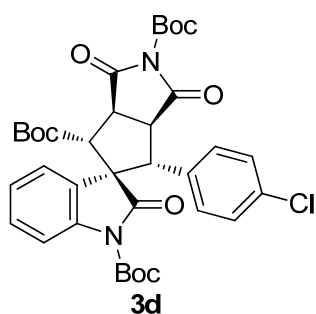

**(3a*S*,3'*R*,4*R*,6*R*,6a*S*)-Tri-*tert*-butyl 6-(4-chlorophenyl)-1,2',3-trioxo-3a,4,6,6a-tetrahydro-1*H*-spiro[cyclopenta[*c*]pyrrole-5,3'-indoline]-1',2,4(3*H*)-tricarboxylate (3d):** The title compound **3d** was obtained according to the general procedure as a colorless solid (115.8 mg, 87% yield). HPLC (Daicel Chiralpak AD-H, *n*-hexane/2-propanol = 70:30, flow rate 1.0 mL/min, detection at 254 nm): major diastereomer:  $t_{\text{minor}} = 5.7$  min,  $t_{\text{major}} = 21.3$  min; 90:10 dr, 92% *ee*. M.p. 109–110 °C;  $[\alpha]_{\text{D}}^{25} -81.8$  ( $c$  1.48, CH<sub>2</sub>Cl<sub>2</sub>); <sup>1</sup>H NMR (400 MHz, CDCl<sub>3</sub>):  $\delta$  7.65 (d,  $J = 8.4$  Hz, 1H, ArH), 7.28–7.24 (m, 1H, ArH), 7.17–7.12 (m, 2H, ArH), 7.04 (d,  $J = 8.4$  Hz, 2H, ArH), 6.88 (d,  $J = 8.4$  Hz, 2H, ArH), 4.33 (dd,  $J_1 = 9.6$  Hz,  $J_2 = 7.6$  Hz, 1H, CH), 3.97 (dd,  $J_1 = 12.0$  Hz,  $J_2 = 10.0$  Hz, 1H, CH), 3.93 (d,  $J = 8.0$  Hz, 1H, CH), 3.88 (d,  $J = 12.0$  Hz, 1H, CH), 1.59 (s, 9H, CH<sub>3</sub>), 1.58 (s, 9H, CH<sub>3</sub>), 0.94 (s, 9H, CH<sub>3</sub>) ppm; <sup>13</sup>C NMR (100 MHz, CDCl<sub>3</sub>):  $\delta$  174.2, 172.8, 171.2, 167.0, 148.3, 145.9, 139.9, 134.1, 131.1, 129.6, 129.1, 128.4, 124.6, 124.3, 123.6, 115.3, 86.6, 84.8, 82.6, 65.1, 58.0, 54.7, 48.0, 45.5, 28.0, 27.7, 27.0 ppm; IR (KBr):  $\tilde{\nu}$  2981, 2933, 1792, 1769, 1734, 1608, 1495, 1481, 1465, 1395, 1371, 1351, 1310, 1256, 1151, 1098, 842, 762 cm<sup>-1</sup>; HRMS (ESI):  $m/z$  calcd. for C<sub>35</sub>H<sub>43</sub>ClN<sub>3</sub>O<sub>9</sub> [M + NH<sub>4</sub>]<sup>+</sup> 684.26823, found 684.26752.

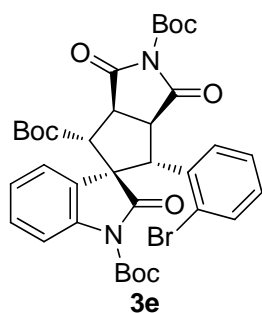

**(3a*S*,3'*R*,4*S*,6*R*,6a*S*)-Tri-*tert*-butyl 4-(2-bromophenyl)-1,2',3-trioxo-3a,4,6,6a-tetrahydro-1*H*-spiro[cyclopenta[*c*]pyrrole-5,3'-indoline]-1',2,6(3*H*)-tricarboxylate (3e):** The title compound **3e** was obtained according to the general procedure as a white solid (126.3 mg, 89% yield). HPLC (Daicel Chiralpak IA, *n*-hexane/2-propanol = 60:40, flow rate 0.5 mL/min, detection at 254 nm): major diastereomer:  $t_{\text{minor}} = 10.2$  min,  $t_{\text{major}} = 22.7$  min; minor diastereomer:  $t_{\text{R}} = 19.9, 28.0$  min; 96:4 dr, 87% *ee*. M.p. 141–142 °C;  $[\alpha]_{\text{D}}^{25} -66.9$  ( $c$  1.65, CH<sub>2</sub>Cl<sub>2</sub>); <sup>1</sup>H NMR (400 MHz, CDCl<sub>3</sub>):  $\delta$  7.72 (d,  $J = 8.0$  Hz, 1H, ArH), 7.45 (d,  $J = 8.0$  Hz, 1H, ArH), 7.31 (t,  $J = 7.8$  Hz, 1H, ArH), 7.25 (d,  $J = 7.6$  Hz, 1H, ArH), 7.18 (t,  $J = 7.4$  Hz, 1H, ArH), 6.95 (t,  $J = 7.6$  Hz, 1H, ArH), 6.85 (t,  $J = 7.4$  Hz, 1H, ArH), 6.64 (d,  $J = 8.0$  Hz, 1H,

ArH), 4.68 (d,  $J = 11.6$  Hz, 1H, CH), 4.33 (dd,  $J_1 = 9.6$  Hz,  $J_2 = 7.6$  Hz, 1H, CH), 4.04 (d,  $J = 8.0$  Hz, 1H, CH), 3.78 (t,  $J = 10.4$  Hz, 1H, CH), 1.58 (s, 9H, CH<sub>3</sub>), 1.55 (s, 9H, CH<sub>3</sub>), 0.95 (s, 9H, CH<sub>3</sub>) ppm; <sup>13</sup>C NMR (100 MHz, CDCl<sub>3</sub>):  $\delta$  172.9, 172.8, 171.0, 167.1, 148.7, 145.9, 140.3, 133.2, 129.6, 129.4, 128.9, 126.6, 125.7, 124.9, 124.1, 124.0, 115.3, 86.4, 84.4, 82.5, 64.2, 55.5, 54.8, 50.7, 45.6, 27.9, 27.7, 27.0 ppm; IR (KBr):  $\tilde{\nu}$  2981, 2932, 1794, 1770, 1732, 1067, 1480, 1465, 1395, 1370, 1351, 1321, 1272, 1256, 1150, 1098, 1033, 842, 759 cm<sup>-1</sup>; HRMS (ESI):  $m/z$  calcd. for C<sub>35</sub>H<sub>43</sub>BrN<sub>3</sub>O<sub>9</sub> [M + NH<sub>4</sub>]<sup>+</sup> 728.21772, found 728.21894.

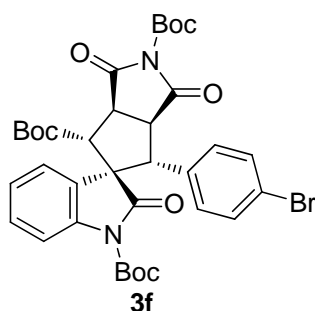

**(3a*S*,3'*R*,4*R*,6*R*,6a*S*)-Tri-*tert*-butyl 4-(4-bromophenyl)-1,2',3-trioxo-3a,4,6,6a-tetrahydro-1*H*-spiro[cyclopenta[*c*]pyrrole-5,3'-indoline]-1',2,6(3*H*)-tricarboxylate (3f):** The title compound **3f** was obtained according to the general procedure as a colorless solid (117.8 mg, 83% yield). HPLC (Daicel Chiralpak IA, *n*-hexane/2-propanol = 60:40, flow rate 0.5 mL/min, detection at 254 nm): major diastereomer:  $t_{\text{minor}} = 10.0$  min,  $t_{\text{major}} = 29.5$  min; minor diastereomer:  $t_{\text{R}} = 19.8, 34.4$  min; 92:8 dr, 87% *ee*. M.p. 95–96 °C;  $[\alpha]_{\text{D}}^{25} -73.4$  ( $c$  3.48, CH<sub>2</sub>Cl<sub>2</sub>); <sup>1</sup>H NMR (400 MHz, CDCl<sub>3</sub>):  $\delta$  7.65 (d,  $J = 8.4$  Hz, 1H, ArH), 7.29–7.24 (m, 1H, ArH), 7.20–7.12 (m, 4H, ArH), 6.82 (d,  $J = 8.4$  Hz, 2H, ArH), 4.33 (dd,  $J_1 = 9.6$  Hz,  $J_2 = 7.6$  Hz, 1H, CH), 3.97 (dd,  $J_1 = 12.0$  Hz,  $J_2 = 10.0$  Hz, 1H, CH), 3.93 (d,  $J = 8.0$  Hz, 1H, CH), 3.87 (d,  $J = 12.0$  Hz, 1H, CH), 1.59 (s, 9H, CH<sub>3</sub>), 1.58 (s, 9H, CH<sub>3</sub>), 0.94 (s, 9H, CH<sub>3</sub>) ppm; <sup>13</sup>C NMR (100 MHz, CDCl<sub>3</sub>):  $\delta$  174.2, 172.8, 171.2, 167.0, 148.3, 145.9, 139.9, 131.6, 131.4, 129.6, 129.4, 124.6, 124.3, 123.6, 122.4, 115.3, 86.6, 84.8, 82.6, 65.1, 58.1, 54.8, 48.0, 45.5, 28.0, 27.7, 27.0 ppm; IR (KBr):  $\tilde{\nu}$  2980, 2934, 1769, 1732, 1481, 1465, 1395, 1370, 1350, 1309, 1286, 1255, 1151, 1099, 1076, 1010, 842, 760, 737 cm<sup>-1</sup>; HRMS (ESI):  $m/z$  calcd. for C<sub>35</sub>H<sub>43</sub>BrN<sub>3</sub>O<sub>9</sub> [M + NH<sub>4</sub>]<sup>+</sup> 728.21772, found 728.21822.

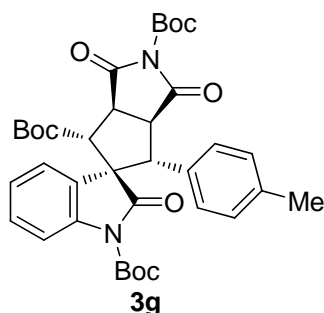

**(3a*S*,3'*R*,4*R*,6*R*,6a*S*)-Tri-*tert*-butyl 1,2',3-trioxo-6-(*p*-tolyl)-3a,4,6,6a-tetrahydro-1*H*-spiro[cyclopenta[*c*]pyrrole-5,3'-indoline]-1',2,4(3*H*)-tricarboxylate (3g):** The

title compound **3g** was obtained according to the general procedure as a colorless solid (122.8 mg, 95% yield). HPLC (Daicel Chiralpak IA, *n*-hexane/2-propanol = 70:30, flow rate 1.0 mL/min, detection at 254 nm): major diastereomer:  $t_{\text{minor}} = 5.2$  min,  $t_{\text{major}} = 18.2$  min; minor diastereomer:  $t_{\text{R}} = 8.4, 11.5$  min; 93:7 dr, 95% *ee*. M.p. 121–122 °C;  $[\alpha]_{\text{D}}^{25} -89.4$  (*c* 2.80, CH<sub>2</sub>Cl<sub>2</sub>); <sup>1</sup>H NMR (400 MHz, CDCl<sub>3</sub>):  $\delta$  7.64 (d, *J* = 8.4 Hz, 1H, ArH), 7.25–7.21 (m, 1H, ArH), 7.17 (dd, *J*<sub>1</sub> = 1.0 Hz, *J*<sub>2</sub> = 7.4 Hz, 1H, ArH), 7.12 (dt, *J*<sub>1</sub> = 0.8 Hz, *J*<sub>2</sub> = 7.6 Hz, 1H, ArH), 6.85 (d, *J* = 8.4 Hz, 1H, ArH), 6.81 (d, *J* = 8.4 Hz, 1H, ArH), 4.32 (dd, *J*<sub>1</sub> = 9.8 Hz, *J*<sub>2</sub> = 7.8 Hz, 1H, CH), 4.01 (dd, *J*<sub>1</sub> = 12.0 Hz, *J*<sub>2</sub> = 9.6 Hz, 1H, CH), 3.93 (d, *J* = 8.0 Hz, 1H, CH), 3.89 (d, *J* = 12.0 Hz, 1H, CH), 2.16 (s, 3H, CH<sub>3</sub>), 1.58 (s, 9H, CH<sub>3</sub>), 1.57 (s, 9H, CH<sub>3</sub>), 0.94 (s, 9H, CH<sub>3</sub>) ppm; <sup>13</sup>C NMR (100 MHz, CDCl<sub>3</sub>):  $\delta$  174.5, 173.1, 171.3, 167.2, 148.5, 146.0, 139.9, 137.7, 129.3, 129.2, 128.8, 127.5, 125.1, 124.1, 123.7, 115.0, 86.3, 84.4, 82.4, 65.3, 58.6, 54.7, 48.0, 45.5, 27.9, 27.7, 27.0, 20.9 ppm; IR (KBr):  $\tilde{\nu}$  2981, 2934, 1790, 1769, 1733, 1608, 1517, 1481, 1465, 1395, 1370, 1351, 1322, 1310, 1256, 1151, 1099, 1062, 1034, 1000, 842, 813, 759, 737, 701 cm<sup>-1</sup>; HRMS (ESI): *m/z* calcd. for C<sub>36</sub>H<sub>46</sub>N<sub>3</sub>O<sub>9</sub> [M + NH<sub>4</sub>]<sup>+</sup> 664.32286, found 664.32290; calcd. for C<sub>36</sub>H<sub>42</sub>N<sub>2</sub>NaO<sub>9</sub> [M + Na]<sup>+</sup> 669.27825, found 669.27788.

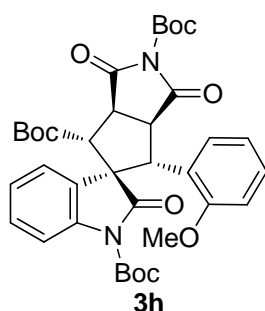

**(3a*S*,3'*R*,4*R*,6*R*,6a*S*)-Tri-*tert*-butyl 6-(2-methoxyphenyl)-1,2',3-trioxo-3a,4,6,6a-tetrahydro-1*H*-spiro[cyclopenta[*c*]pyrrole-5,3'-indoline]-1',2,4(3*H*)-tricarboxylate (3h):**

The title compound **3h** was obtained according to the general procedure as a white solid (108.5 mg, 82% yield). HPLC (Daicel Chiralpak AD-H, *n*-hexane/2-propanol = 60:40, flow rate 1.0 mL/min, detection at 254 nm): major diastereomer:  $t_{\text{minor}} = 6.9$  min,  $t_{\text{major}} = 22.1$  min; minor diastereomer:  $t_{\text{R}} = 9.6, 26.2$  min; 94:6 dr, 93% *ee*. M.p. 132–133 °C;  $[\alpha]_{\text{D}}^{25} -96.6$  (*c* 2.16, CH<sub>2</sub>Cl<sub>2</sub>); <sup>1</sup>H NMR (400 MHz, CDCl<sub>3</sub>):  $\delta$  7.63 (d, *J* = 8.4 Hz, 1H, ArH), 7.17–7.13 (m, 1H, ArH), 7.09–7.01 (m, 3H, ArH), 6.92 (d, *J* = 6.8 Hz, 1H, ArH), 6.64–6.60 (m, 2H, ArH), 4.42 (d, *J* = 11.2 Hz, 1H, CH), 4.32 (dd, *J*<sub>1</sub> = 9.8 Hz, *J*<sub>2</sub> = 7.8 Hz, 1H, CH), 4.22 (t, *J* = 10.6 Hz, 1H, CH), 4.04 (d, *J* = 7.6 Hz, 1H, CH), 3.66 (s, 3H, OCH<sub>3</sub>), 1.59 (s, 9H, CH<sub>3</sub>), 1.57 (s, 9H, CH<sub>3</sub>), 0.93 (s, 9H, CH<sub>3</sub>) ppm; <sup>13</sup>C NMR (100 MHz, CDCl<sub>3</sub>):  $\delta$  174.2, 173.2, 171.8, 167.4, 157.1, 148.9, 146.0, 139.9, 128.90, 128.86, 128.4, 125.8, 123.9, 123.6, 121.4, 119.8, 114.7, 110.0, 86.2, 84.0, 82.2, 64.4, 55.3, 54.7, 47.5, 45.4, 28.0, 27.7, 26.9 ppm; IR (KBr):  $\tilde{\nu}$  3058, 2980, 2935, 1794, 1770, 1729, 1607, 1496, 1481, 1465, 1395, 1370, 1353, 1304, 1254, 1152,



1099, 1060, 1028, 1005, 843, 788, 774, 753, 702, 635  $\text{cm}^{-1}$ ; HRMS (ESI):  $m/z$  calcd. for  $\text{C}_{36}\text{H}_{46}\text{N}_3\text{O}_{10}$   $[\text{M} + \text{NH}_4]^+$  680.31777, found 680.31752.

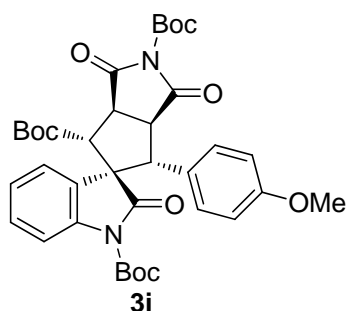

**(3aS,3'R,4R,6R,6aS)-Tri-tert-butyl 6-(4-methoxyphenyl)-1,2',3-trioxo-3a,4,6,6a-tetrahydro-1H-spiro[cyclopenta[c]pyrrole-5,3'-indoline]-1',2,4(3H)-tricarboxylate (3i):**

The title compound **3i** was obtained according to the general procedure as a colorless solid (113.8 mg, 86% yield). HPLC (Daicel Chiralpak IA, *n*-hexane/2-propanol = 70:30, flow rate 1.0 mL/min, detection at 254 nm): major diastereomer:  $t_{\text{minor}} = 5.9$  min,  $t_{\text{major}} = 21.1$  min; minor diastereomer:  $t_{\text{R}} = 9.4, 13.5$  min; 95:5 dr, 94% *ee*. M.p. 94–95 °C;  $[\alpha]_{\text{D}}^{25} -89.3$  (*c* 3.68,  $\text{CH}_2\text{Cl}_2$ );  $^1\text{H}$  NMR (400 MHz,  $\text{CDCl}_3$ ):  $\delta$  7.57 (d,  $J = 8.4$  Hz, 1H, ArH), 7.17 (t,  $J = 7.6$  Hz, 1H, ArH), 7.13–7.04 (m, 2H, ArH), 6.78 (d,  $J = 8.0$  Hz, 2H, ArH), 6.50 (d,  $J = 8.0$  Hz, 2H, ArH), 4.27–4.23 (m, 1H, CH), 3.92 (t,  $J = 10.8$  Hz, 1H, CH), 3.86 (d,  $J = 7.6$  Hz, 1H, CH), 3.81 (d,  $J = 12.0$  Hz, 1H, CH), 3.58 (s, 3H,  $\text{OCH}_3$ ), 1.51 (s, 9H,  $\text{CH}_3$ ), 1.50 (s, 9H,  $\text{CH}_3$ ), 0.86 (s, 9H,  $\text{CH}_3$ ) ppm;  $^{13}\text{C}$  NMR (100 MHz,  $\text{CDCl}_3$ ):  $\delta$  174.5, 173.1, 171.4, 167.2, 159.0, 148.4, 145.9, 139.8, 129.3, 128.8, 125.0, 124.2, 124.1, 123.6, 115.0, 113.4, 86.3, 84.5, 82.3, 65.2, 58.2, 54.9, 54.5, 48.1, 45.4, 27.9, 27.6, 26.9 ppm; IR (KBr):  $\tilde{\nu}$  3057, 2981, 2935, 1792, 1769, 1731, 1611, 1516, 1481, 1465, 1395, 1371, 1352, 1310, 1257, 1152, 1099, 1075, 1063, 1034, 843, 788, 759, 739  $\text{cm}^{-1}$ ; HRMS (ESI):  $m/z$  calcd. for  $\text{C}_{36}\text{H}_{46}\text{N}_3\text{O}_{10}$   $[\text{M} + \text{NH}_4]^+$  680.31777, found 680.31876.

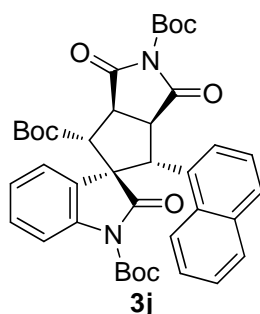

**(3aS,3'R,4R,6R,6aS)-Tri-tert-butyl 6-(naphthalen-1-yl)-1,2',3-trioxo-3a,4,6,6a-tetrahydro-1H-spiro[cyclopenta[c]pyrrole-5,3'-indoline]-1',2,4(3H)-tricarboxylate (3j):**

The title compound **3j** was obtained according to the general procedure as a white solid (122.7 mg, 90% yield). HPLC (Daicel Chiralpak AD-H, *n*-hexane/2-propanol = 50:50, flow rate 1.0 mL/min, detection at 254 nm): major diastereomer:  $t_{\text{minor}} = 9.1$  min,  $t_{\text{major}} = 17.5$  min; minor diastereomer:  $t_{\text{R}} = 20.9, 30.9$  min; 95:5 dr, 90% *ee*. M.p. 130–131 °C;  $[\alpha]_{\text{D}}^{25} -222.5$  (*c* 2.69,

CH<sub>2</sub>Cl<sub>2</sub>); <sup>1</sup>H NMR (400 MHz, CDCl<sub>3</sub>): δ 8.12 (d, *J* = 8.8 Hz, 1H, ArH), 7.71 (d, *J* = 8.0 Hz, 1H, ArH), 7.57 (d, *J* = 7.6 Hz, 1H, ArH), 7.49 (t, *J* = 7.4 Hz, 2H, ArH), 7.41 (t, *J* = 7.4 Hz, 1H, ArH), 7.27 (dd, *J*<sub>1</sub> = 7.0 Hz, *J*<sub>2</sub> = 1.0 Hz, 1H, ArH), 7.20–7.12 (m, 2H, ArH), 7.06–7.00 (m, 2H, ArH), 4.89 (d, *J* = 11.6 Hz, 1H, CH), 4.43 (dd, *J*<sub>1</sub> = 9.6 Hz, *J*<sub>2</sub> = 8.0 Hz, 1H, CH), 4.19 (t, *J* = 10.8 Hz, 1H, CH), 4.15 (d, *J* = 8.0 Hz, 1H, CH), 1.56 (s, 9H, CH<sub>3</sub>), 1.36 (s, 9H, CH<sub>3</sub>), 0.93 (s, 9H, CH<sub>3</sub>) ppm; <sup>13</sup>C NMR (100 MHz, CDCl<sub>3</sub>): δ 174.1, 173.1, 171.5, 167.3, 148.2, 146.0, 139.9, 133.5, 131.7, 129.2, 128.6, 128.53, 128.50, 126.4, 125.7, 125.5, 125.4, 124.0, 123.9, 122.9, 115.0, 86.4, 84.0, 82.5, 65.1, 54.9, 52.2, 49.8, 45.5, 27.7, 27.6, 27.0 ppm; IR (KBr):  $\tilde{\nu}$  3054, 2981, 2934, 1790, 1769, 1733, 1608, 1481, 1465, 1395, 1370, 1353, 1309, 1287, 1255, 1152, 1104, 1062, 842, 776, 758, 738, 702 632 cm<sup>-1</sup>; HRMS (ESI): *m/z* calcd. for C<sub>39</sub>H<sub>46</sub>N<sub>3</sub>O<sub>9</sub> [M + NH<sub>4</sub>]<sup>+</sup> 700.32286, found 700.32395.

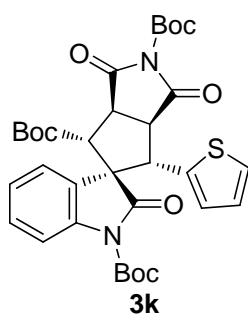

**(3*aS*,3'*S*,4*R*,6*S*,6*aR*)-Tri-*tert*-butyl 1,2',3-trioxo-6-(thiophen-2-yl)-3*a*,4,6,6*a*-tetrahydro-1*H*-spiro[cyclopenta[*c*]pyrrole-5,3'-indoline]-1',2,4(3*H*)-tricarboxylate (3k):** The title compound **3k** was obtained according to the general procedure as a colorless solid (117.3 mg, 92% yield). HPLC (Daicel Chiralpak IA, *n*-hexane/2-propanol = 70:30, flow rate 1.0 mL/min, detection at 254 nm): major diastereomer: *t*<sub>minor</sub> = 7.2 min, *t*<sub>major</sub> = 22.5 min; minor diastereomer: *t*<sub>R</sub> = 8.2, 11.1 min; 95:5 dr, 94% *ee*. M.p. 115–116 °C; [α]<sub>D</sub><sup>25</sup> –70.1 (*c* 2.86, CH<sub>2</sub>Cl<sub>2</sub>); <sup>1</sup>H NMR (400 MHz, CDCl<sub>3</sub>): δ 7.76 (d, *J* = 8.4 Hz, 1H, ArH), 7.33–7.28 (m, 1H, ArH), 7.18–7.13 (m, 2H, ArH), 7.00 (dd, *J*<sub>1</sub> = 4.8 Hz, *J*<sub>2</sub> = 1.2 Hz, 1H, ArH), 6.78–6.73 (m, 2H, ArH), 4.31 (dd, *J*<sub>1</sub> = 10.0 Hz, *J*<sub>2</sub> = 8.0 Hz, 1H, CH), 4.22 (d, *J* = 12.0 Hz, 1H, CH), 3.90–3.82 (m, 2H, CH), 1.60 (s, 9H, CH<sub>3</sub>), 1.58 (s, 9H, CH<sub>3</sub>), 0.96 (s, 9H, CH<sub>3</sub>) ppm; <sup>13</sup>C NMR (100 MHz, CDCl<sub>3</sub>): δ 174.1, 172.6, 170.8, 166.9, 148.5, 145.8, 140.3, 135.6, 129.7, 127.1, 126.3, 125.6, 124.8, 124.4, 123.9, 115.2, 86.5, 84.6, 82.5, 64.8, 54.7, 54.3, 50.6, 45.5, 27.9, 27.6, 27.0 ppm; IR (KBr):  $\tilde{\nu}$  3057, 2981, 2935, 1793, 1769, 1732, 1608, 1481, 1466, 1395, 1371, 1350, 1320, 1309, 1256, 1152, 1100, 842, 759, 738, 702 cm<sup>-1</sup>; HRMS (ESI): *m/z* calcd. for C<sub>33</sub>H<sub>42</sub>N<sub>3</sub>O<sub>9</sub>S [M + NH<sub>4</sub>]<sup>+</sup> 656.26363, found 656.26416.

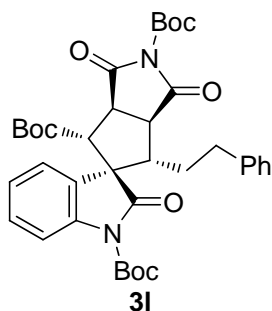

**(3a*S*,3'*R*,4*R*,6*S*,6a*S*)-Tri-*tert*-butyl 1,2,3-trioxo-6-phenethyl-3a,4,6,6a-tetrahydro-1*H*-spiro[cyclopenta[*c*]pyrrole-5,3'-indoline]-1',2,4(3*H*)-tricarboxylate (31):**

The title compound **31** was obtained according to the general procedure as a colorless solid (83.2 mg, 63% yield). HPLC (Daicel Chiralpak IB, *n*-hexane/2-propanol = 70:30, flow rate 1.0 mL/min, detection at 254 nm): major diastereomer:  $t_{\text{minor}} = 6.4$  min,  $t_{\text{major}} = 7.3$  min; minor diastereomer:  $t_{\text{R}} = 4.4, 4.6, 12.8, 17.2$  min; 86:14 dr, 96% *ee*. M.p. 84–85 °C;  $[\alpha]_{\text{D}}^{25} -35.1$  (*c* 2.10, CH<sub>2</sub>Cl<sub>2</sub>); <sup>1</sup>H NMR (400 MHz, CDCl<sub>3</sub>):  $\delta$  7.97 (d, *J* = 8.0 Hz, 1H, ArH), 7.40 (t, *J* = 7.8 Hz, 1H, ArH), 7.20–7.15 (m, 3H, ArH), 7.11 (t, *J* = 7.0 Hz, 1H, ArH), 7.04 (d, *J* = 7.6 Hz, 1H, ArH), 6.89 (d, *J* = 7.6 Hz, 2H, ArH), 4.17 (t, *J* = 9.0 Hz, 1H, CH), 3.74 (d, *J* = 8.0 Hz, 1H, CH), 3.30 (t, *J* = 10.4 Hz, 1H, CH), 2.89–2.83 (m, 1H, CH), 2.63–2.55 (m, 1H, CH<sub>2</sub>), 2.32–2.24 (m, 1H, CH<sub>2</sub>), 1.88–1.79 (m, 1H, CH<sub>2</sub>), 1.64 (s, 9H, CH<sub>3</sub>), 1.60 (s, 9H, CH<sub>3</sub>), 1.38–1.29 (m, 1H, CH<sub>2</sub>), 0.98 (s, 9H, CH<sub>3</sub>) ppm; <sup>13</sup>C NMR (100 MHz, CDCl<sub>3</sub>):  $\delta$  175.0, 172.7, 172.6, 166.9, 148.8, 146.0, 140.9, 140.2, 129.6, 128.3, 128.1, 125.9, 125.0, 124.6, 123.8, 115.4, 86.5, 84.8, 82.5, 63.1, 56.2, 53.0, 50.6, 45.9, 33.3, 32.6, 28.0, 27.7, 27.0 ppm; IR (KBr):  $\tilde{\nu}$  3062, 2981, 2933, 1794, 1767, 1732, 1607, 1496, 1480, 1465, 1395, 1371, 1350, 1323, 1286, 1256, 1151, 1106, 1076, 843, 758, 738, 701, 633 cm<sup>-1</sup>; HRMS (ESI): *m/z* calcd. for C<sub>37</sub>H<sub>48</sub>N<sub>3</sub>O<sub>9</sub> [M + NH<sub>4</sub>]<sup>+</sup> 678.33851, found 678.33953; calcd. for C<sub>37</sub>H<sub>44</sub>N<sub>2</sub>NaO<sub>9</sub> [M + Na]<sup>+</sup> 683.29390, found 683.29477.

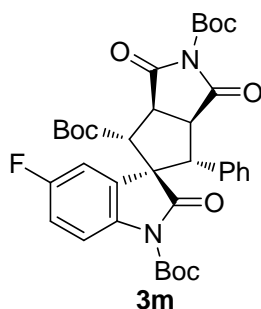

**(3a*S*,3'*R*,4*R*,6*R*,6a*S*)-Tri-*tert*-butyl 5'-fluoro-1,2,3-trioxo-6-phenyl-3a,4,6,6a-tetrahydro-1*H*-spiro[cyclopenta[*c*]pyrrole-5,3'-indoline]-1',2,4(3*H*)-tricarboxylate (3m):**

The title compound **3m** was obtained according to the general procedure as a colorless solid (101.2 mg, 78% yield). HPLC (Daicel Chiralpak IB, *n*-hexane/2-propanol = 70:30, flow rate 0.5 mL/min, detection at 254 nm): major diastereomer:  $t_{\text{major}} = 9.9$  min,  $t_{\text{minor}} = 10.7$  min; minor diastereomer:  $t_{\text{R}} = 17.2$  min; 99:1 dr, 91% *ee*. M.p. 155–156 °C;  $[\alpha]_{\text{D}}^{25} -75.1$  (*c* 2.12,

CH<sub>2</sub>Cl<sub>2</sub>); <sup>1</sup>H NMR (400 MHz, CDCl<sub>3</sub>): δ 7.61 (dd, *J*<sub>1</sub> = 9.8 Hz, *J*<sub>2</sub> = 4.6 Hz, 1H, ArH), 7.14–7.06 (m, 3H, ArH), 6.98–6.90 (m, 4H, ArH), 4.32 (dd, *J*<sub>1</sub> = 9.6 Hz, *J*<sub>2</sub> = 7.6 Hz, 1H, CH), 4.04 (dd, *J*<sub>1</sub> = 12.0 Hz, *J*<sub>2</sub> = 10.0 Hz, 1H, CH), 3.96 (d, *J* = 7.6 Hz, 1H, CH), 3.95 (d, *J* = 12.0 Hz, 1H, CH), 1.58 (s, 18H, CH<sub>3</sub>), 0.99 (s, 9H, CH<sub>3</sub>) ppm; <sup>13</sup>C NMR (100 MHz, CDCl<sub>3</sub>): δ 174.1, 172.8, 171.1, 166.9, 159.3 (d, <sup>1</sup>*J*<sub>C-F</sub> = -243.5 Hz), 148.4, 145.9, 135.9 (d, <sup>4</sup>*J*<sub>C-F</sub> = 2.4 Hz), 132.1, 128.28, 128.25, 127.5, 126.7 (d, <sup>3</sup>*J*<sub>C-F</sub> = 7.7 Hz), 116.3 (d, <sup>3</sup>*J*<sub>C-F</sub> = 7.8 Hz), 115.7 (d, <sup>2</sup>*J*<sub>C-F</sub> = 22.3 Hz), 111.4 (d, <sup>2</sup>*J*<sub>C-F</sub> = 24.6 Hz), 86.5, 84.8, 82.7, 65.6 (d, <sup>4</sup>*J*<sub>C-F</sub> = 1.6 Hz), 58.7, 54.5, 47.4, 45.4, 27.9, 27.7, 27.1 ppm; IR (KBr):  $\tilde{\nu}$  3064, 2981, 2934, 1769, 1733, 1607, 1483, 1457, 1395, 1371, 1345, 1306, 1253, 1150, 1106, 1078, 1059, 1009, 868, 841, 820, 763, 737, 700 cm<sup>-1</sup>; HRMS (ESI): *m/z* calcd. for C<sub>35</sub>H<sub>43</sub>FN<sub>3</sub>O<sub>9</sub> [M + NH<sub>4</sub>]<sup>+</sup> 668.29778, found 668.29844.

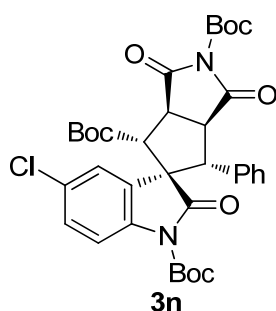

**(3a*S*,3'*R*,4*R*,6*R*,6a*S*)-Tri-*tert*-butyl 5'-chloro-1,2',3-trioxo-6-phenyl-3a,4,6,6a-tetrahydro-1*H*-spiro[cyclopenta[*c*]pyrrole-5,3'-indoline]-1',2,4(3*H*)-tricarboxylate (3n):** The title compound **3n** was obtained according to the general procedure as a colorless solid (113.0 mg, 85% yield). HPLC (Daicel Chiralpak IB, *n*-hexane/2-propanol = 70:30, flow rate 0.5 mL/min, detection at 254 nm): major diastereomer: *t*<sub>major</sub> = 9.7 min, *t*<sub>minor</sub> = 10.3 min; minor diastereomer: *t*<sub>R</sub> = 10.9, 14.1 min; 90:10 dr, 86% *ee*. M.p. 119–120 °C; [α]<sub>D</sub><sup>25</sup> -110.3 (*c* 2.34, CH<sub>2</sub>Cl<sub>2</sub>); <sup>1</sup>H NMR (400 MHz, CDCl<sub>3</sub>): δ 7.57 (d, *J* = 8.8 Hz, 1H, ArH), 7.20 (dd, *J*<sub>1</sub> = 8.8 Hz, *J*<sub>2</sub> = 2.0 Hz, 1H, ArH), 7.14 (d, *J* = 2.0 Hz, 1H, ArH), 7.12–7.07 (m, 3H, ArH), 6.95 (dd, *J*<sub>1</sub> = 7.6 Hz, *J*<sub>2</sub> = 1.2 Hz, 2H, ArH), 4.33 (dd, *J*<sub>1</sub> = 9.6 Hz, *J*<sub>2</sub> = 7.6 Hz, 1H, CH), 4.05 (dd, *J*<sub>1</sub> = 11.8 Hz, *J*<sub>2</sub> = 9.8 Hz, 1H, CH), 3.96 (d, *J* = 8.0 Hz, 1H, CH), 3.93 (d, *J* = 12.0 Hz, 1H, CH), 1.58 (s, 18H, CH<sub>3</sub>), 0.99 (s, 9H, CH<sub>3</sub>) ppm; <sup>13</sup>C NMR (100 MHz, CDCl<sub>3</sub>): δ 173.8, 172.8, 171.0, 166.9, 148.2, 145.9, 138.4, 132.0, 129.6, 129.2, 128.30, 128.27, 127.5, 127.0, 123.7, 116.2, 86.5, 84.9, 82.7, 65.4, 58.8, 54.4, 47.5, 45.5, 27.9, 27.7, 27.0 ppm; IR (KBr):  $\tilde{\nu}$  2979, 2934, 1770, 1735, 1587, 1476, 1456, 1395, 1371, 1336, 1306, 1272, 1254, 1150, 1114, 1076, 841, 778, 761, 735, 699 cm<sup>-1</sup>; HRMS (ESI): *m/z* calcd. for C<sub>35</sub>H<sub>43</sub>ClN<sub>3</sub>O<sub>9</sub> [M + NH<sub>4</sub>]<sup>+</sup> 684.26823, found 684.26914.

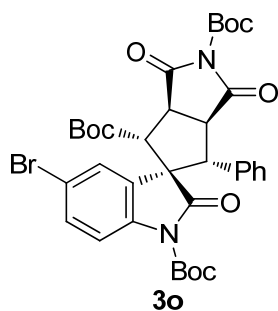

**(3a*S*,3'*R*,4*R*,6*R*,6a*S*)-Tri-tert-butyl 5'-bromo-1,2',3-trioxo-6-phenyl-3a,4,6,6a-tetrahydro-1*H*-spiro[cyclopenta[*c*]pyrrole-5,3'-indoline]-1',2,4(3*H*)-tricarboxylate (3o):** The title compound **3o** was obtained according to the general procedure as a colorless solid (120.6 mg, 85% yield). HPLC (Daicel Chiralpak IB, *n*-hexane/2-propanol = 70:30, flow rate 0.5 mL/min, detection at 254 nm): major diastereomer:  $t_{\text{major}} = 9.8$  min,  $t_{\text{minor}} = 10.4$  min; minor diastereomer:  $t_{\text{R}} = 10.9, 14.6$  min; 89:11 dr, 86% *ee*. M.p. 122–123 °C;  $[\alpha]_{\text{D}}^{25} -121.1$  (*c* 1.51, CH<sub>2</sub>Cl<sub>2</sub>); <sup>1</sup>H NMR (400 MHz, CDCl<sub>3</sub>):  $\delta$  7.52 (d,  $J = 8.8$  Hz, 1H, ArH), 7.35 (dd,  $J_1 = 8.6$  Hz,  $J_2 = 1.8$  Hz, 1H, ArH), 7.28 (d,  $J = 1.6$  Hz, 1H, ArH), 7.12–7.07 (m, 3H, ArH), 6.95 (d,  $J = 8.0$  Hz, 2H, ArH), 4.34 (dd,  $J_1 = 9.8$  Hz,  $J_2 = 7.8$  Hz, 1H, CH), 4.05 (dd,  $J_1 = 11.6$  Hz,  $J_2 = 10.0$  Hz, 1H, CH), 3.96 (d,  $J = 7.6$  Hz, 1H, CH), 3.92 (d,  $J = 12.0$  Hz, 1H, CH), 1.58 (s, 18H, CH<sub>3</sub>), 0.99 (s, 9H, CH<sub>3</sub>) ppm; <sup>13</sup>C NMR (100 MHz, CDCl<sub>3</sub>):  $\delta$  173.7, 172.8, 171.0, 166.9, 148.2, 145.9, 138.9, 132.2, 132.0, 128.31, 128.27, 127.5, 127.4, 126.5, 116.9, 116.6, 86.5, 85.0, 82.7, 65.3, 58.8, 54.4, 47.5, 45.5, 27.9, 27.7, 27.0 ppm; IR (KBr):  $\tilde{\nu}$  2980, 2934, 1770, 1733, 1473, 1457, 1395, 1371, 1335, 1306, 1274, 1255, 1150, 1114, 1073, 1004, 841, 762, 736, 699 cm<sup>-1</sup>; HRMS (ESI):  $m/z$  calcd. for C<sub>35</sub>H<sub>43</sub>BrN<sub>3</sub>O<sub>9</sub> [M + NH<sub>4</sub>]<sup>+</sup> 728.21772, found 728.21888; calcd. for C<sub>35</sub>H<sub>39</sub>BrN<sub>2</sub>NaO<sub>9</sub> [M + Na]<sup>+</sup> 733.17311, found 733.17412.

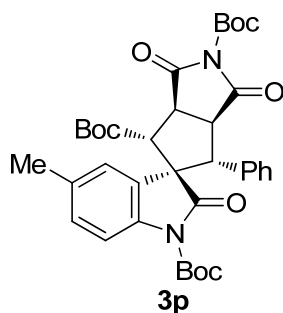

**(3a*S*,3'*R*,4*R*,6*R*,6a*S*)-Tri-tert-butyl 5'-methyl-1,2',3-trioxo-6-phenyl-3a,4,6,6a-tetrahydro-1*H*-spiro[cyclopenta[*c*]pyrrole-5,3'-indoline]-1',2,4(3*H*)-tricarboxylate (3p):** The title compound **3p** was obtained according to the general procedure as a colorless solid (113.5 mg, 88% yield). HPLC (Daicel Chiralpak IA, *n*-hexane/2-propanol = 70:30, flow rate 1.0 mL/min, detection at 254 nm): major diastereomer:  $t_{\text{minor}} = 4.5$  min,  $t_{\text{major}} = 13.0$  min; minor diastereomer:  $t_{\text{R}} = 6.5, 10.1$  min; 91:9 dr, 90% *ee*. M.p. 112–113 °C;  $[\alpha]_{\text{D}}^{25} -102.0$  (*c* 1.51, CH<sub>2</sub>Cl<sub>2</sub>); <sup>1</sup>H NMR (400 MHz, CDCl<sub>3</sub>):  $\delta$  7.48 (d,  $J = 8.4$  Hz, 1H, ArH), 7.11–7.01 (m, 4H, ArH), 6.94 (t,  $J = 6.8$  Hz, 3H, ArH), 4.34 (dd,  $J_1 = 9.6$  Hz,  $J_2 = 7.6$  Hz, 1H, CH), 4.04 (t,  $J =$

10.8 Hz, 1H, CH), 3.94 (d,  $J = 7.6$  Hz, 1H, CH), 3.90 (d,  $J = 12.0$  Hz, 1H, CH), 2.33 (s, 3H, CH<sub>3</sub>), 1.58 (s, 9H, CH<sub>3</sub>), 1.57 (s, 9H, CH<sub>3</sub>), 0.94 (s, 9H, CH<sub>3</sub>) ppm; <sup>13</sup>C NMR (100 MHz, CDCl<sub>3</sub>):  $\delta$  174.6, 173.0, 171.3, 167.2, 148.5, 146.0, 137.5, 133.8, 132.4, 129.7, 128.1, 127.7, 125.0, 124.1, 114.8, 86.4, 84.3, 82.4, 65.4, 58.8, 54.5, 47.9, 45.6, 27.9, 27.7, 27.0, 21.1 ppm; IR (KBr):  $\tilde{\nu}$  3063, 2981, 2933, 1769, 1732, 1489, 1457, 1395, 1371, 1341, 1310, 1256, 1153, 1115, 1079, 1063, 841, 820, 763, 737, 700 cm<sup>-1</sup>; HRMS (ESI):  $m/z$  calcd. for C<sub>36</sub>H<sub>46</sub>N<sub>3</sub>O<sub>9</sub> [M + NH<sub>4</sub>]<sup>+</sup> 664.32286, found 664.32394.

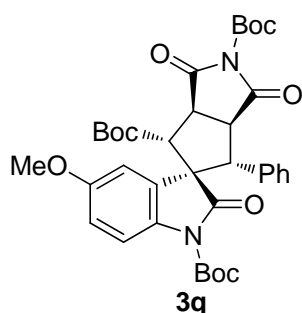

**(3a*S*,3'*R*,4*R*,6*R*,6a*S*)-Tri-*tert*-butyl 5'-methoxy-1,2',3-trioxo-6-phenyl-3a,4,6,6a-tetrahydro-*o*-1*H*-spiro[cyclopenta[*c*]pyrrole-5,3'-indoline]-1',2,4(3*H*)-tricarboxylate (3q):** The title compound **3q** was obtained according to the general procedure as a colorless solid (115.1 mg, 87% yield). HPLC (Daicel Chiralpak IB, *n*-hexane/2-propanol = 70:30, flow rate 1.0 mL/min, detection at 254 nm): major diastereomer:  $t_{\text{minor}} = 5.9$  min,  $t_{\text{major}} = 6.5$  min; minor diastereomer:  $t_{\text{R}} = 7.2, 9.3$  min; 92:8 dr, 92% *ee*. M.p. 110–111 °C;  $[\alpha]_{\text{D}}^{25} -102.8$  ( $c$  1.76, CH<sub>2</sub>Cl<sub>2</sub>); <sup>1</sup>H NMR (400 MHz, CDCl<sub>3</sub>):  $\delta$  7.53 (d,  $J = 8.4$  Hz, 1H, ArH), 7.12–7.05 (m, 3H, ArH), 6.96 (d,  $J = 7.2$  Hz, 2H, ArH), 6.75–6.72 (m, 2H, ArH), 4.32 (t,  $J = 8.6$  Hz, 1H, CH), 4.03 (t,  $J = 10.8$  Hz, 1H, CH), 3.94 (d,  $J = 8.0$  Hz, 1H, CH), 3.92 (d,  $J = 12.8$  Hz, 1H, CH), 3.78 (s, 3H, OCH<sub>3</sub>), 1.57 (s, 18H, CH<sub>3</sub>), 0.97 (s, 9H, CH<sub>3</sub>) ppm; <sup>13</sup>C NMR (100 MHz, CDCl<sub>3</sub>):  $\delta$  174.4, 172.9, 171.3, 167.1, 156.5, 148.5, 145.9, 133.3, 132.4, 128.1, 127.7, 126.3, 115.8, 113.2, 111.0, 86.4, 84.3, 82.4, 65.6, 58.8, 55.9, 54.6, 47.7, 45.6, 28.0, 27.7, 27.0 ppm; IR (KBr):  $\tilde{\nu}$  3064, 2981, 2936, 1768, 1729, 1487, 1457, 1395, 1371, 1308, 1269, 1253, 1152, 1116, 1079, 1060, 1040, 840, 763, 737, 699 cm<sup>-1</sup>; HRMS (ESI):  $m/z$  calcd. for C<sub>36</sub>H<sub>46</sub>N<sub>3</sub>O<sub>10</sub> [M + NH<sub>4</sub>]<sup>+</sup> 680.31777, found 680.31853; for C<sub>36</sub>H<sub>42</sub>N<sub>2</sub>NaO<sub>10</sub> [M + Na]<sup>+</sup> 685.27317, found 685.27406.

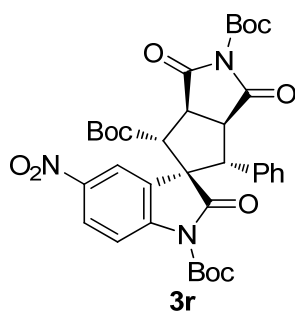

**(3a*S*,3'*R*,4*R*,6*R*,6a*S*)-Tri-*tert*-butyl 5'-nitro-1,2',3-trioxo-6-phenyl-3a,4,6,6a-tetrahydro-1**

***H*-spiro[cyclopenta[*c*]pyrrole-5,3'-indoline]-1',2,4(3*H*)-tricarboxylate (3r):** The title compound **3r** was obtained according to the general procedure as a colorless solid (98.6 mg, 73% yield). HPLC (Daicel Chiralpak IA, *n*-hexane/2-propanol = 85:15, flow rate 0.8 mL/min, detection at 254 nm): major diastereomer:  $t_{\text{major}} = 12.0$  min,  $t_{\text{minor}} = 14.8$  min; minor diastereomer:  $t_{\text{R}} = 17.5, 27.6$  min; 97:3 dr, 84% *ee*. M.p. 127–128 °C;  $[\alpha]_{\text{D}}^{25} -120.0$  (*c* 1.76, CH<sub>2</sub>Cl<sub>2</sub>); <sup>1</sup>H NMR (400 MHz, CDCl<sub>3</sub>):  $\delta$  8.16 (dd,  $J_1 = 9.0$  Hz,  $J_2 = 2.2$  Hz, 1H, ArH), 8.04 (d,  $J = 2.4$  Hz, 1H, ArH), 7.80 (d,  $J = 9.2$  Hz, 1H, ArH), 7.14–7.06 (m, 3H, ArH), 6.97–6.95 (m, 2H, ArH), 4.46 (dd,  $J_1 = 9.8$  Hz,  $J_2 = 7.8$  Hz, 1H, CH), 4.21 (dd,  $J_1 = 11.6$  Hz,  $J_2 = 10.0$  Hz, 1H, CH), 4.02 (d,  $J = 11.6$  Hz, 1H, CH), 4.01 (d,  $J = 7.6$  Hz, 1H, CH), 1.61 (s, 9H, CH<sub>3</sub>), 1.58 (s, 9H, CH<sub>3</sub>), 0.98 (s, 9H, CH<sub>3</sub>) ppm; <sup>13</sup>C NMR (100 MHz, CDCl<sub>3</sub>):  $\delta$  173.6, 172.6, 170.8, 166.6, 147.9, 145.8, 145.0, 143.9, 131.7, 128.52, 128.47, 127.4, 126.6, 125.6, 118.9, 115.0, 86.6, 85.9, 83.0, 65.3, 58.7, 54.5, 47.2, 45.4, 27.9, 27.7, 27.1 ppm; IR (KBr):  $\bar{\nu}$  3062, 2981, 2934, 1804, 1772, 1739, 1529, 1476, 1457, 1371, 1345, 1307, 1280, 1256, 1150, 1119, 1101, 865, 842, 762, 736, 700 cm<sup>-1</sup>; HRMS (ESI): *m/z* calcd. for C<sub>35</sub>H<sub>43</sub>N<sub>4</sub>O<sub>11</sub> [M + NH<sub>4</sub>]<sup>+</sup> 695.29228, found 695.29289.

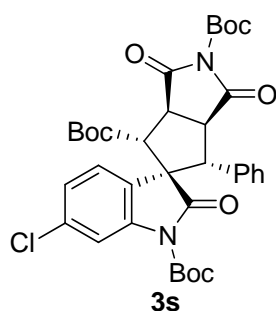

**(3*aS*,3'*R*,4*R*,6*R*,6*aS*)-Tri-*tert*-butyl 6'-chloro-1,2',3-trioxo-6-phenyl-3*a*,4,6,6*a*-tetrahydro-1*H*-spiro[cyclopenta[*c*]pyrrole-5,3'-indoline]-1',2,4(3*H*)-tricarboxylate (3s):** The title compound **3s** was obtained according to the general procedure as a colorless solid (102.3 mg, 77% yield). HPLC (Daicel Chiralpak IB, *n*-hexane/2-propanol = 70:30, flow rate 1.0 mL/min, detection at 254 nm): major diastereomer:  $t_{\text{minor}} = 5.9$  min,  $t_{\text{major}} = 7.0$  min; >99:1 dr, 94% *ee*. M.p. 129–130 °C;  $[\alpha]_{\text{D}}^{25} -99.3$  (*c* 2.45, CH<sub>2</sub>Cl<sub>2</sub>); <sup>1</sup>H NMR (400 MHz, CDCl<sub>3</sub>):  $\delta$  7.70 (s, 1H, ArH), 7.15–7.07 (m, 5H, ArH), 6.94 (d,  $J = 7.2$  Hz, 2H, ArH), 4.32 (dd,  $J_1 = 9.6$  Hz,  $J_2 = 7.6$  Hz, 1H, CH), 4.04 (dd,  $J_1 = 11.8$  Hz,  $J_2 = 9.8$  Hz, 1H, CH), 3.94 (d,  $J = 7.8$  Hz, 1H, CH), 3.93 (d,  $J = 13.2$  Hz, 1H, CH), 1.59 (s, 9H, CH<sub>3</sub>), 1.58 (s, 9H, CH<sub>3</sub>), 0.98 (s, 9H, CH<sub>3</sub>) ppm; <sup>13</sup>C NMR (100 MHz, CDCl<sub>3</sub>):  $\delta$  174.1, 172.9, 171.2, 167.0, 148.1, 145.8, 140.7, 135.1, 132.0, 128.32, 128.27, 127.5, 124.5, 124.1, 123.4, 115.7, 86.5, 85.1, 82.7, 65.1, 58.6, 54.6, 47.5, 45.3, 27.8, 27.6, 27.0 ppm; IR (KBr):  $\bar{\nu}$  3065, 2981, 2936, 1800, 1770, 1733, 1607, 1586, 1480, 1457, 1425, 1395, 1371, 1350, 1312, 1281, 1254, 1150, 1109, 1083, 1057, 843, 762, 737, 699, 639 cm<sup>-1</sup>; HRMS (ESI): *m/z* calcd. for C<sub>35</sub>H<sub>43</sub>ClN<sub>3</sub>O<sub>9</sub> [M + NH<sub>4</sub>]<sup>+</sup> 684.2682, found 684.2678.

### Gram-scale asymmetric cascade Michael/Michael reaction of $\alpha$ -alkylidene succinimide **2d** to **1b**.

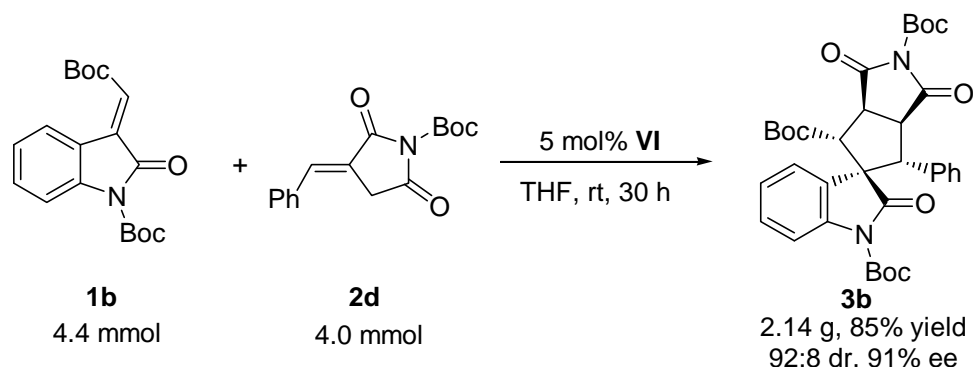

To a dried 50 mL bottle were added **2d** (4.0 mmol, 0.574 g) and catalyst **VI** (126.5 mg, 0.2 mmol, 5 mol %) in THF (20.0 mL). The mixture was stirred at room temperature for 30 min, and **1b** (1.52 g, 4.4 mmol) was then added. After stirring at room temperature for 30 h, the **2d** was completely consumed as detected by TLC analysis (petroleum ether/EtOAc 4:1). Product **3b** was obtained by silica gel column chromatography (petroleum ether/EtOAc 5:1), as a colorless solid (2.14 g, 85% yield) with 92:8 dr and 91% ee.

### One-pot four-component reaction for the synthesis of **3b**.

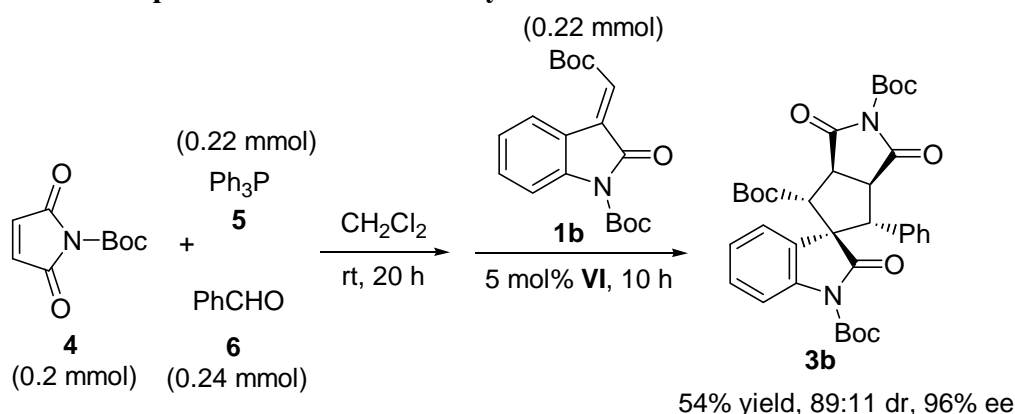

The *N*-Boc protected maleimide (0.2 mmol, 39.4 mg), triphenylphosphine (57.7 mg, 0.22 mmol) and benzaldehyde (25.4 mg, 2.4 mmol), were dissolved in anhydrous  $\text{CH}_2\text{Cl}_2$  (1.0 mL) and stirred at room temperature for 20 h. After that, catalyst **VI** (6.3 mg, 0.01 mmol, 5 mol %) and **1b** (76.0 mg, 0.22 mmol) were added. After stirring at room temperature for 10 h, the reaction mixture was concentrated and directly purified by silica gel column chromatography (petroleum ether/EtOAc 5:1) to afford the desired product **3b** as a colorless solid (68.3 mg, 54% yield) with 89:11 dr and 96% ee.

### Synthetic transformation of Michael/Michael adduct **3b**.



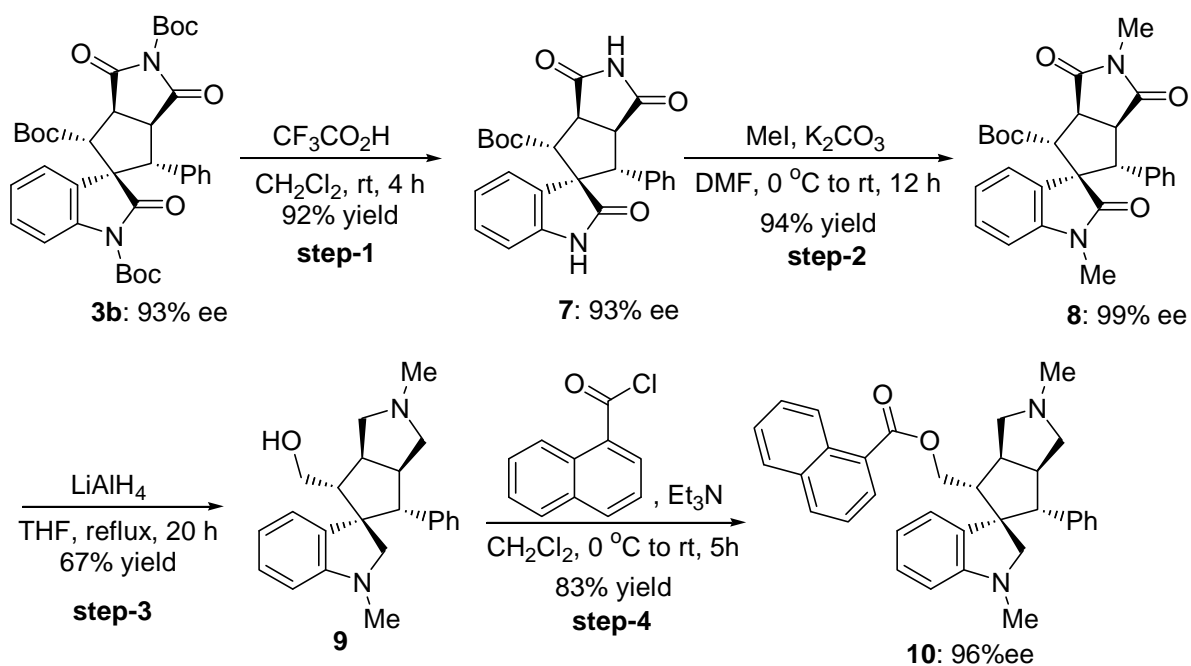

**Step-1:** The major diastereomer of **3b** (1.26 g, 2.0 mmol) was dissolved in  $\text{CH}_2\text{Cl}_2$  (30 mL) at room temperature. TFA was added dropwise and the reaction mixture was stirred at room temperature for another 4 h. After that, the reaction mixture was concentrated and directly purified by silica gel column chromatography (petroleum ether/EtOAc 1:1) to afford the desired product **7** as a white solid (0.795 g, 92% yield).

**Step-2:** To a solution of product **7** (0.52 g, 1.2 mmol) in DMF (10 mL) was added  $\text{K}_2\text{CO}_3$  (1.0 g, 7.2 mmol) at 0 °C. The mixture was stirred at 0 °C for 15 min. Then 0.3 mL MeI (0.68 g, 4.8 mmol) was added dropwise over a period of 10 min into the stirred reaction mixture. After the addition of the MeI was complete, the reaction mixture was allowed to stir at room temperature. The mixture was stirred for 12 h and was then quenched with 100 water, the aqueous phase was extracted with  $\text{CH}_2\text{Cl}_2$  ( $3 \times 30$  mL). The combined organic phases were dried over anhydrous  $\text{Na}_2\text{SO}_4$ . The solvent was removed in vacuo and the residue was purified by silica gel flash column chromatography (petroleum ether/ethyl acetate = 2:1) to afford **8** as a white solid (0.52 g, 94% yield).

**Step-3:** Compound **8** (92.0 mg, 0.2 mmol) was dissolved in dry THF (4 mL) at 0 °C under a argon atmosphere. Lithium aluminium hydride (60.7 mg, 1.6 mmol) was added in portions. Cooling was removed and the mixture was heated at reflux for 20 h protected from air. The mixture was cooled to 0 °C and quenched with EtOAc. After filtration, the filtrate was concentrated under reduced pressure. The residue was purified by silica gel flash column chromatography ( $\text{CH}_2\text{Cl}_2/\text{MeOH} = 10:1$ ) to afford the product **9** as a pale yellow soild (46.6 mg, 67% yield).

**Step-4:** To a stirred solution of product **9** (52.2 mg, 0.15 mmol) in CH<sub>2</sub>Cl<sub>2</sub> (3 mL) was added Et<sub>3</sub>N (51 mg, 0.5 mmol) at 0 °C. Then naphthoyl chlorid (95 mg, 0.5 mmol) in 2 mL CH<sub>2</sub>Cl<sub>2</sub> was added dropwise into the stirred reaction mixture. The reaction mixture was allowed to stir at room temperature for another 5 h, the product **9** was completely consumed as detected by TLC analysis. After that, the reaction mixture was concentrated and directly purified by silica gel column chromatography (CH<sub>2</sub>Cl<sub>2</sub>/MeOH = 30:1) to afford the desired product **10** as a pale yellow soild (62.5 mg, 83% yield).

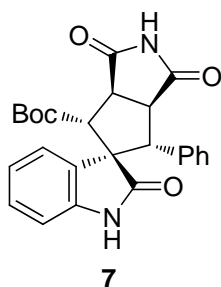

**(3a*S*,3'*R*,4*R*,6*R*,6a*S*)-tert-Butyl 1,2,3-trioxo-6-phenyl-2,3,3a,4,6,6a-hexahydro-1*H*-spiro[cyclopenta[*c*]pyrrole-5,3'-indoline]-4-carboxylate (**7**):** HPLC (Daicel Chiralpak IB, *n*-hexane/2-propanol = 60:40, flow rate 1.0 mL/min, detection at 254 nm):  $t_{\text{minor}} = 6.9$  min,  $t_{\text{major}} = 9.6$  min; 93% *ee*. M.p. 171–173 °C;  $[\alpha]_{\text{D}}^{25} -127.2$  (*c* 2.48, CH<sub>2</sub>Cl<sub>2</sub>); <sup>1</sup>H NMR (400 MHz, CDCl<sub>3</sub>):  $\delta$  9.28 (s, 1H, NH), 8.79 (s, 1H, NH), 7.21 (d,  $J = 7.2$  Hz, 1H, ArH), 7.15–6.99 (m, 5H, ArH), 6.95 (d,  $J = 7.6$  Hz, 2H, ArH), 6.66 (d,  $J = 7.6$  Hz, 1H, ArH), 4.39 (t,  $J = 8.6$  Hz, 1H, CH), 4.03 (t,  $J = 10.6$  Hz, 1H, CH), 3.89–3.85 (m, 2H, CH), 0.98 (s, 3H, CH<sub>3</sub>) ppm; <sup>13</sup>C NMR (100 MHz, CDCl<sub>3</sub>):  $\delta$  178.4, 178.1, 176.7, 167.9, 141.0, 133.0, 129.3, 128.1, 128.05, 127.97, 126.5, 124.6, 122.5, 110.3, 82.5, 66.1, 58.0, 53.5, 49.5, 46.9, 27.2 ppm; IR (KBr):  $\bar{\nu}$  3239, 3063, 2978, 1776, 1718, 1619, 1486, 1472, 1456, 1369, 1340, 1293, 1248, 1183, 1155, 836, 746, 698, 679 cm<sup>-1</sup>; HRMS (ESI):  $m/z$  calcd. for C<sub>25</sub>H<sub>28</sub>N<sub>3</sub>O<sub>5</sub> [M + NH<sub>4</sub>]<sup>+</sup> 450.20235, found 450.20285; calcd. for C<sub>25</sub>H<sub>24</sub>N<sub>2</sub>NaO<sub>5</sub> [M + Na]<sup>+</sup> 455.15774, found 455.15834.

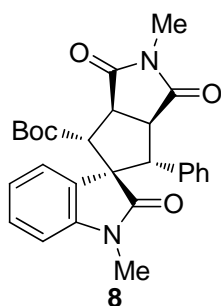

**(3a*S*,3'*R*,4*R*,6*R*,6a*S*)-tert-Butyl 1,2-dimethyl-1,2,3-trioxo-6-phenyl-2,3,3a,4,6,6a-hexahydro-1*H*-spiro[cyclopenta[*c*]pyrrole-5,3'-indoline]-4-carboxylate (**8**):** HPLC (Daicel Chiralpak IB, *n*-hexane/2-propanol = 70:30, flow rate 1.0 mL/min, detection at 254 nm):  $t_{\text{major}} = 15.8$  min; >99% *ee*. M.p. 237–239 °C;  $[\alpha]_{\text{D}}^{25} -135.5$  (*c* 3.40, CH<sub>2</sub>Cl<sub>2</sub>); <sup>1</sup>H NMR

(400 MHz, CDCl<sub>3</sub>):  $\delta$  7.21–7.16 (m, 2H, ArH), 7.07–7.00 (m, 4H, ArH), 6.92 (d,  $J$  = 7.2 Hz, 2H, ArH), 6.57 (d,  $J$  = 8.0 Hz, 1H, ArH), 4.33 (t,  $J$  = 8.6 Hz, 1H, CH), 4.03 (dd,  $J_1$  = 9.6 Hz,  $J_2$  = 11.6 Hz, 1H, CH), 3.83 (d,  $J$  = 8.0 Hz, 1H, CH), 3.76 (d,  $J$  = 11.6 Hz, 1H, CH), 3.02 (s, 3H, CH<sub>3</sub>), 3.01 (s, 3H, CH<sub>3</sub>), 0.92 (s, 3H, CH<sub>3</sub>) ppm; <sup>13</sup>C NMR (100 MHz, CDCl<sub>3</sub>):  $\delta$  177.2, 176.0, 175.5, 167.8, 143.6, 133.1, 129.0, 127.7, 127.64, 127.60, 126.1, 124.1, 122.2, 107.9, 81.6, 65.3, 57.8, 53.1, 47.7, 45.7, 27.1, 26.1, 25.0 ppm; IR (KBr):  $\tilde{\nu}$  3059, 2978, 2935, 1779, 1706, 1612, 1496, 1471, 1455, 1434, 1378, 1352, 1294, 1262, 1155, 1137, 1099, 1021, 960, 843, 809, 755, 735, 699 cm<sup>-1</sup>; HRMS (ESI):  $m/z$  calcd. for C<sub>27</sub>H<sub>29</sub>N<sub>2</sub>O<sub>5</sub> [M + H]<sup>+</sup> 461.20710, found 461.20760.

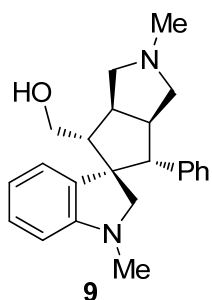

**((3a*S*,3'*R*,4*R*,6*R*,6a*S*)-1',2-Dimethyl-4-phenyl-2,3,3a,4,6,6a-hexahydro-1*H*-spiro[cyclopenta[*c*]pyrrole-5,3'-indolin]-6-yl)methanol (**9**):** The enantiomers of title compound **9** can not be separated by chiral HPLC analysis. M.p. 61–62 °C; [ $\alpha$ ]<sub>D</sub><sup>25</sup> –183.4 ( $c$  1.53, CH<sub>2</sub>Cl<sub>2</sub>); <sup>1</sup>H NMR (400 MHz, CDCl<sub>3</sub>):  $\delta$  7.30 (d,  $J$  = 7.2 Hz, 1H, ArH), 7.21–7.08 (m, 6H, ArH), 6.83 (t,  $J$  = 7.6 Hz, 1H, ArH), 6.51 (d,  $J$  = 7.6 Hz, 1H, ArH), 4.19 (br s, 1H, OH), 3.42 (dd,  $J_1$  = 11.8 Hz,  $J_2$  = 1.8 Hz, 1H, CH), 3.34 (d,  $J$  = 9.2 Hz, 1H, CH), 3.29–3.21 (m, 2H, CH<sub>2</sub>), 2.99 (d,  $J$  = 8.8 Hz, 1H, CH), 2.91 (d,  $J$  = 11.6 Hz, 1H, CH), 2.88–2.82 (m, 1H, CH<sub>2</sub>), 2.80 (d,  $J$  = 11.6 Hz, 1H, CH<sub>2</sub>), 2.57 (s, 3H, CH<sub>3</sub>), 2.42 (s, 3H, CH<sub>3</sub>), 2.41–2.36 (m, 2H, CH<sub>2</sub>), 2.28–2.25 (m, 1H, CH<sub>2</sub>), 2.18 (dd,  $J_1$  = 9.2 Hz,  $J_2$  = 6.4 Hz, 1H, CH<sub>2</sub>) ppm; <sup>13</sup>C NMR (100 MHz, CDCl<sub>3</sub>):  $\delta$  153.6, 139.3, 130.2, 130.1, 128.1, 127.9, 126.6, 125.9, 119.2, 109.8, 64.1, 63.8, 61.5, 61.1, 60.9, 60.7, 59.0, 48.2, 43.1, 41.8, 36.2 ppm; IR (KBr):  $\tilde{\nu}$  3358, 3030, 2941, 2850, 2783, 1602, 1492, 1454, 1424, 1384, 1350, 1303, 1259, 1206, 1156, 1139, 1104, 1044, 1027, 979, 744, 701 cm<sup>-1</sup>; HRMS (ESI):  $m/z$  calcd. for C<sub>23</sub>H<sub>29</sub>N<sub>2</sub>O [M + H]<sup>+</sup> 349.2274, found 349.2279.

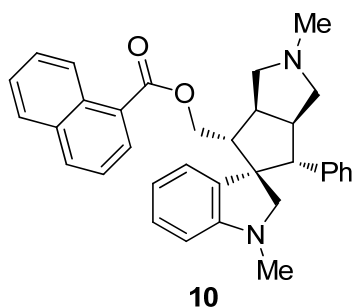

**((3a*S*,3'*R*,4*R*,6*R*,6a*S*)-1',2-Dimethyl-4-phenyl-2,3,3a,4,6,6a-hexahydro-1*H*-spiro[cyclopenta[**

**ta[c]pyrrole-5,3'-indolin]-6-yl)methyl 1-naphthoate (10):** HPLC (Daicel Chiralpak AD-H, *n*-hexane/2-propanol = 95:5, flow rate 1.0 mL/min, detection at 254 nm):  $t_{\text{major}} = 8.4$  min,  $t_{\text{minor}} = 10.3$  min; 96% *ee*. M.p. 57–58 °C;  $[\alpha]_{\text{D}}^{25} -10.0$  (*c* 2.03, CH<sub>2</sub>Cl<sub>2</sub>); <sup>1</sup>H NMR (400 MHz, CDCl<sub>3</sub>):  $\delta$  8.87 (d, *J* = 8.8 Hz, 1H, ArH), 8.10 (d, *J* = 6.8 Hz, 1H, ArH), 7.99 (d, *J* = 8.0 Hz, 1H, ArH), 7.86 (d, *J* = 8.0 Hz, 1H, ArH), 7.58 (t, *J* = 7.8 Hz, 1H, ArH), 7.52 (d, *J* = 7.6 Hz, 1H, ArH), 7.48 (t, *J* = 7.8 Hz, 1H, ArH), 7.28 (d, *J* = 7.6 Hz, 1H, ArH), 7.07–7.02 (m, 4H, ArH), 6.96–6.94 (m, 2H, ArH), 6.67 (t, *J* = 7.4 Hz, 1H, ArH), 6.18 (t, *J* = 8.0 Hz, 1H, ArH), 4.53 (dd, *J*<sub>1</sub> = 11.2 Hz, *J*<sub>2</sub> = 5.6 Hz, 1H, CH), 4.27 (dd, *J*<sub>1</sub> = 11.2 Hz, *J*<sub>2</sub> = 8.8 Hz, 1H, CH), 3.47 (d, *J* = 9.2 Hz, 1H, CH), 3.35 (d, *J* = 9.6 Hz, 1H, CH), 3.18–3.14 (m, 2H, CH<sub>2</sub>), 3.07 (d, *J* = 9.6 Hz, 1H, CH<sub>2</sub>), 3.01–2.95 (m, 1H, CH<sub>2</sub>), 2.76 (d, *J* = 9.6 Hz, 1H, CH<sub>2</sub>), 2.65–2.59 (m, 1H, CH<sub>2</sub>), 2.40 (s, 3H, CH<sub>3</sub>), 2.38 (s, 4H, CH<sub>2</sub> + CH<sub>3</sub>), 2.19–2.15 (m, 1H, CH<sub>2</sub>) ppm; <sup>13</sup>C NMR (100 MHz, CDCl<sub>3</sub>):  $\delta$  167.3, 154.3, 139.0, 133.8, 133.2, 131.3, 129.9, 129.3, 128.4, 128.1, 127.6, 127.5, 127.3, 126.6, 126.2, 125.8, 125.4, 124.4, 116.5, 107.2, 66.7, 63.5, 62.4, 62.2, 60.5, 60.2, 54.4, 48.7, 46.3, 41.7, 35.0 ppm; IR (KBr):  $\bar{\nu}$  3050, 2943, 2899, 2780, 1712, 1603, 1509, 1492, 1454, 1349, 1277, 1243, 1196, 1135, 1033, 1010, 783, 738, 701 cm<sup>-1</sup>; HRMS (ESI): *m/z* calcd. for C<sub>34</sub>H<sub>35</sub>N<sub>2</sub>O<sub>2</sub> [M + H]<sup>+</sup> 503.2693, found 503.2694.

## References

1. (a) W. Yang and D.-M. Du, *Org. Lett.*, 2010, **12**, 5450; (b) W. Yang and D.-M. Du, *Adv. Synth. Catal.*, 2011, **353**, 1241.
2. B.-L. Zhao and D.-M. Du, *RSC Adv.*, 2014, **4**, 27346.
3. H. Y. Bae, S. Some, J. H. Lee, J.-Y. Kim, M. J. Song, S. Lee, Y. J. Zhang and C. E. Song, *Adv. Synth. Catal.*, 2011, **353**, 3196.
4. B. Vakulya, S. Varga, A. Csampai and T. Soós, *Org. Lett.*, 2005, **7**, 1967.
5. (a) W.-L. Yang, Y.-Z. Liu, S. Luo, X. Yu, J. S. Fossey and W.-P. Deng, *Chem. Commun.*, 2015, **51**, 9212; (b) Y. Liu and W. Zhang, *Angew. Chem. Int. Ed.*, 2013, **52**, 2203.



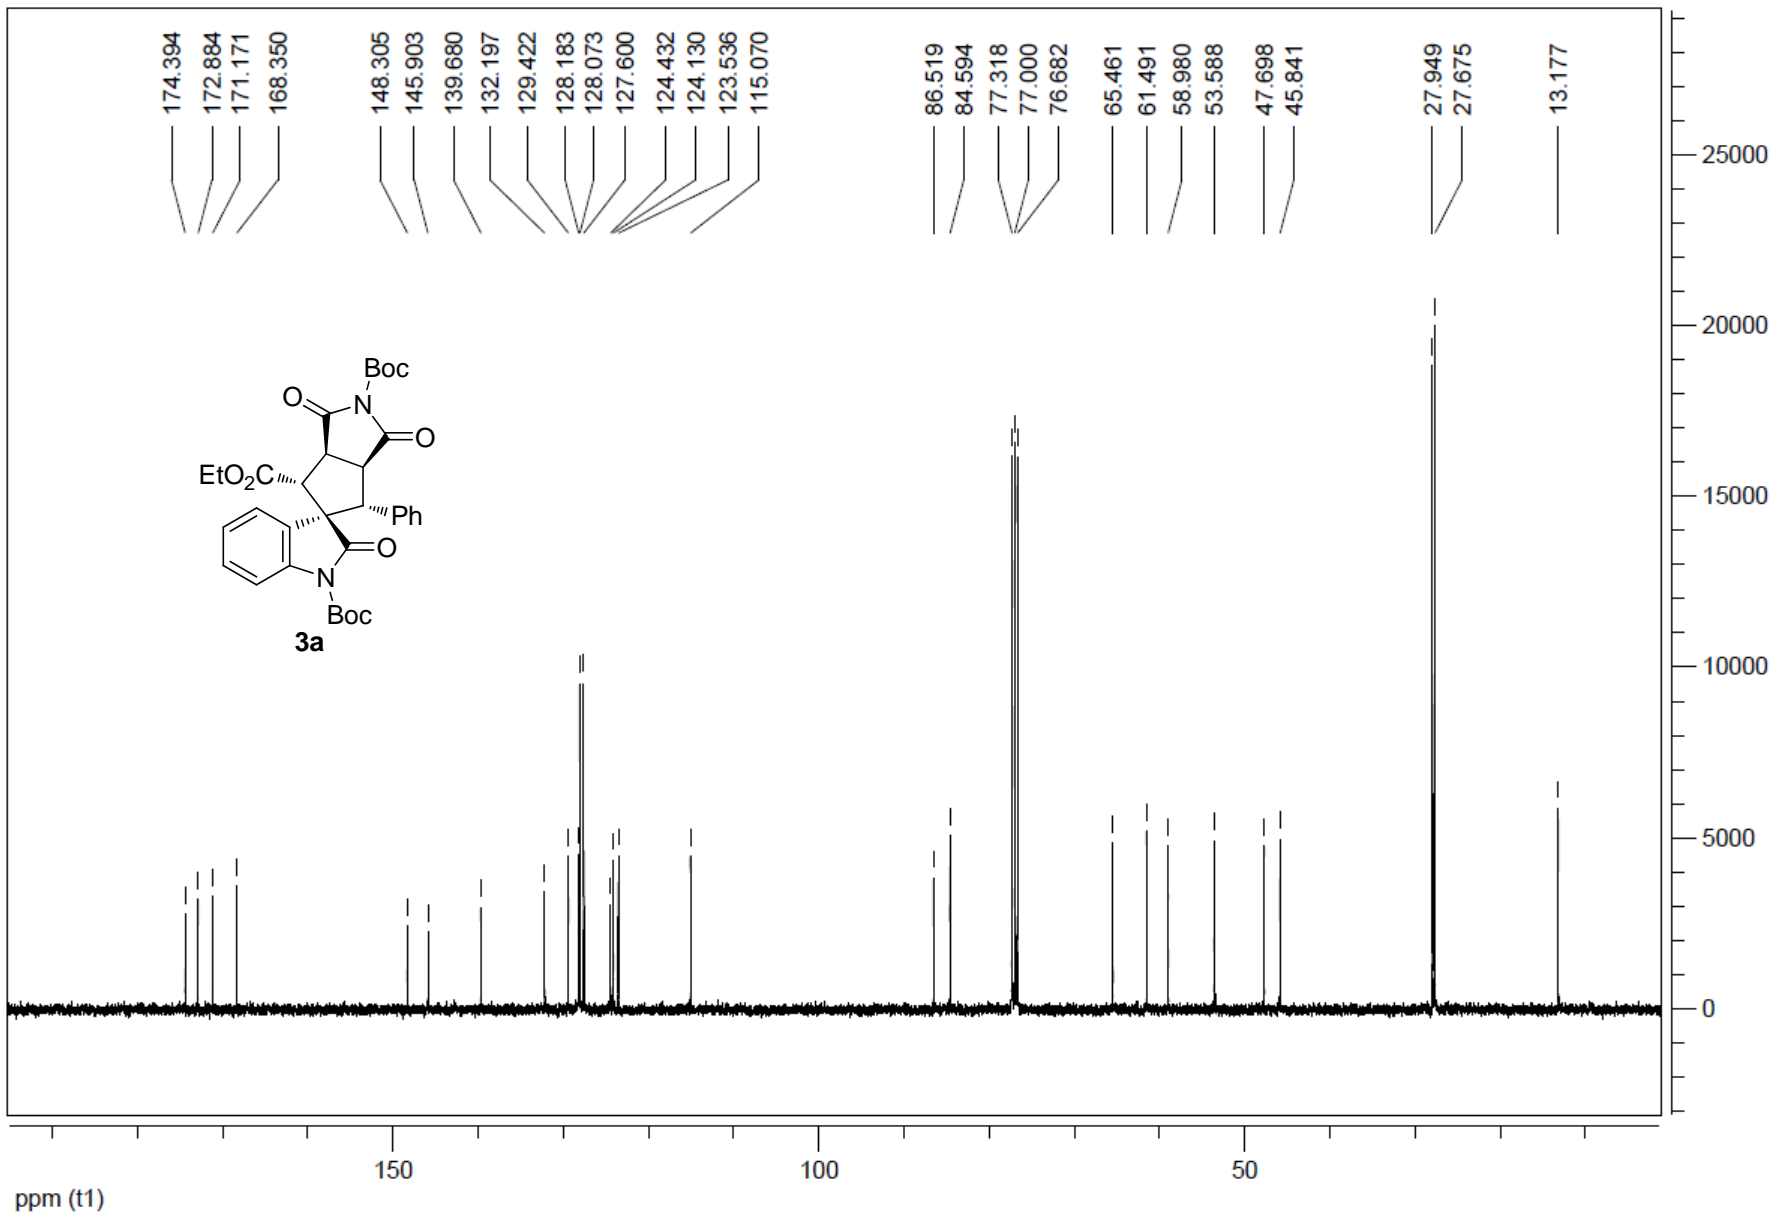



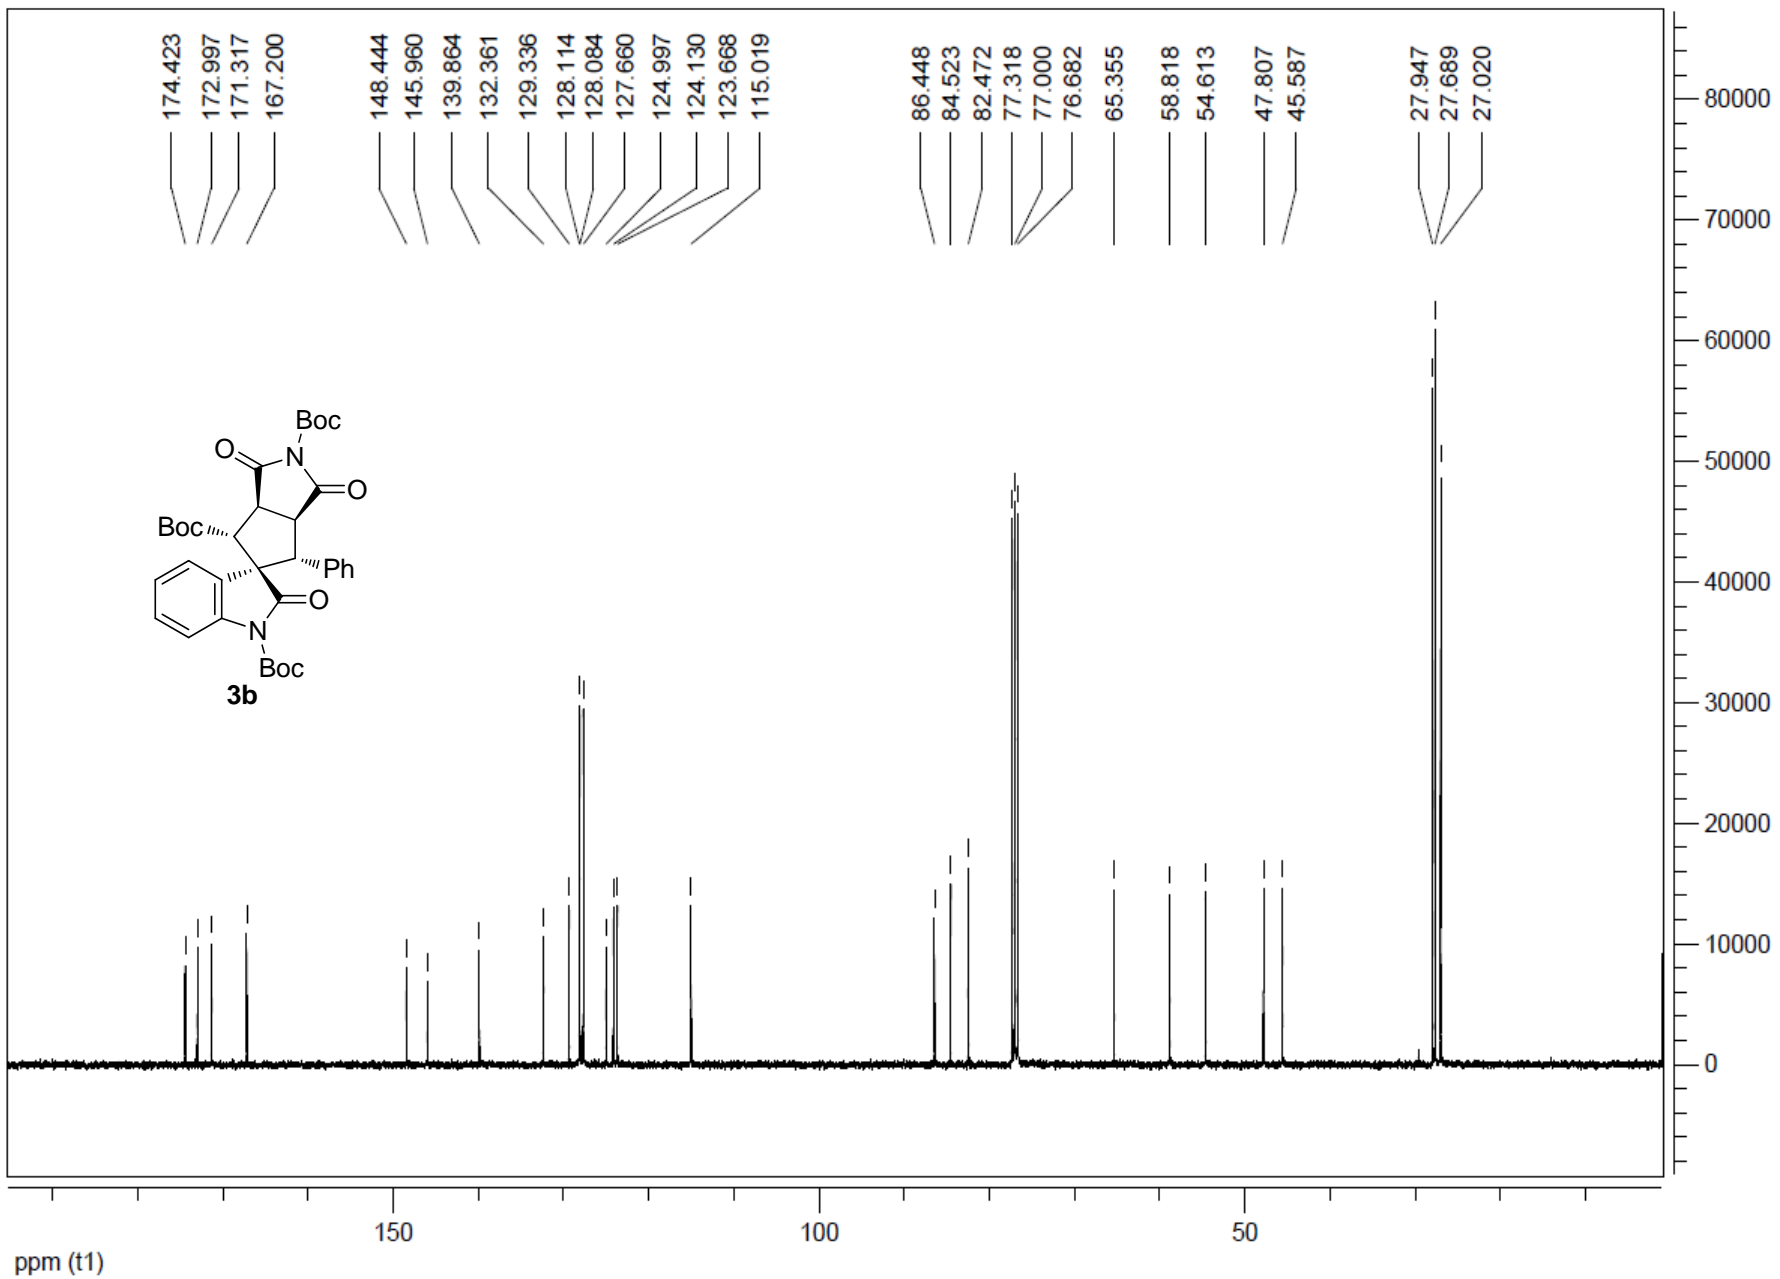



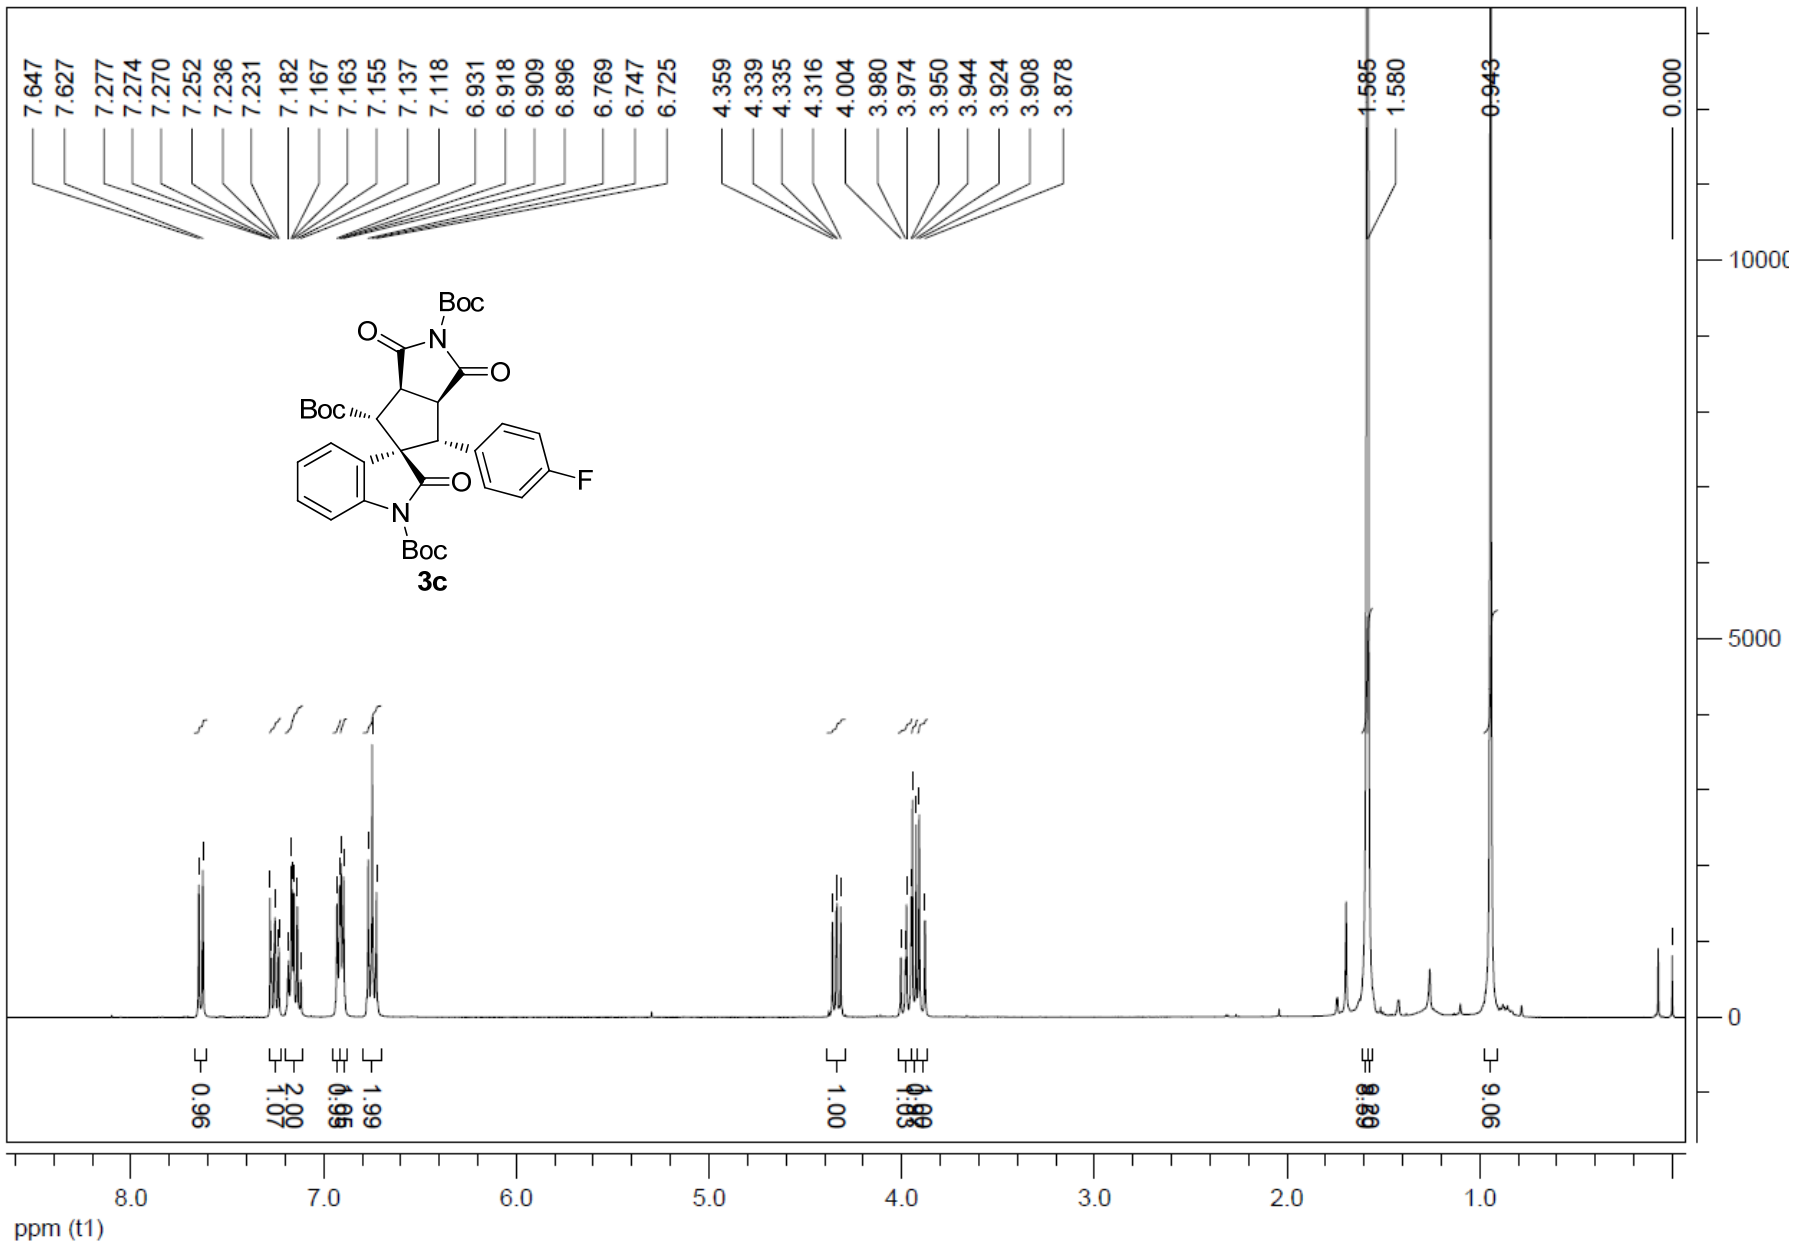

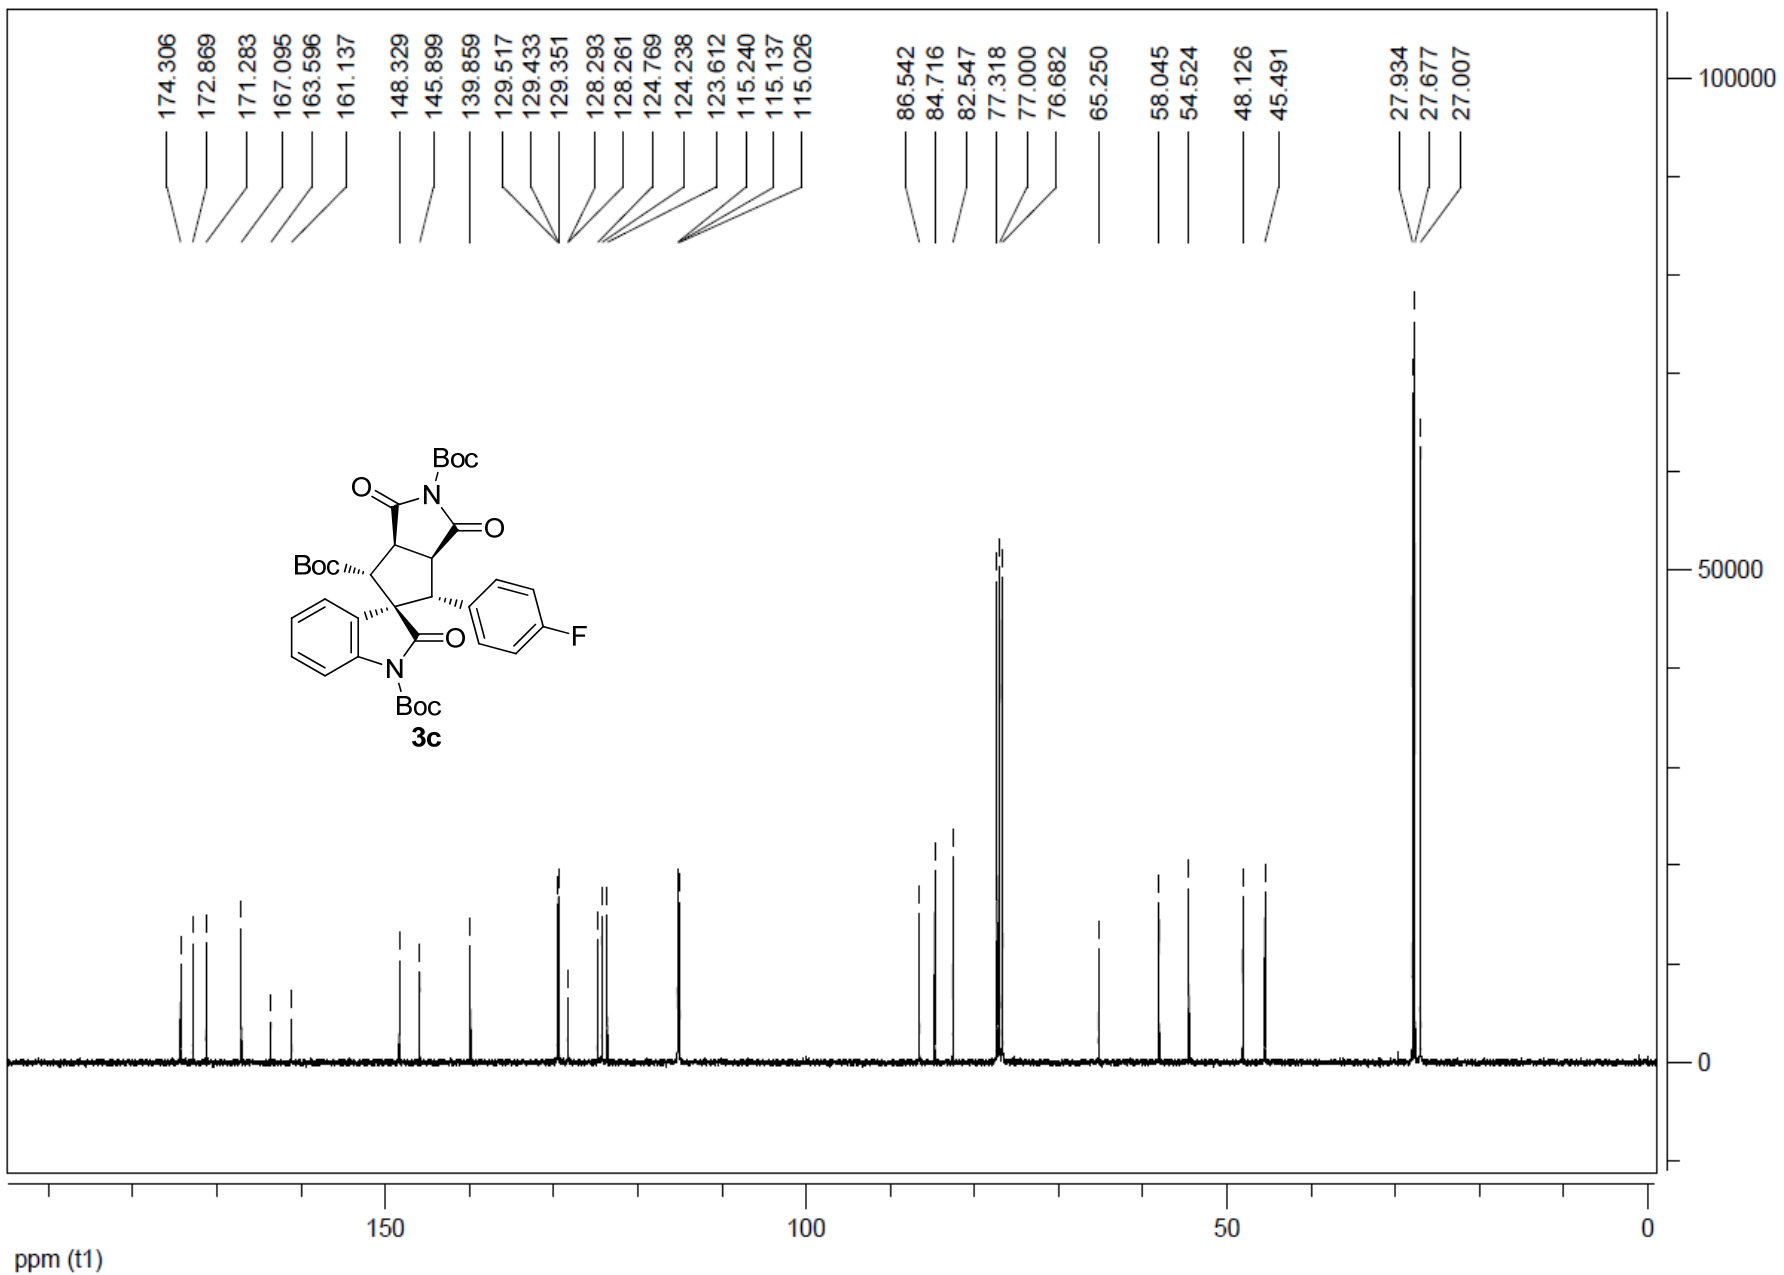

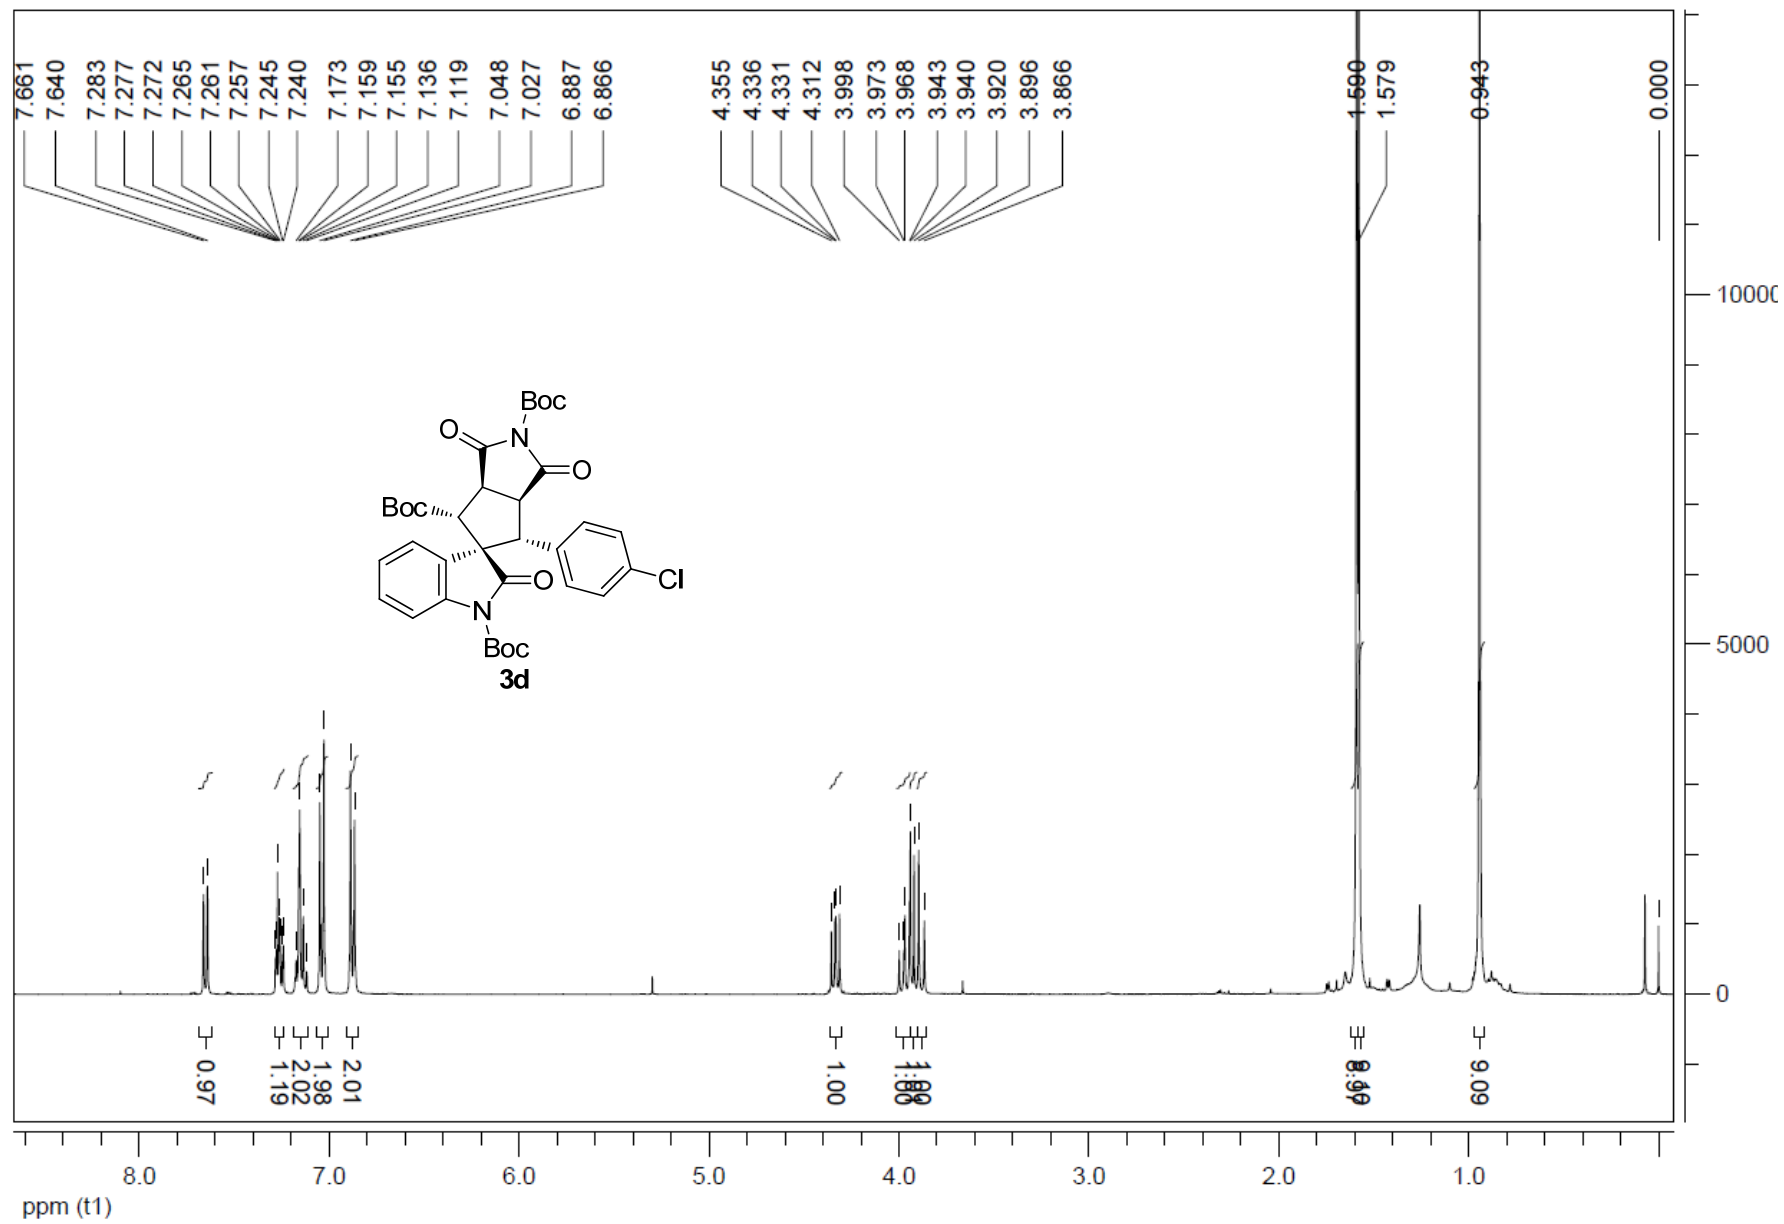

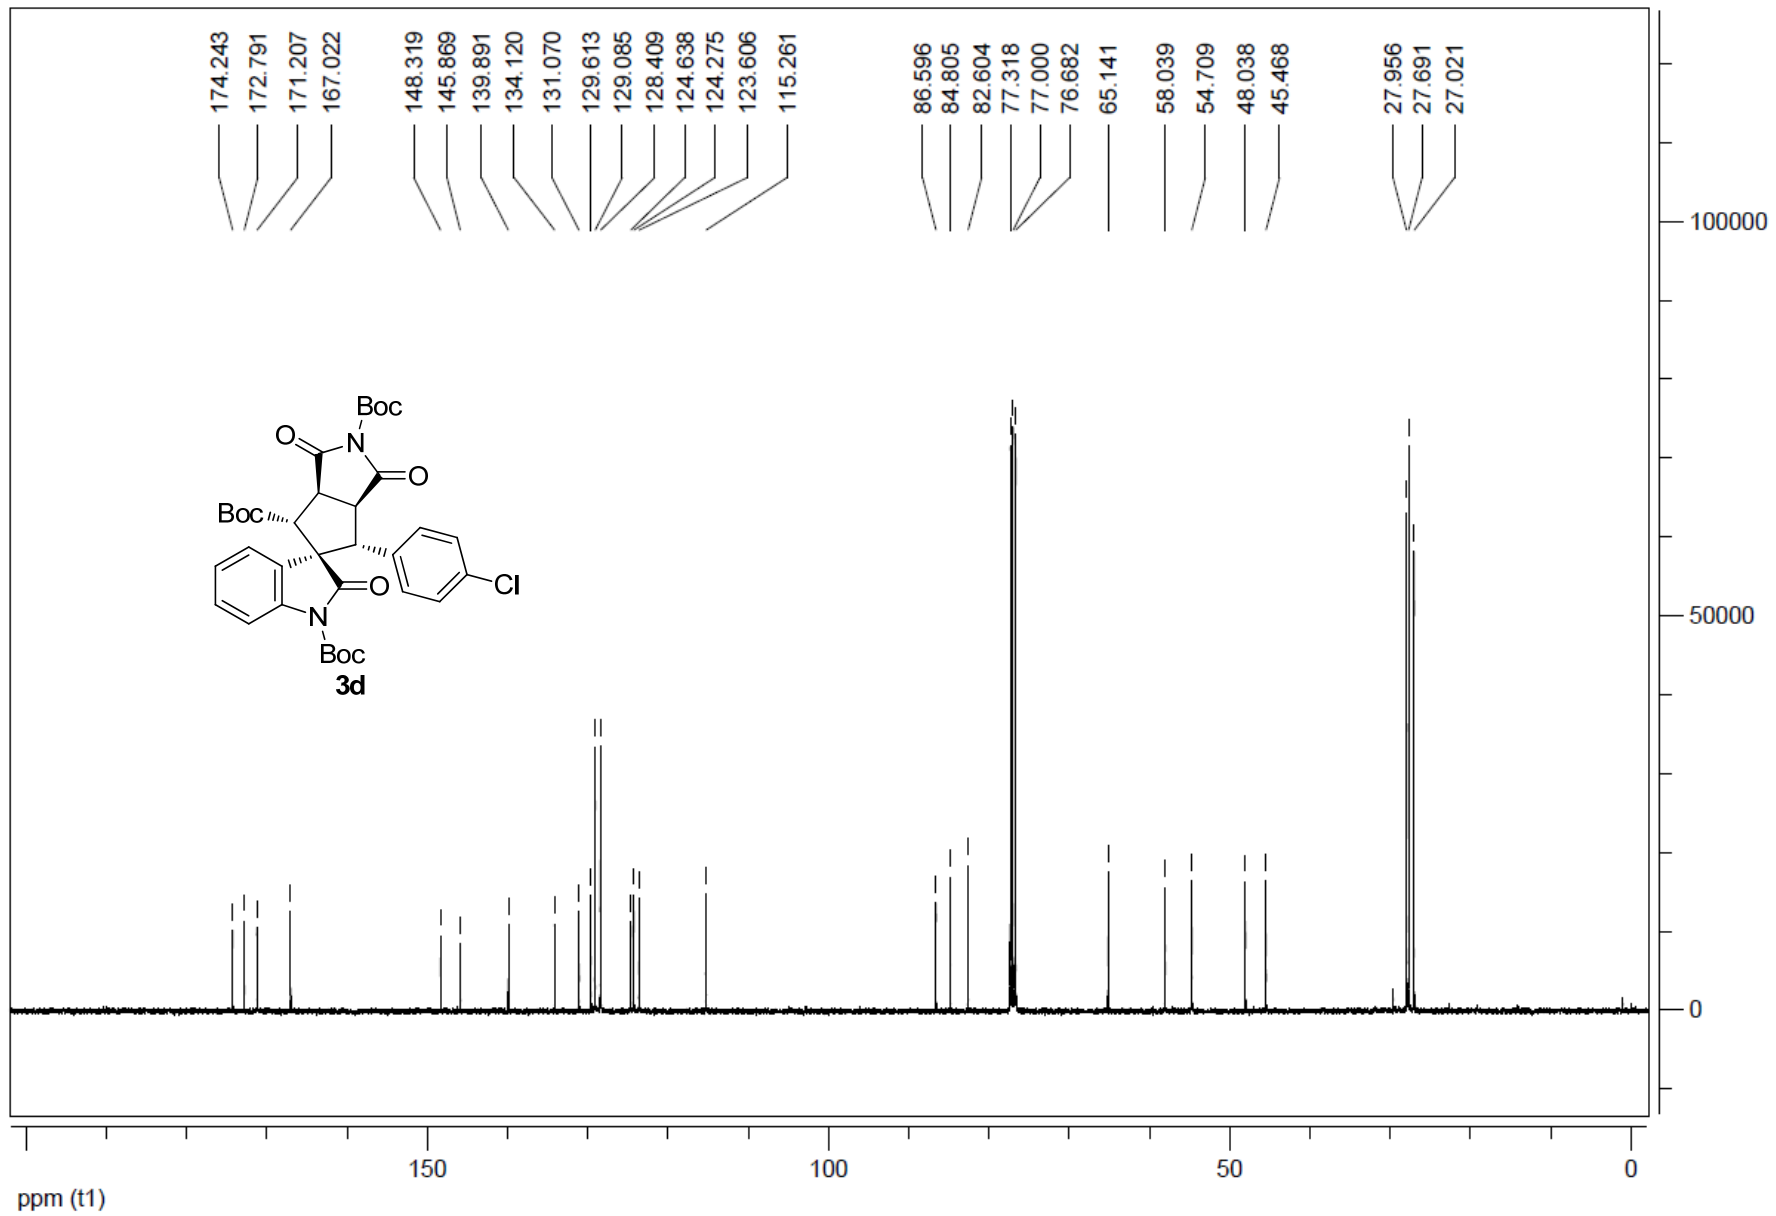

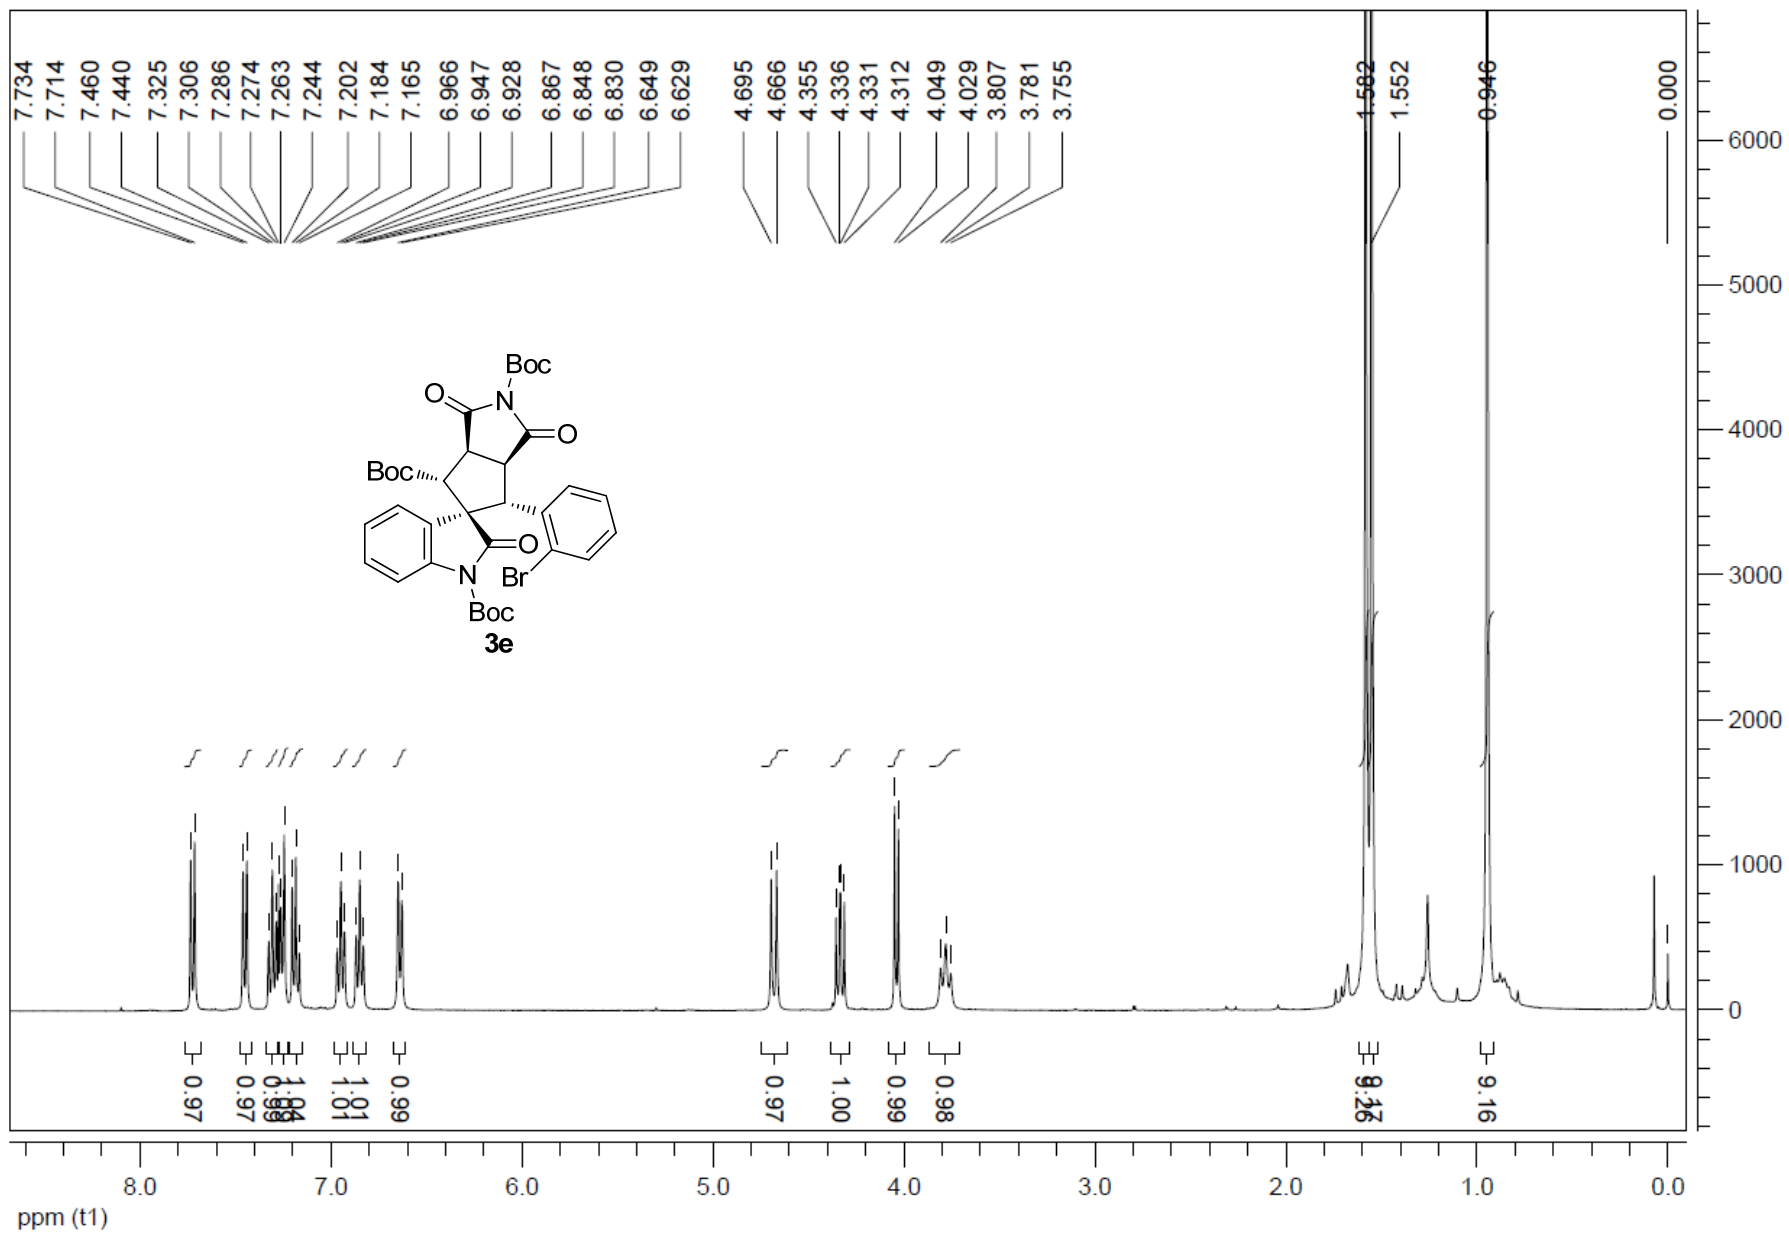

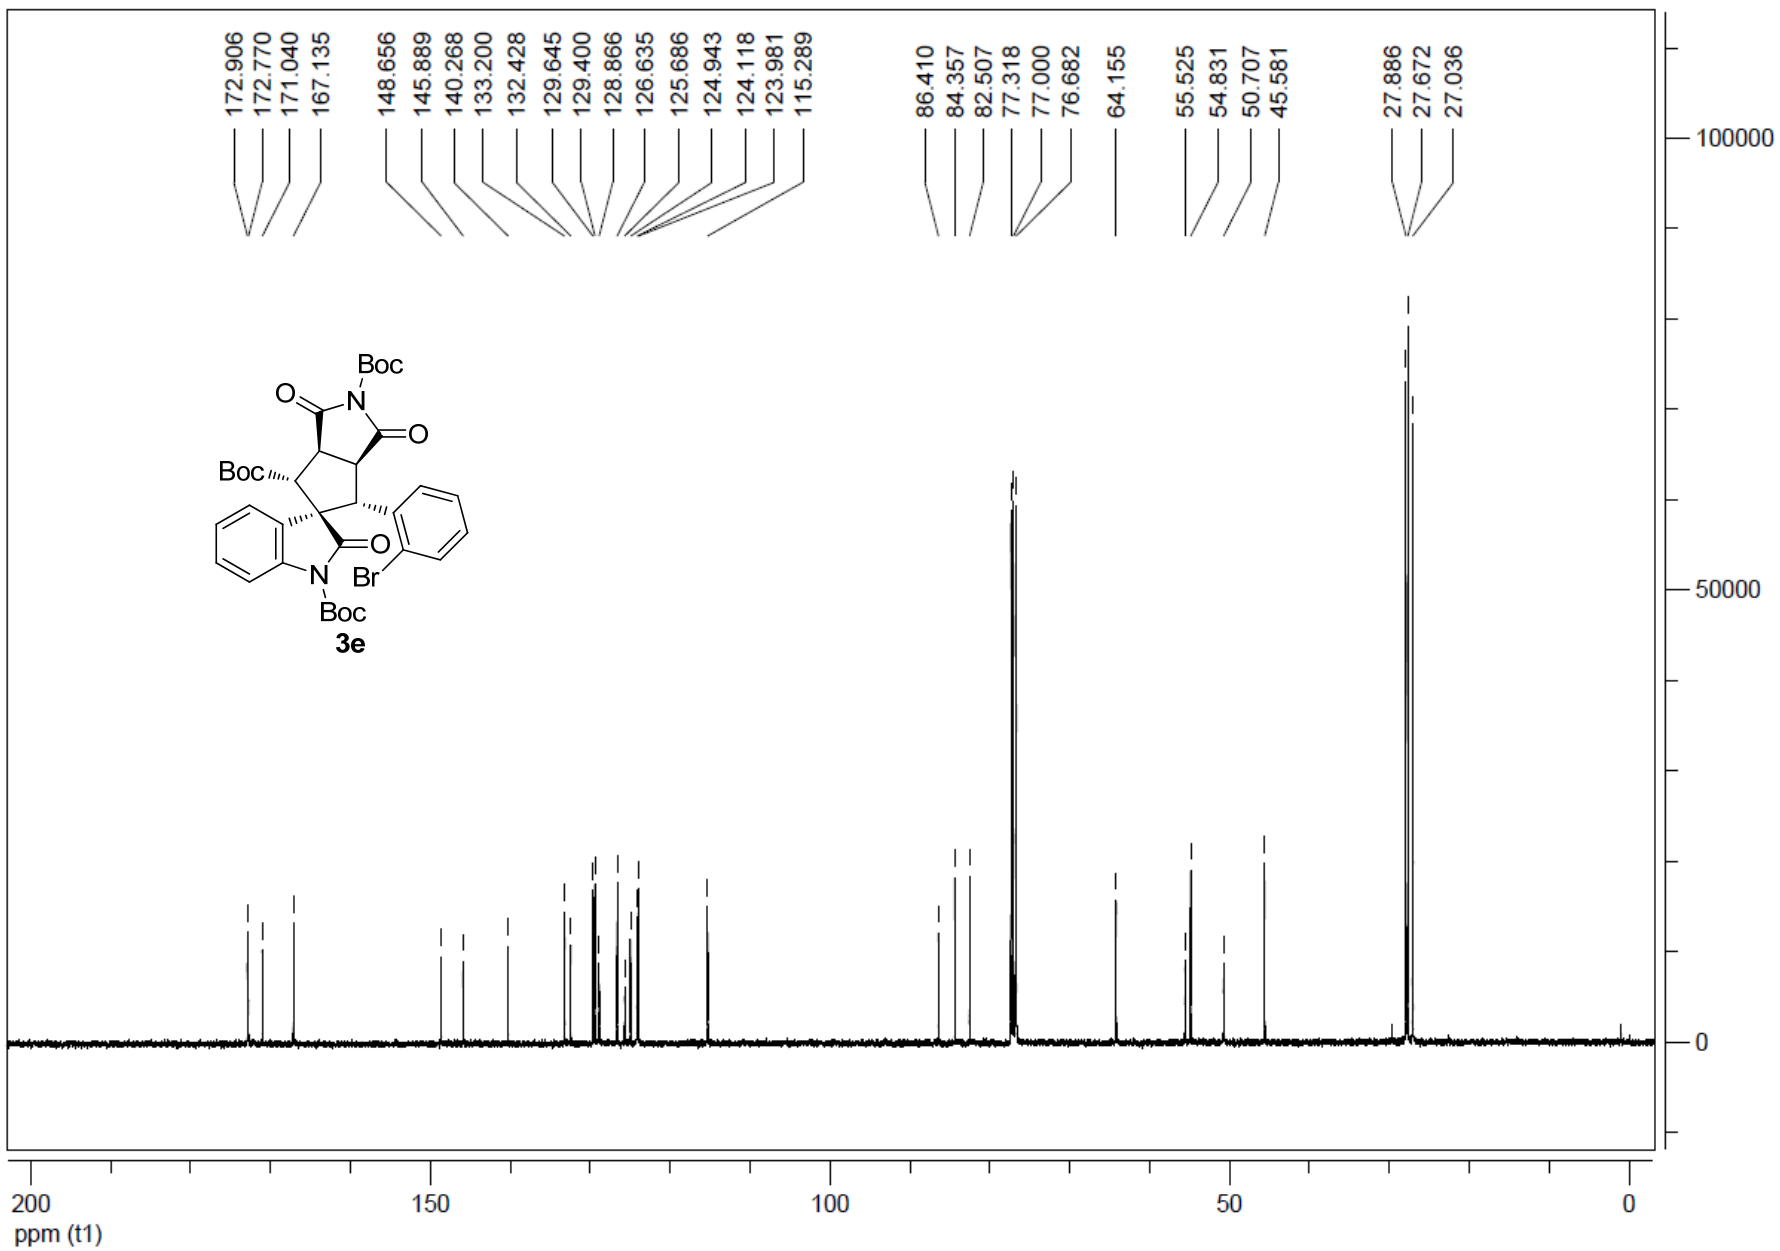



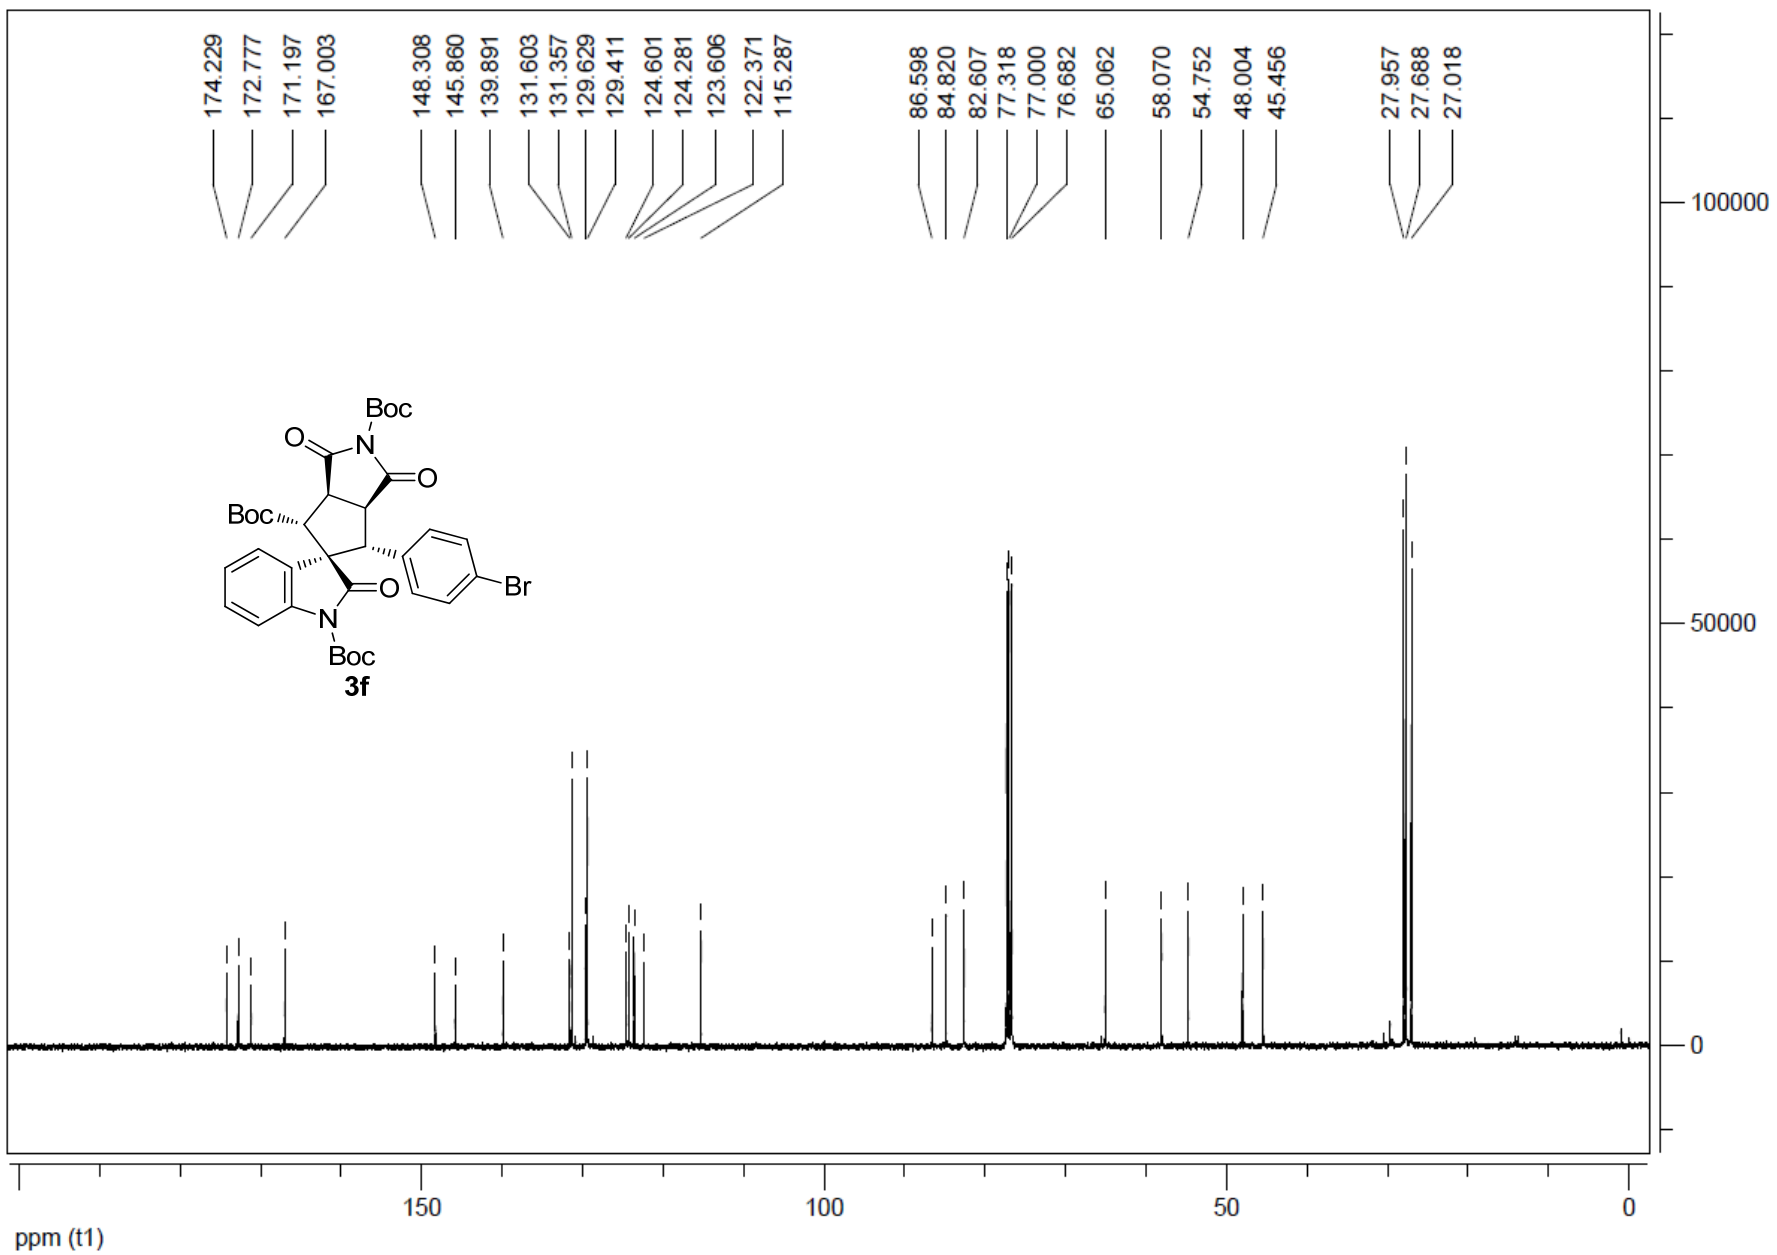



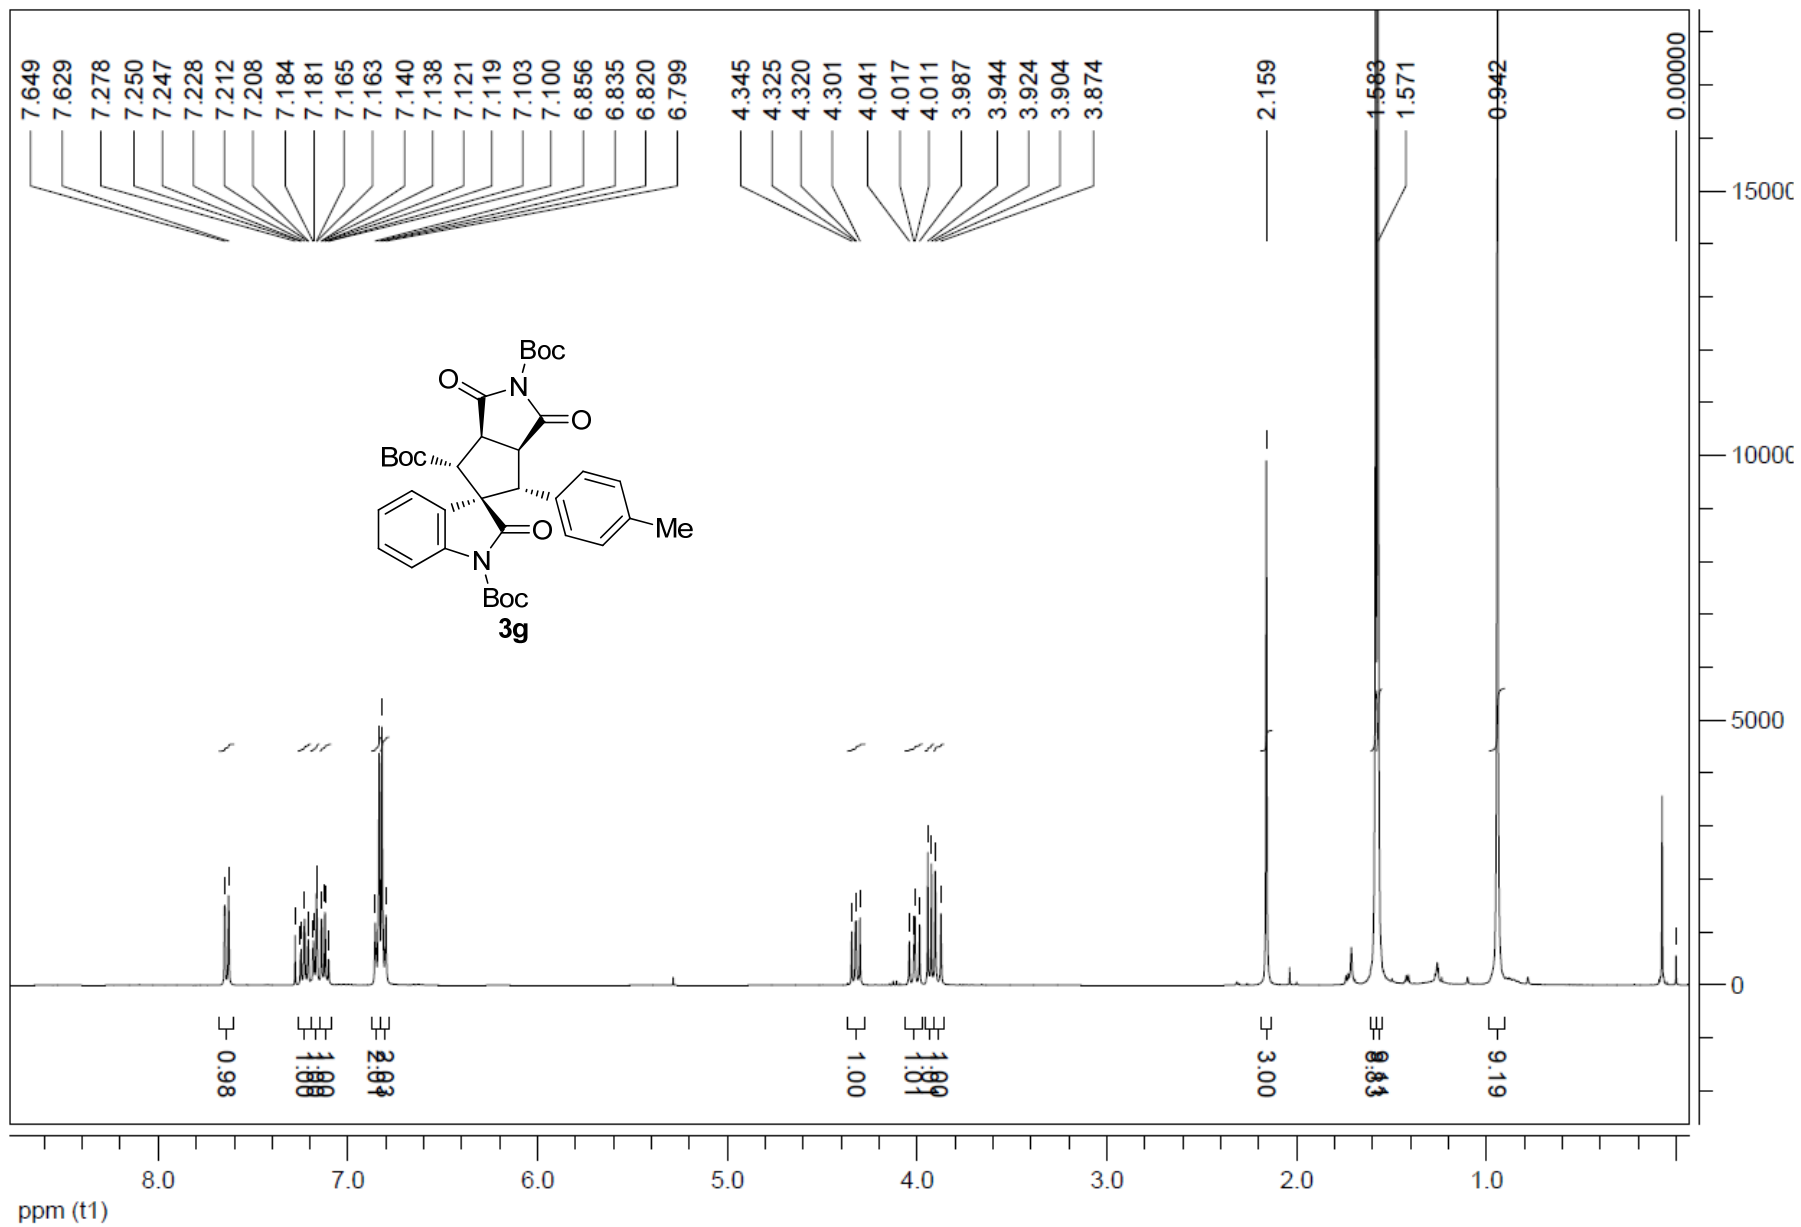

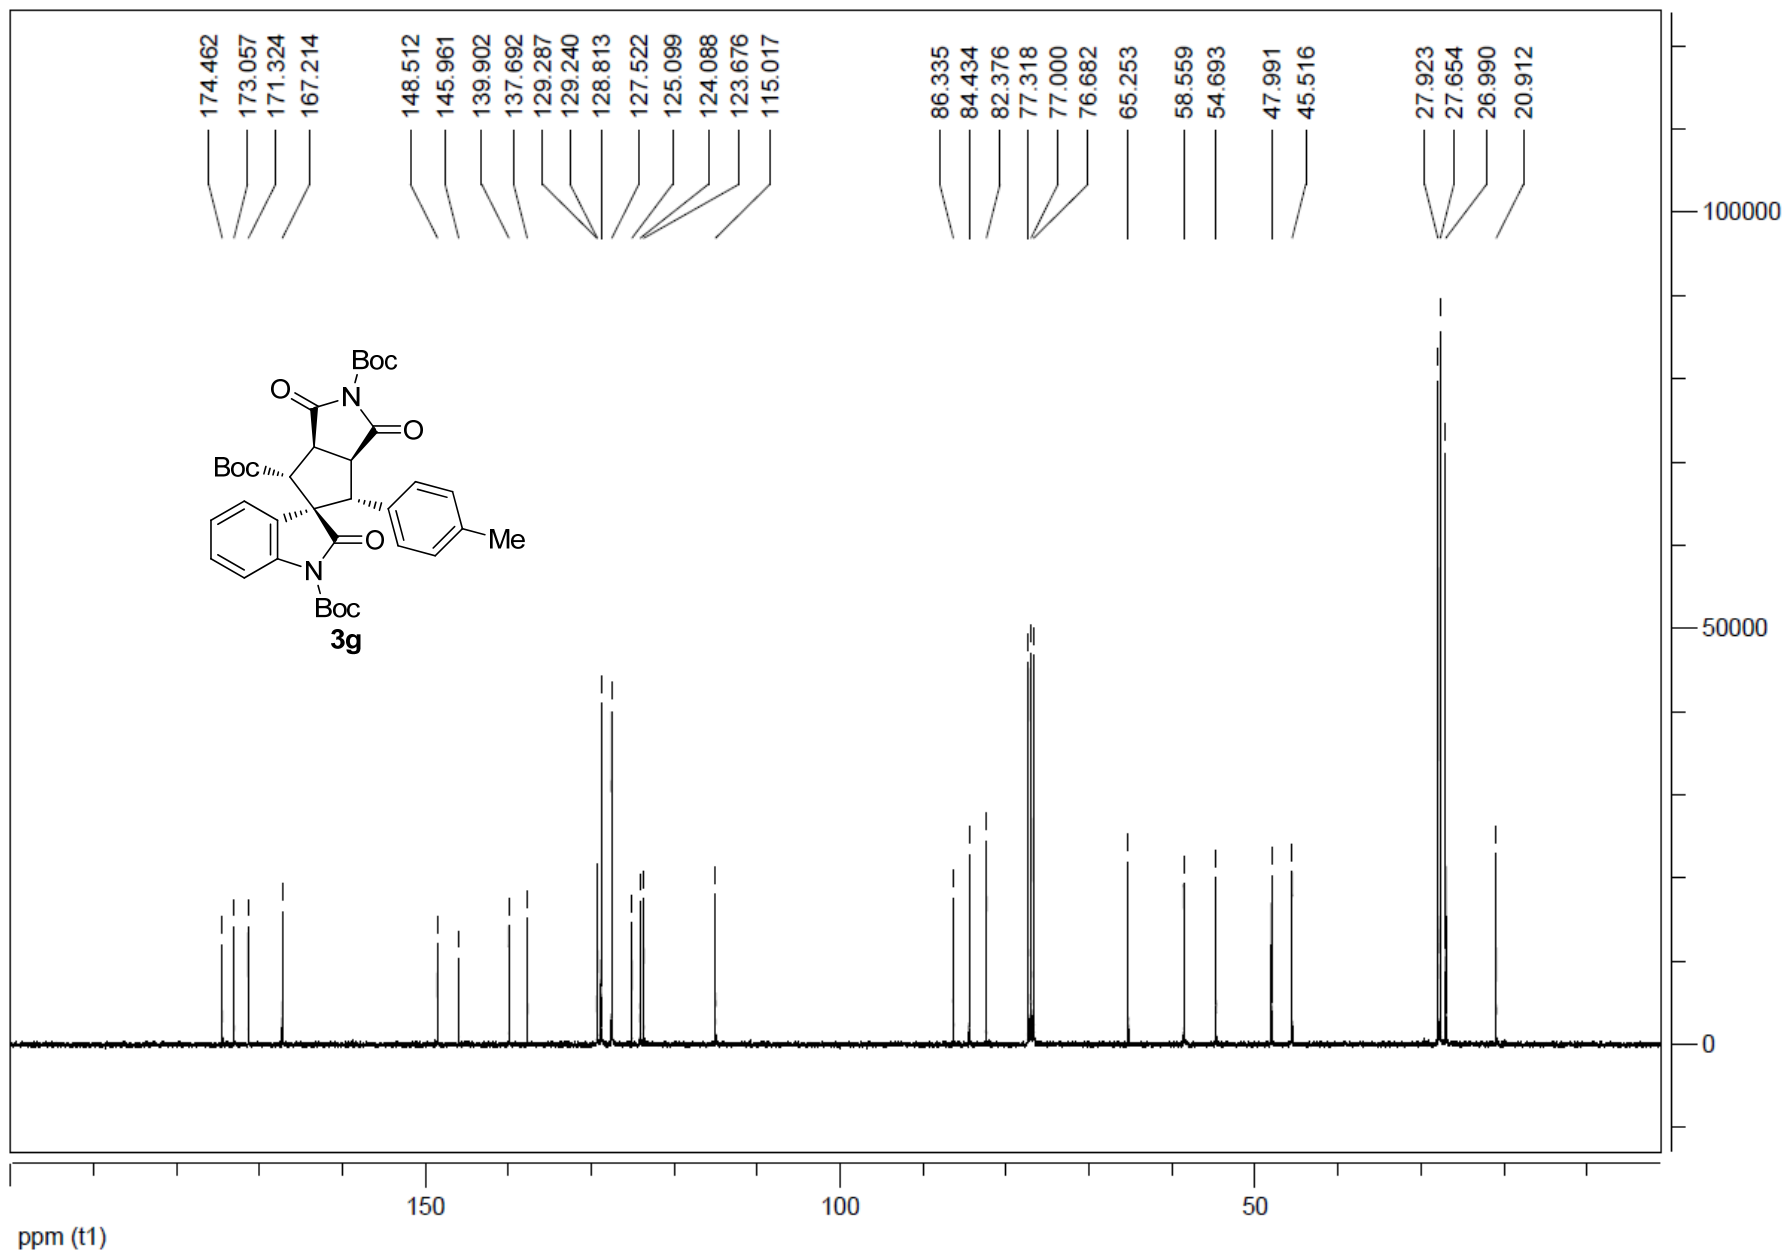

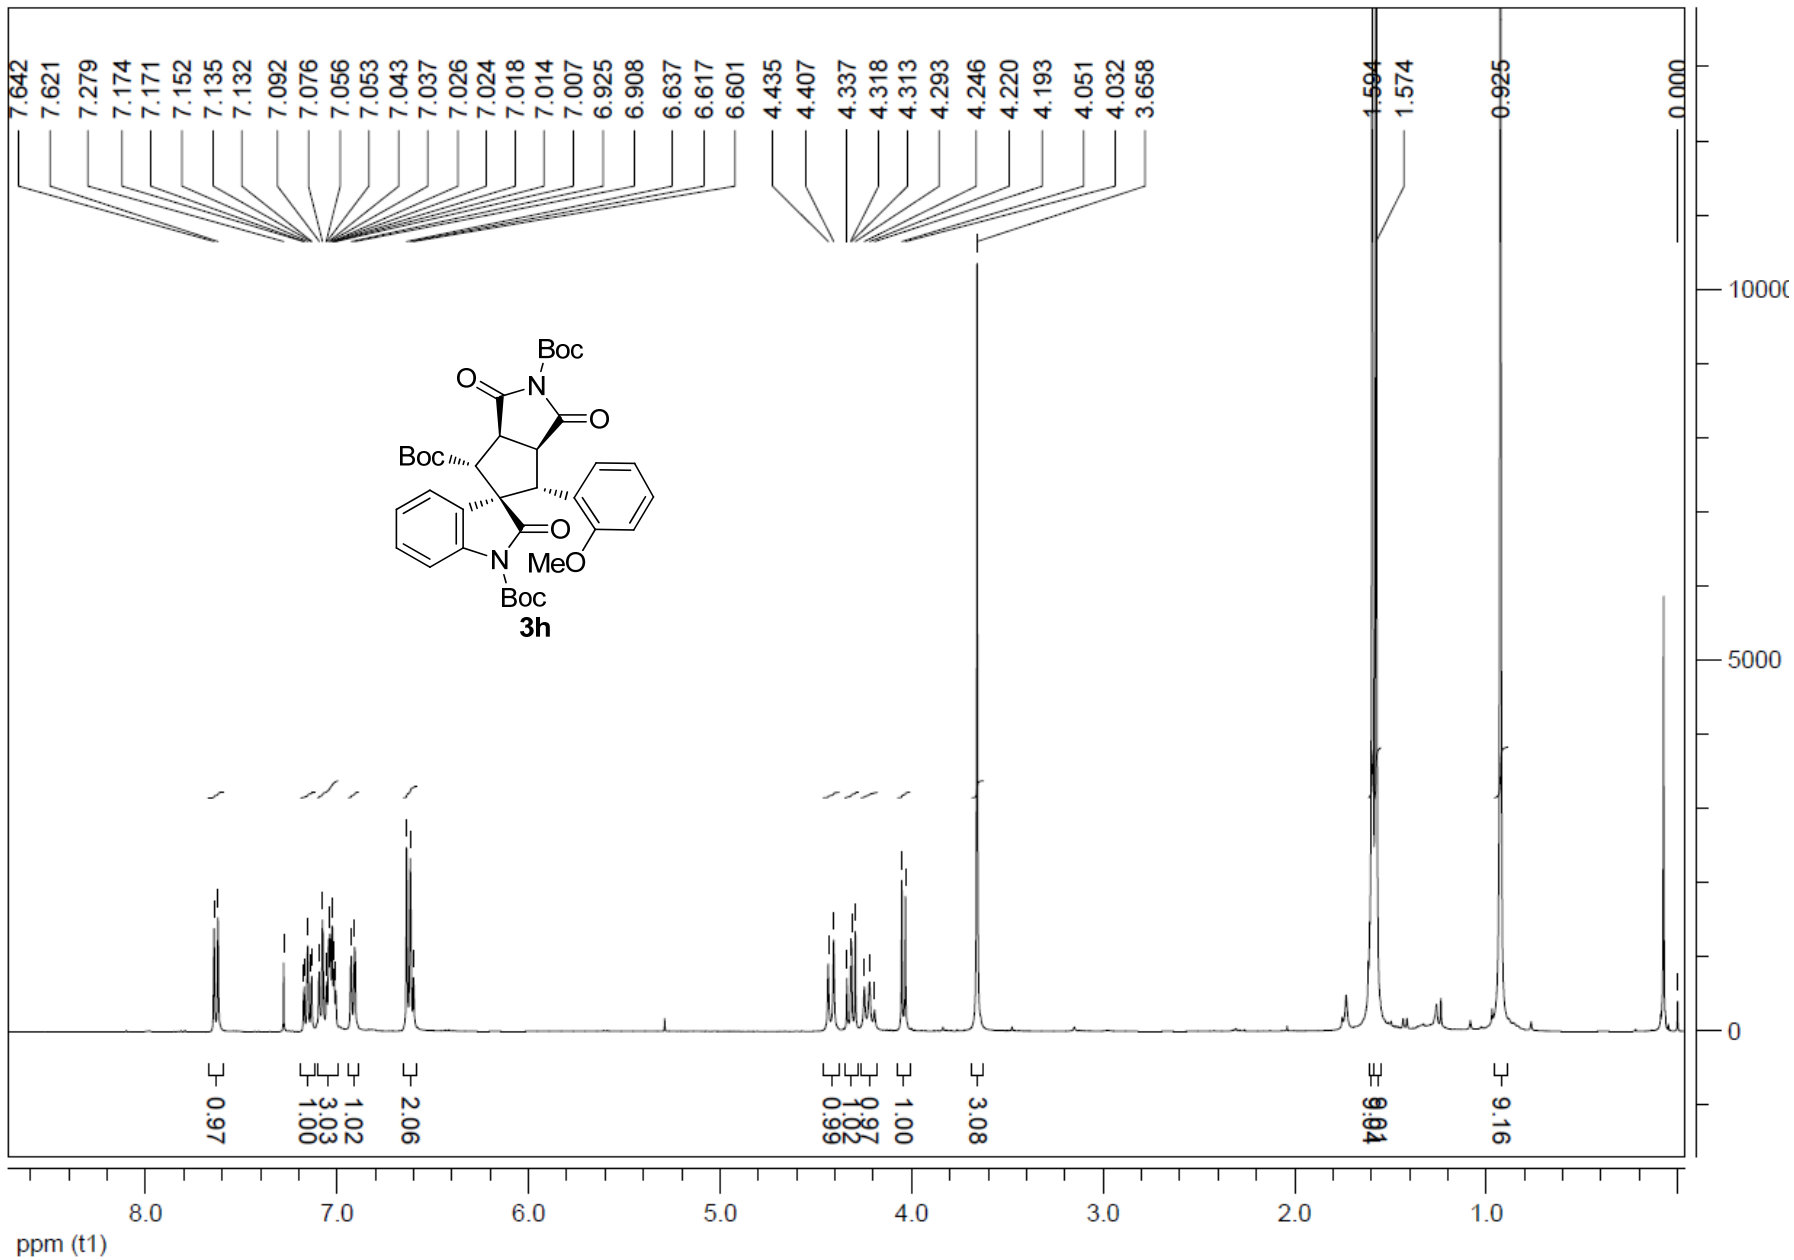

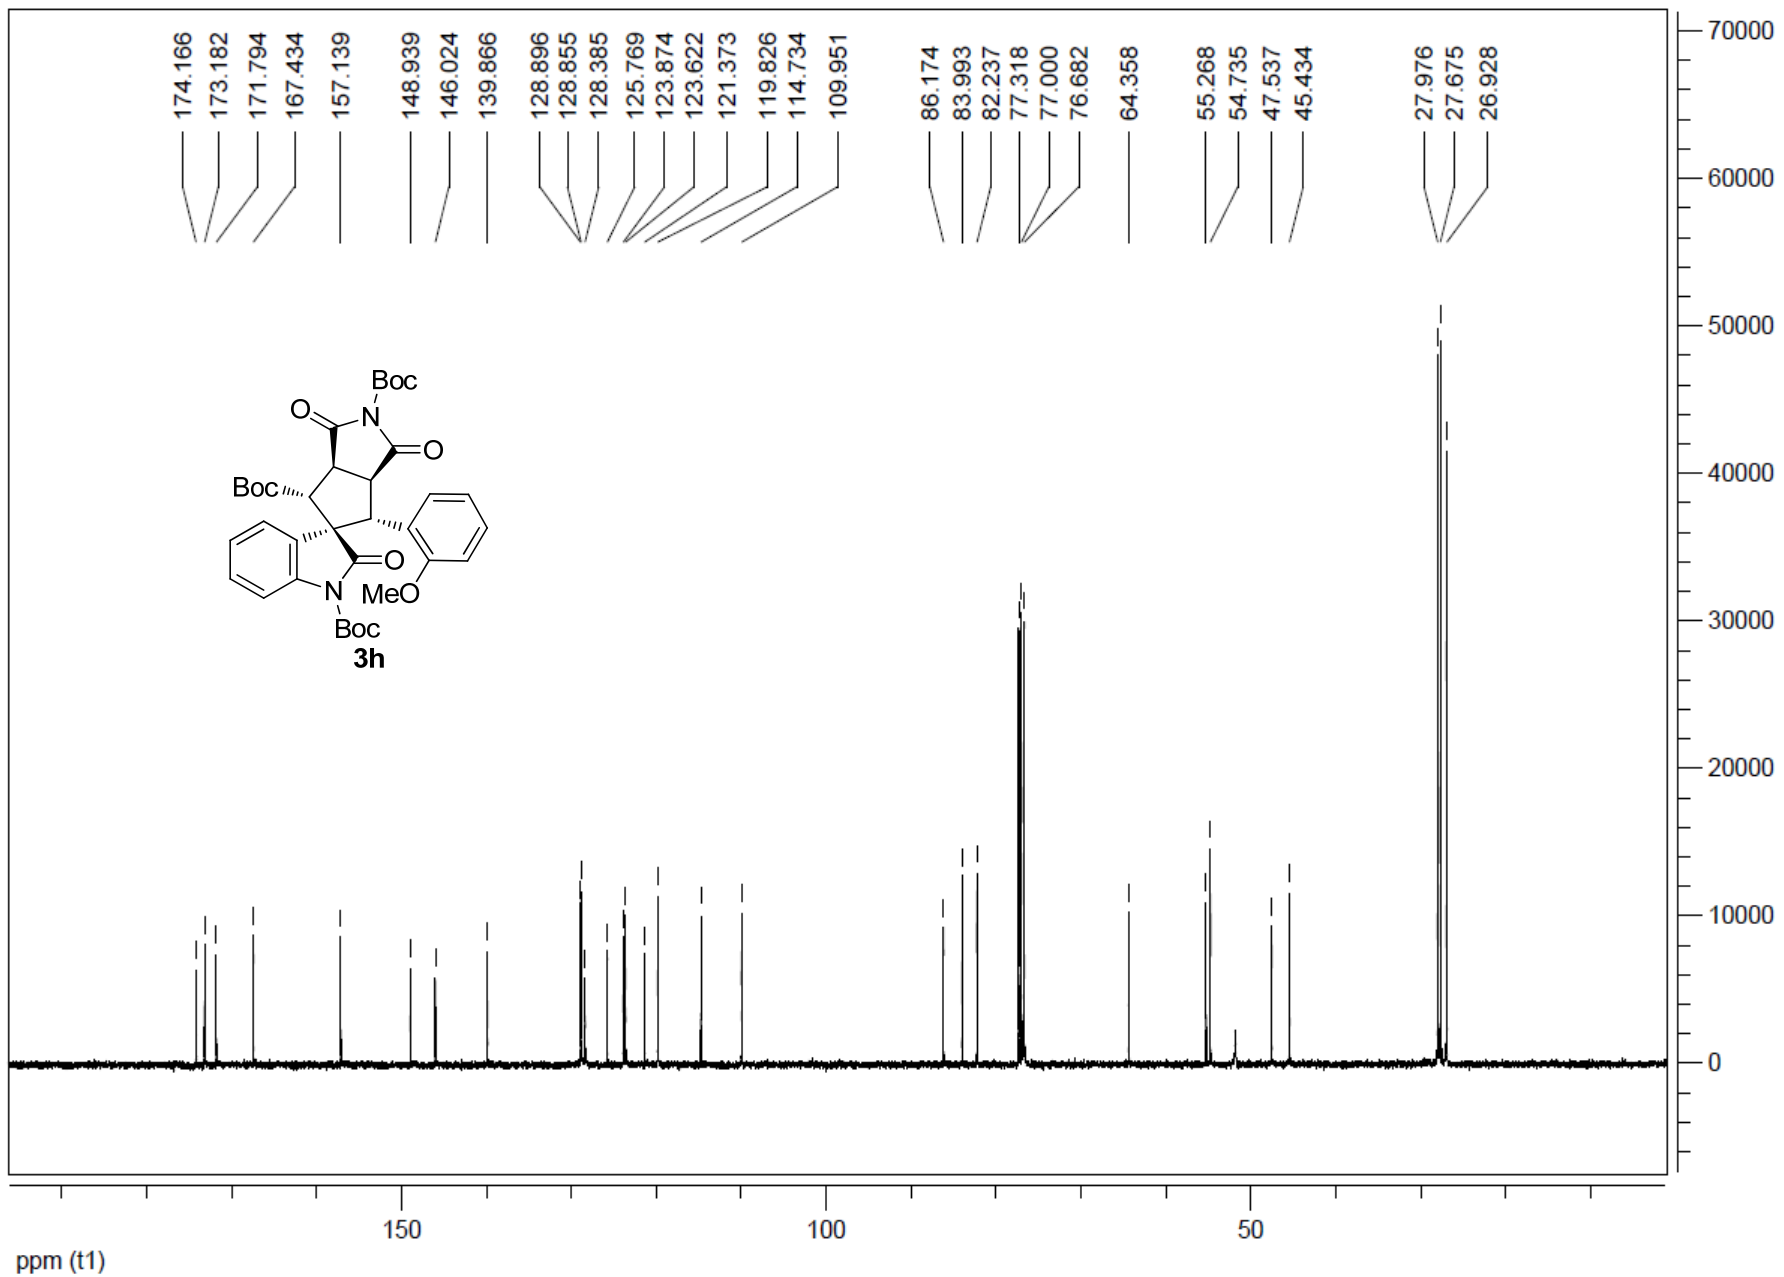

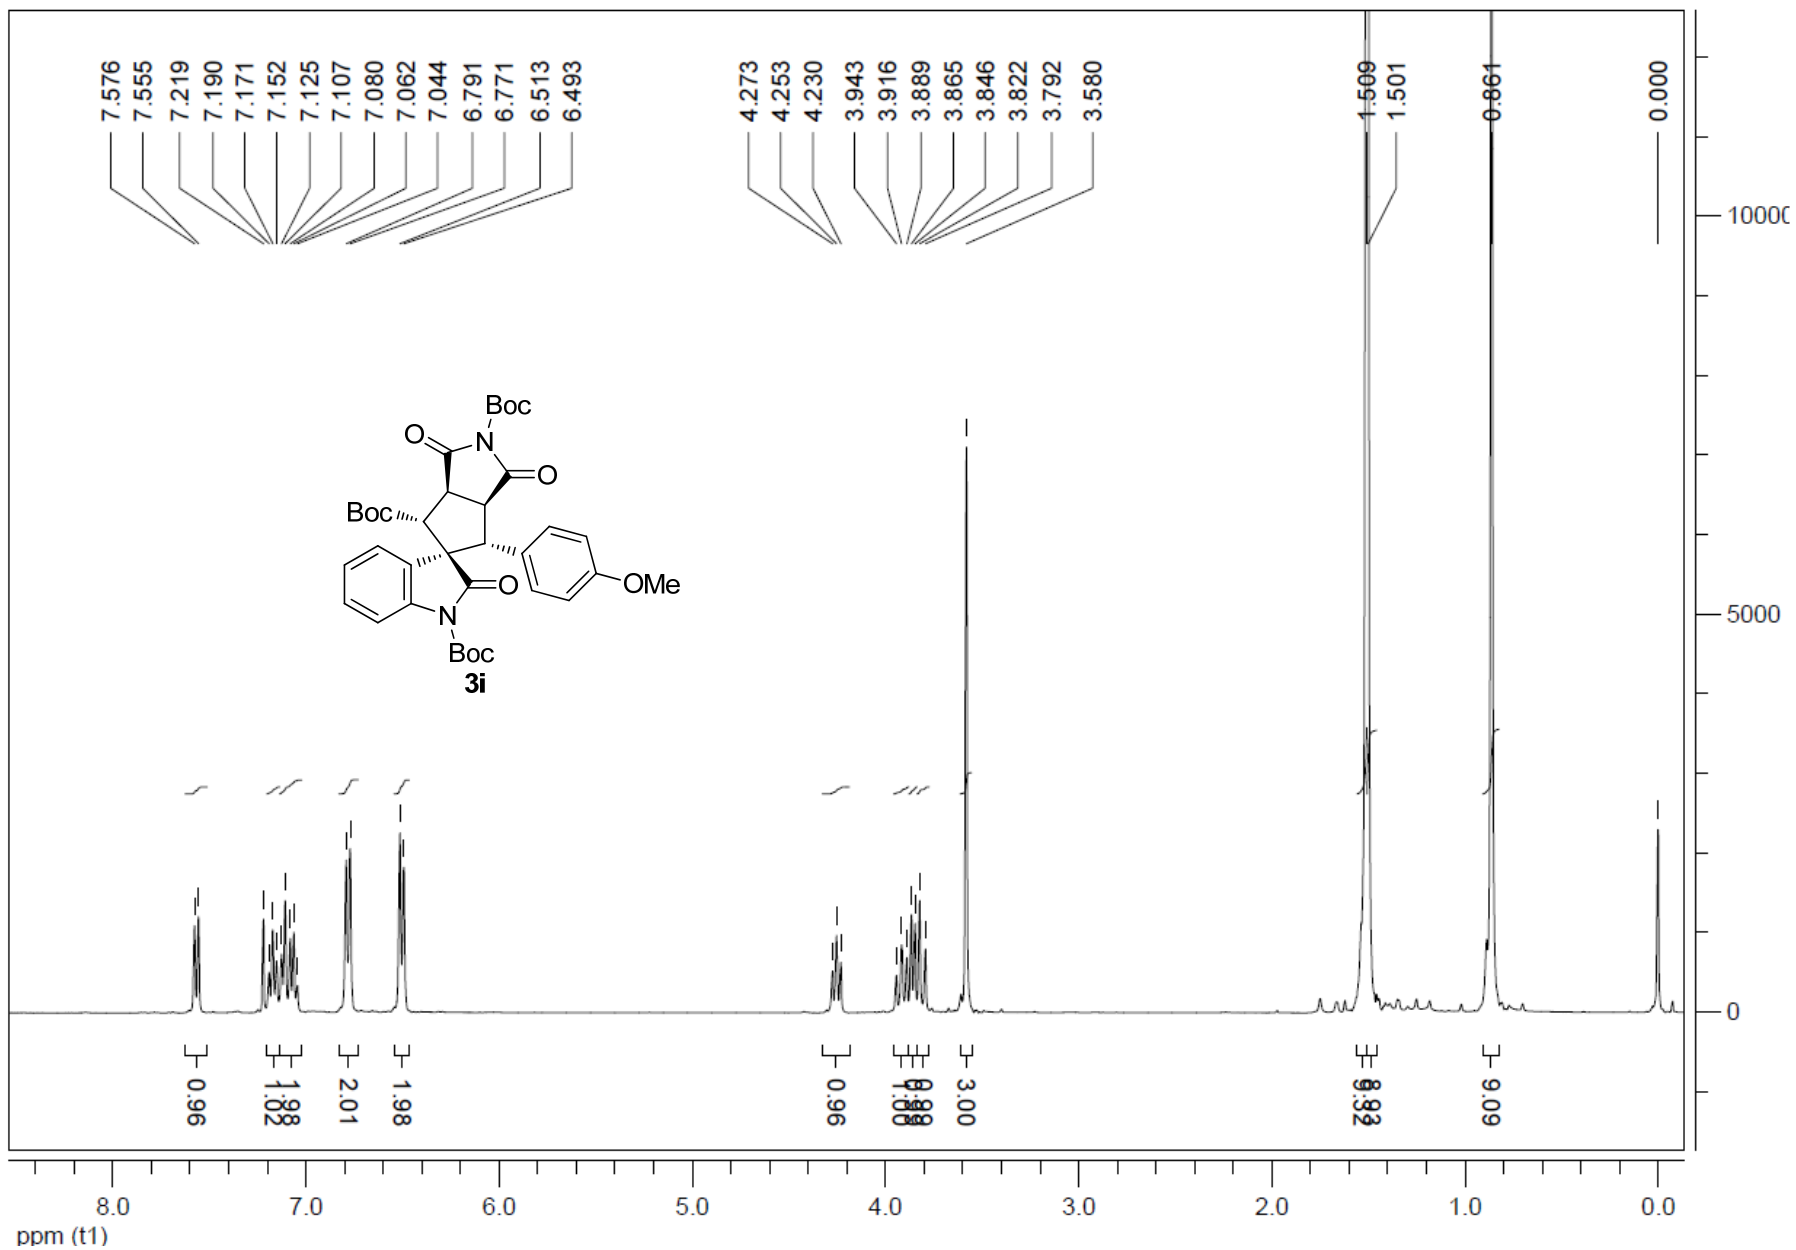





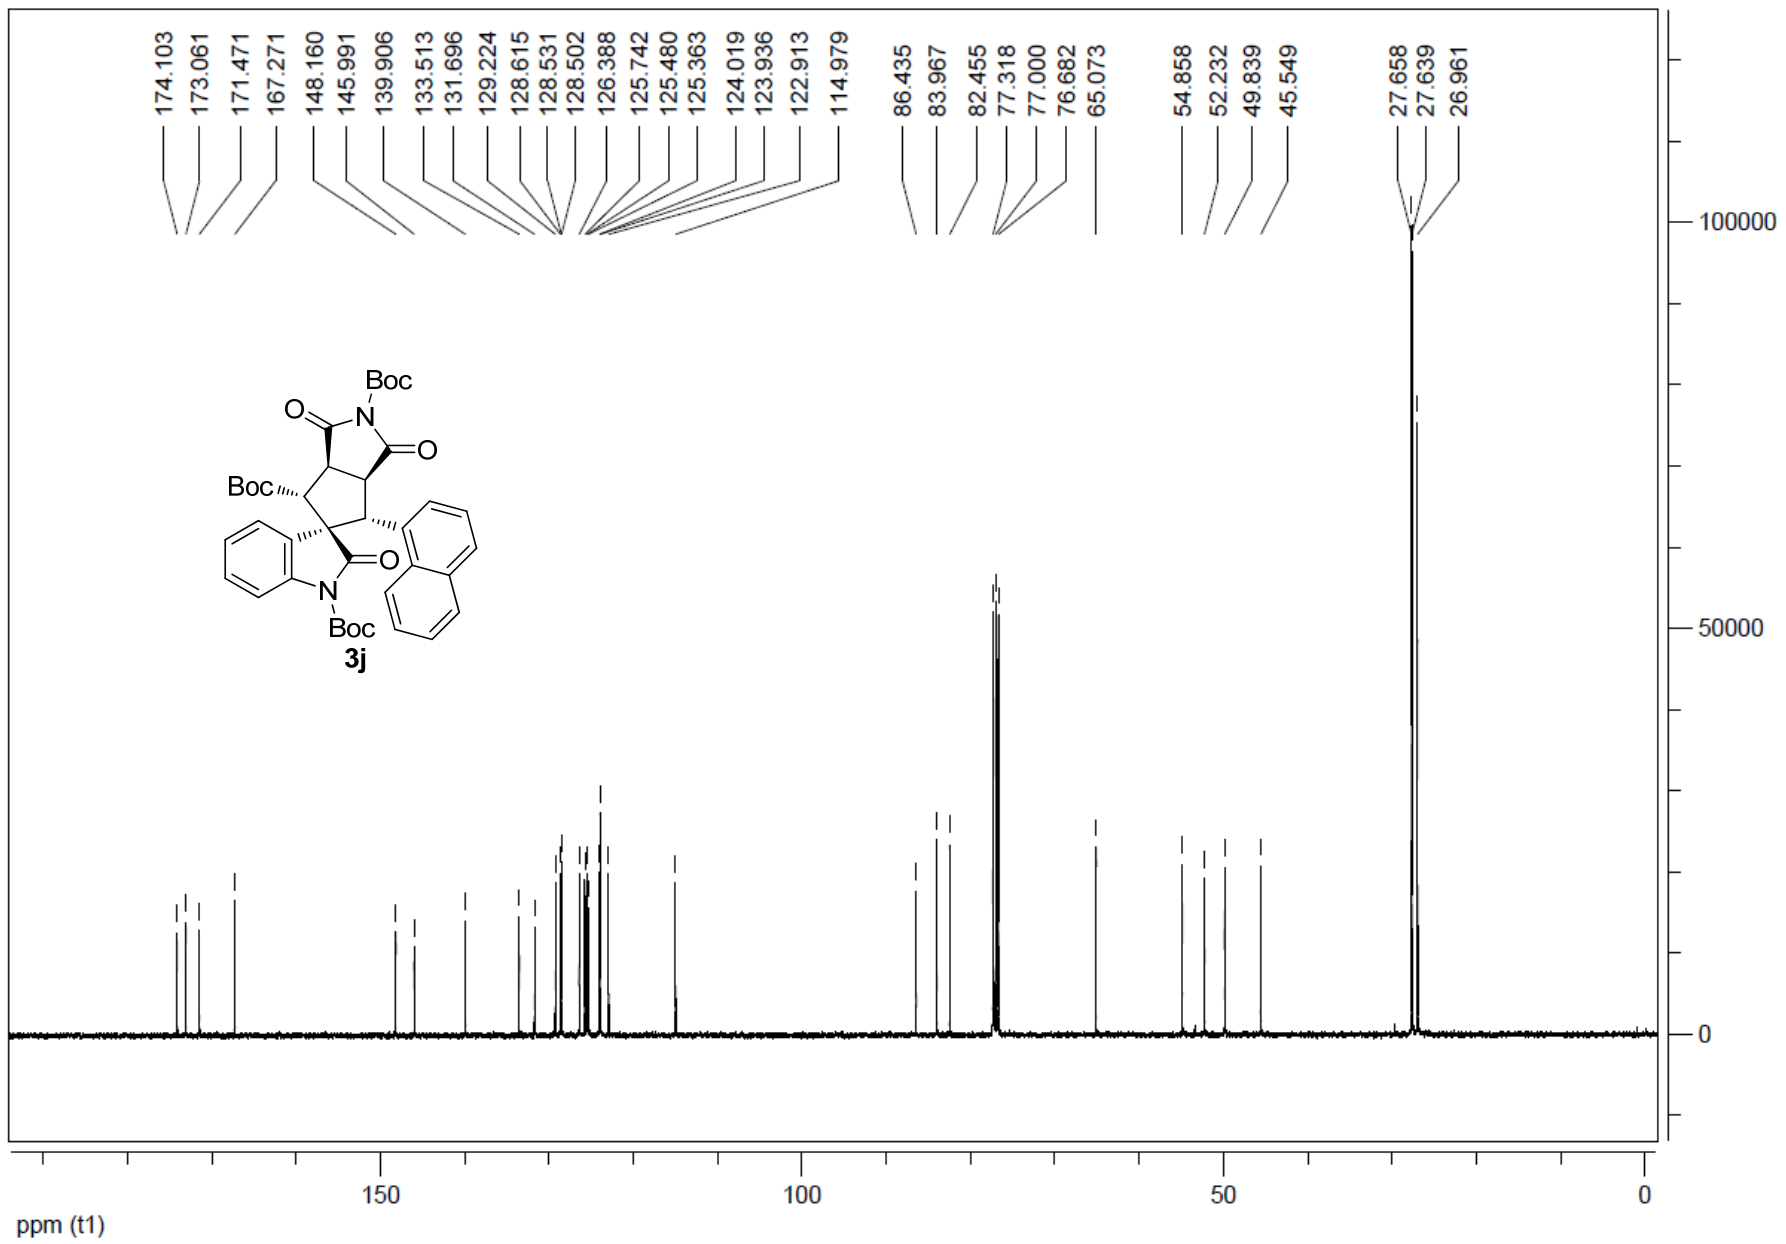



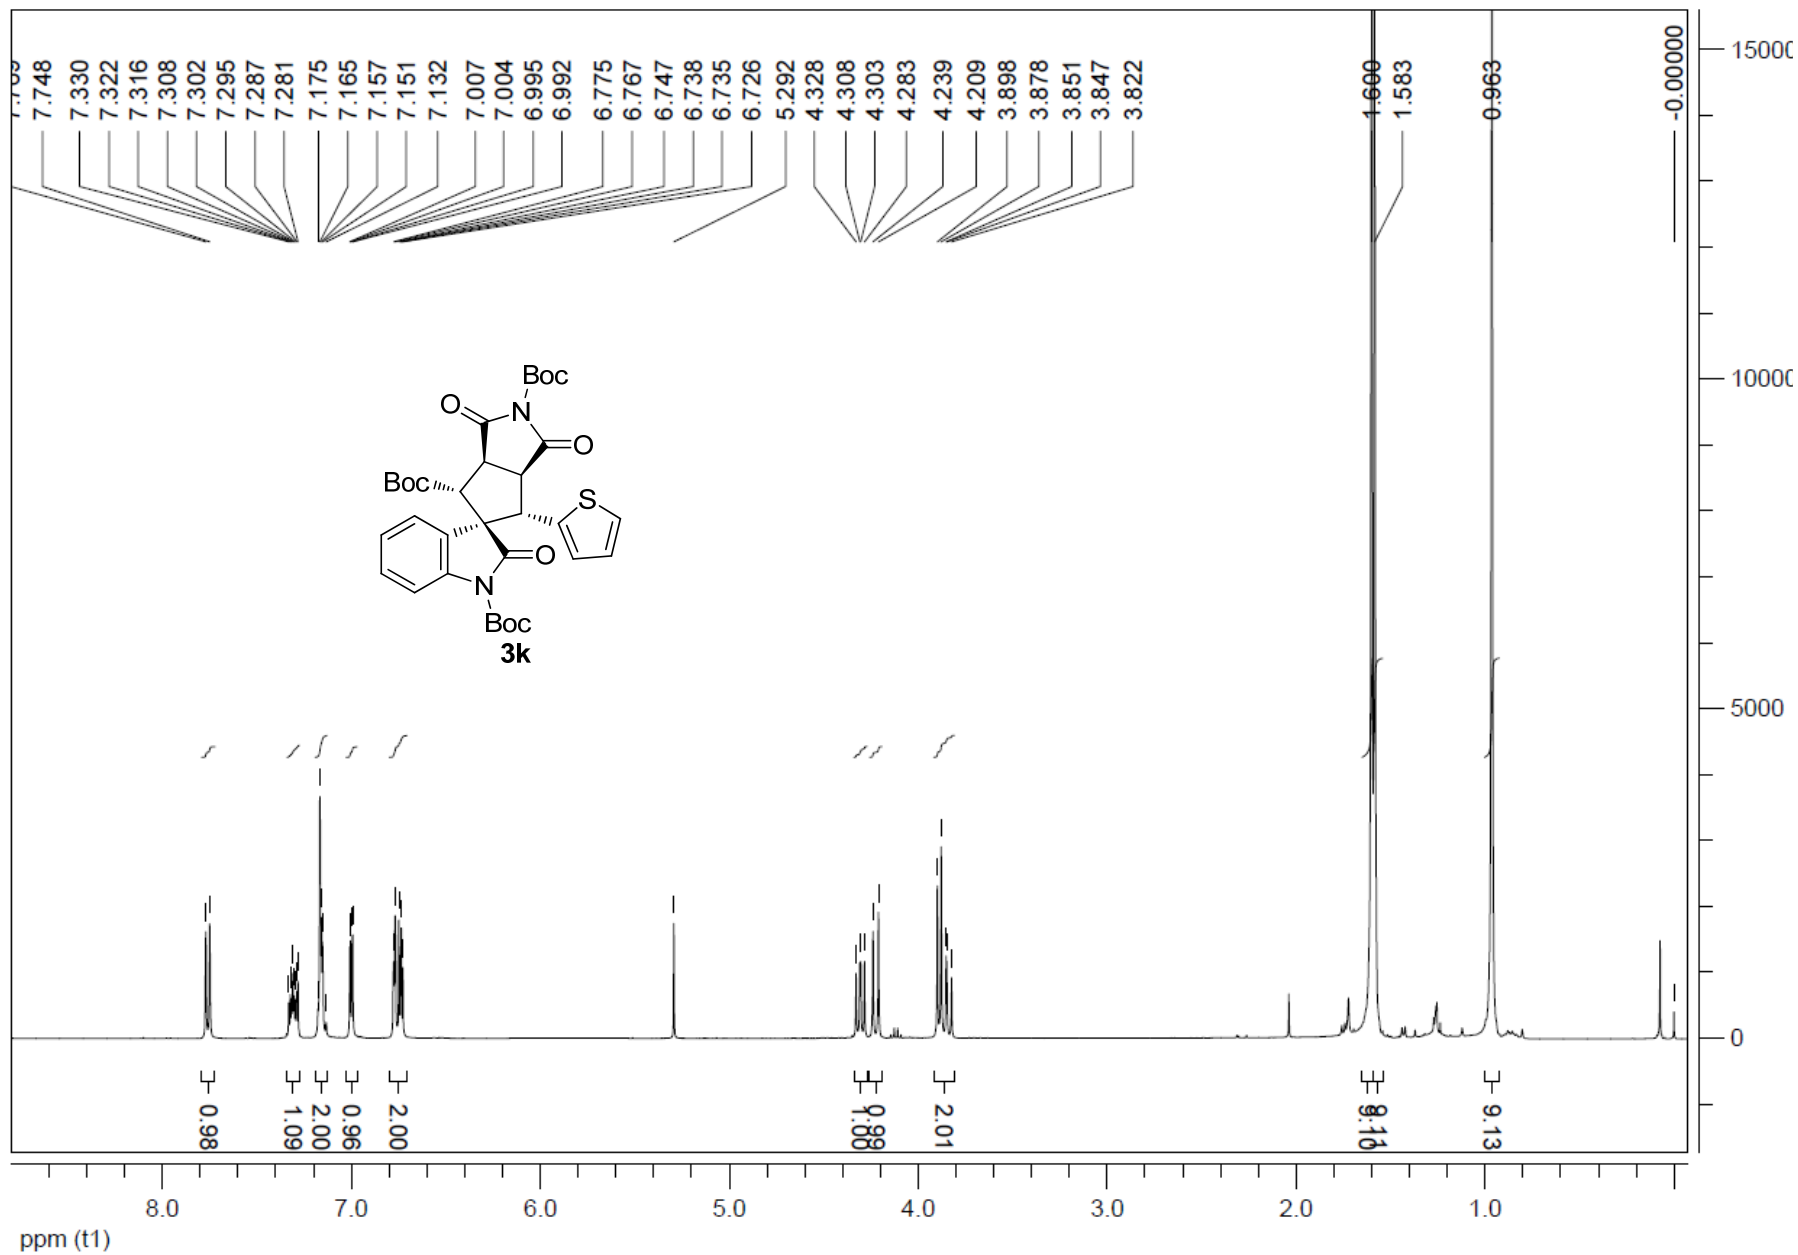

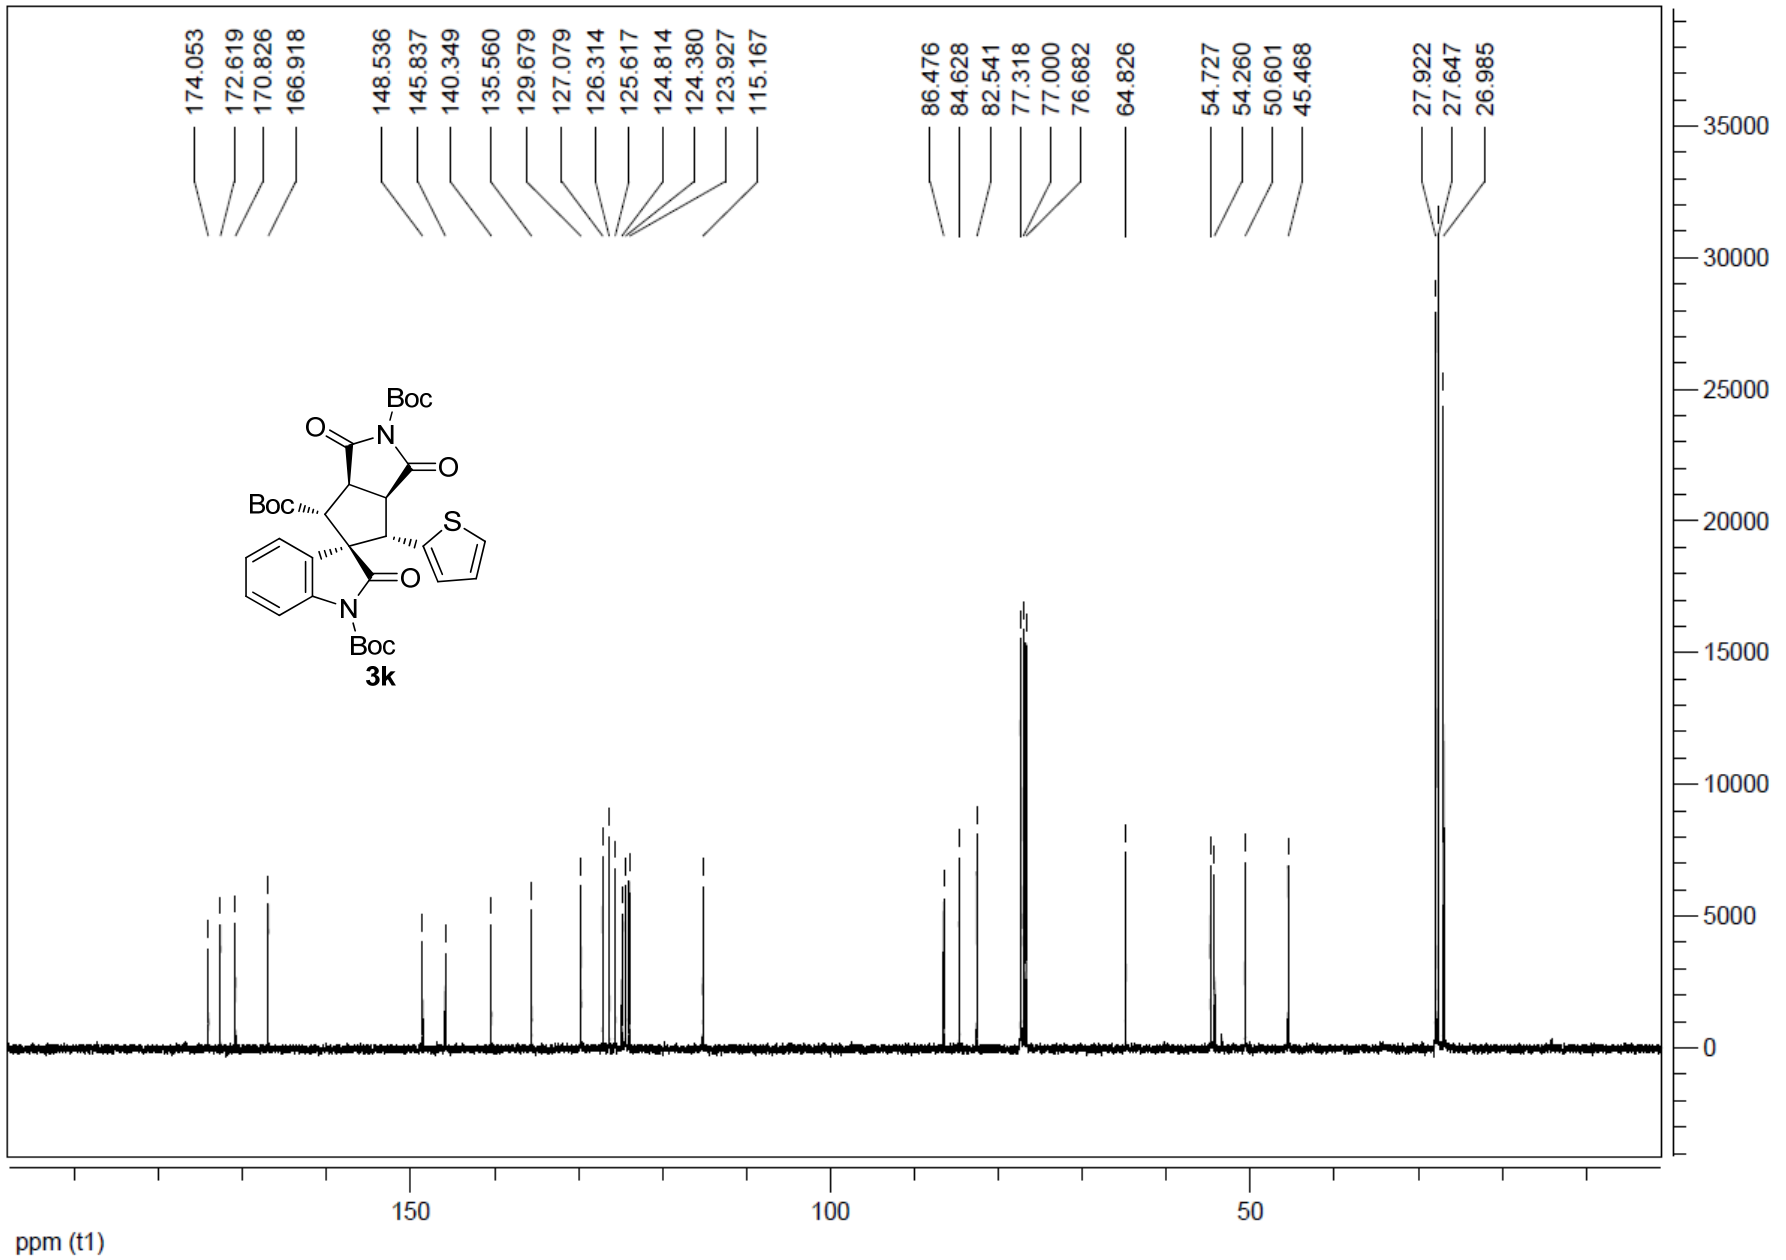



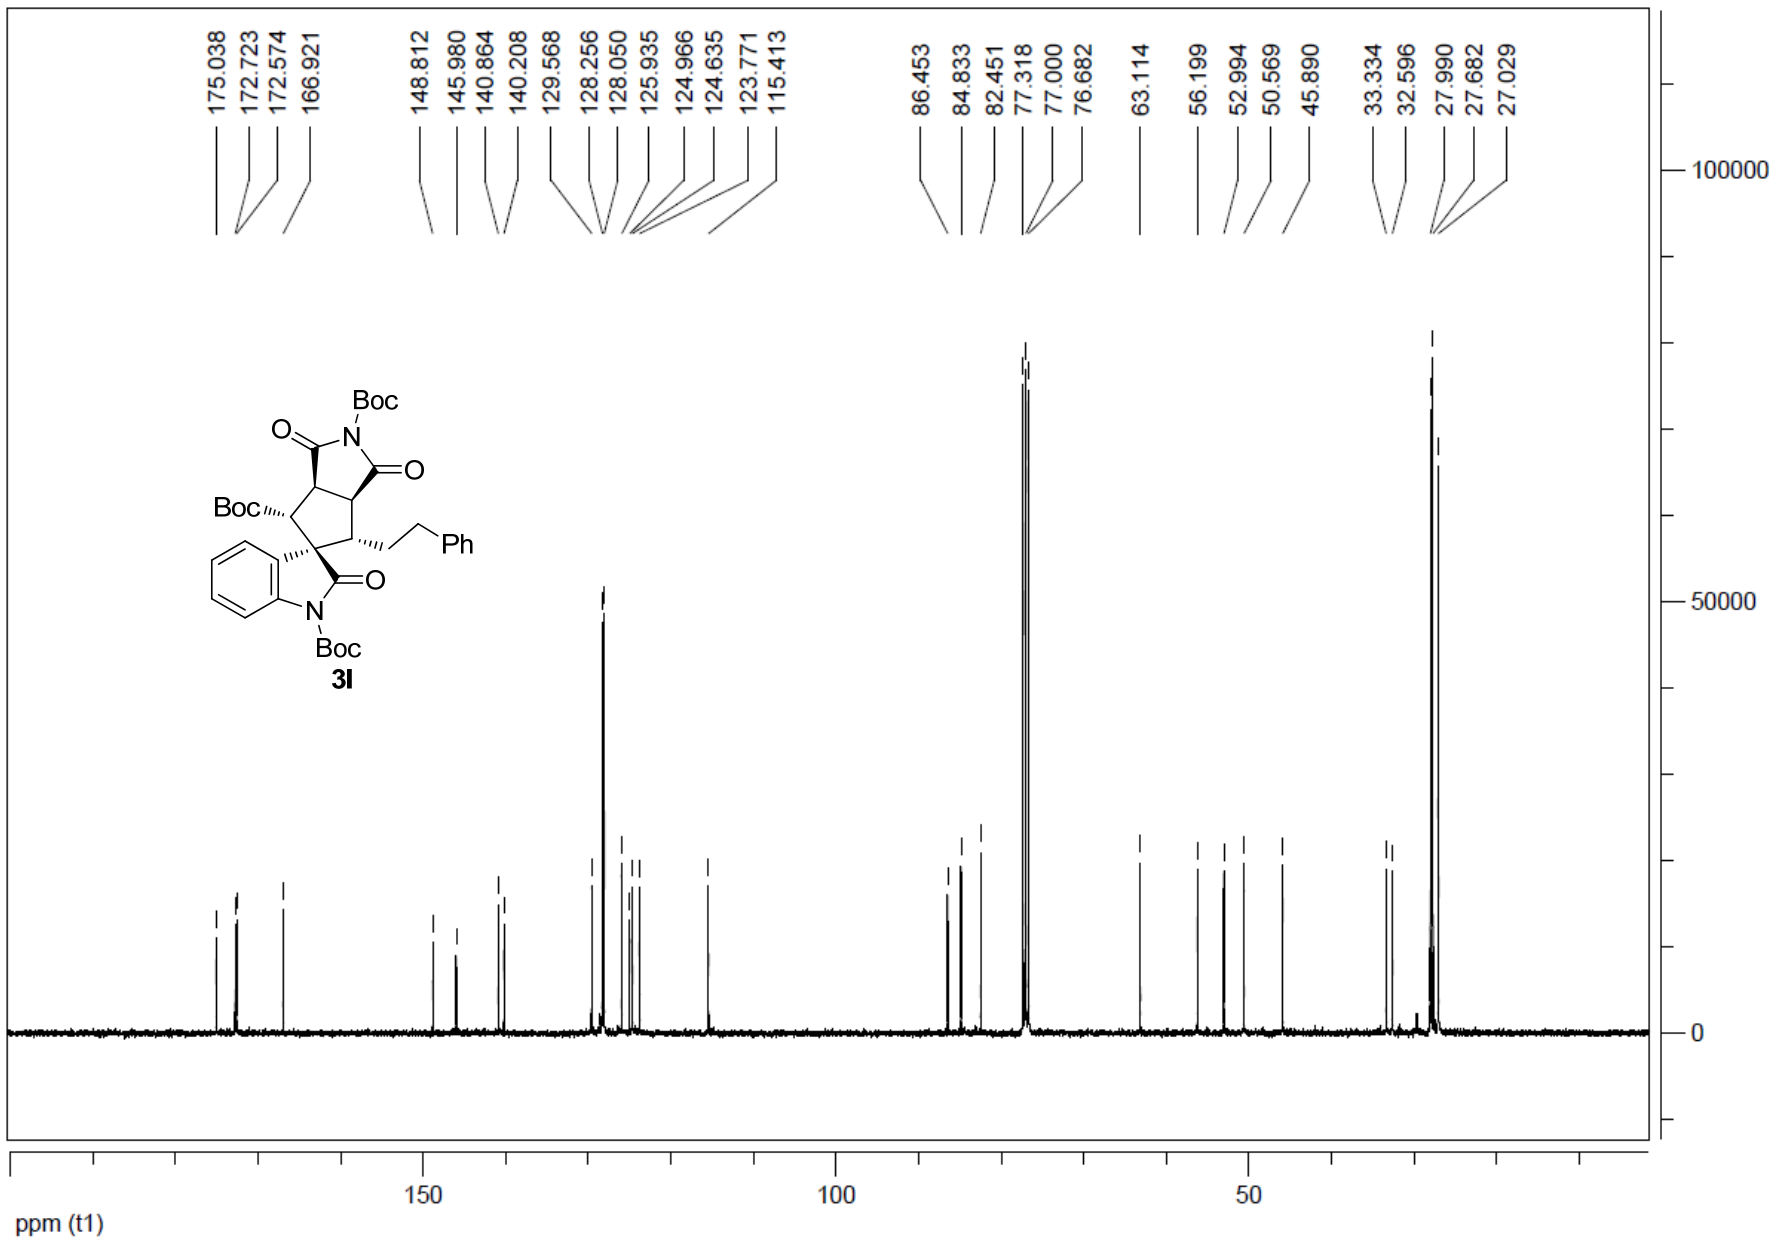

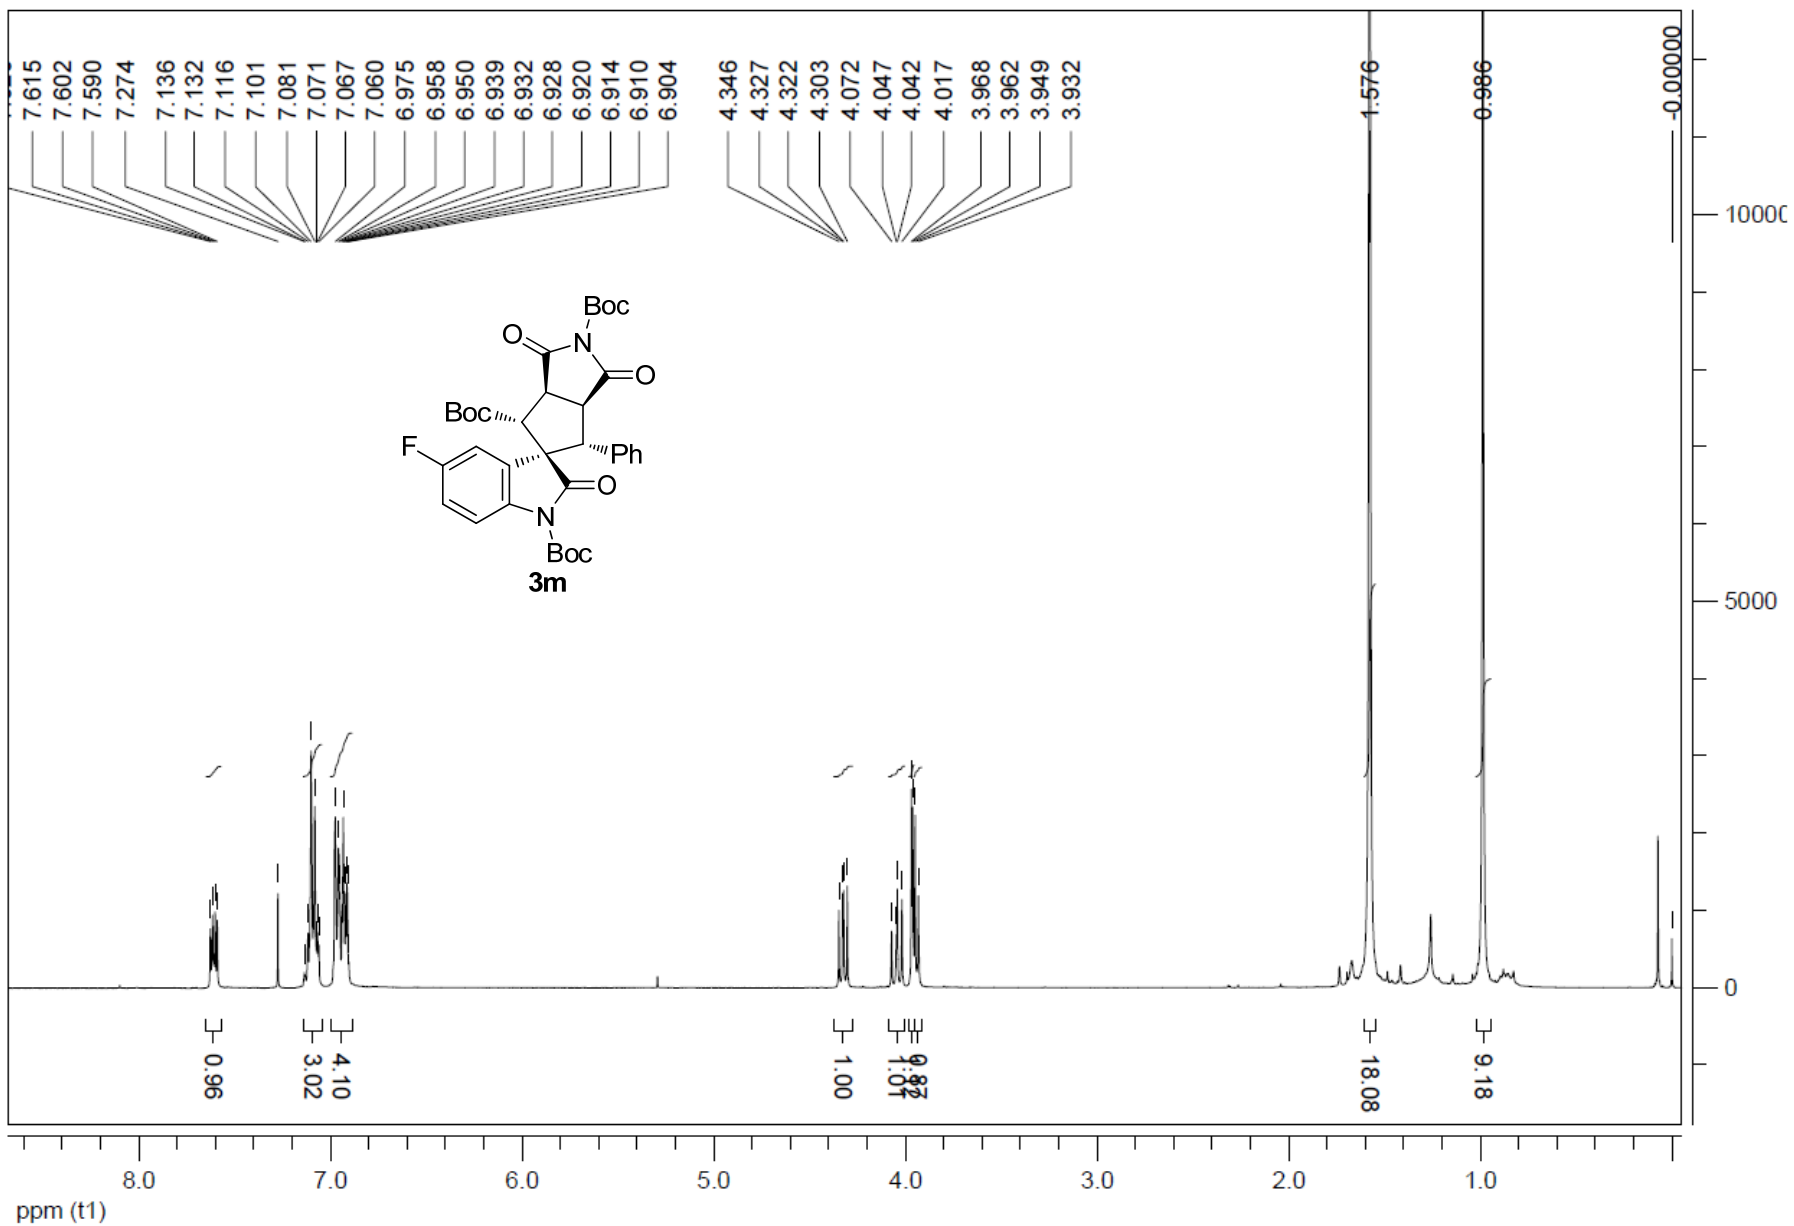

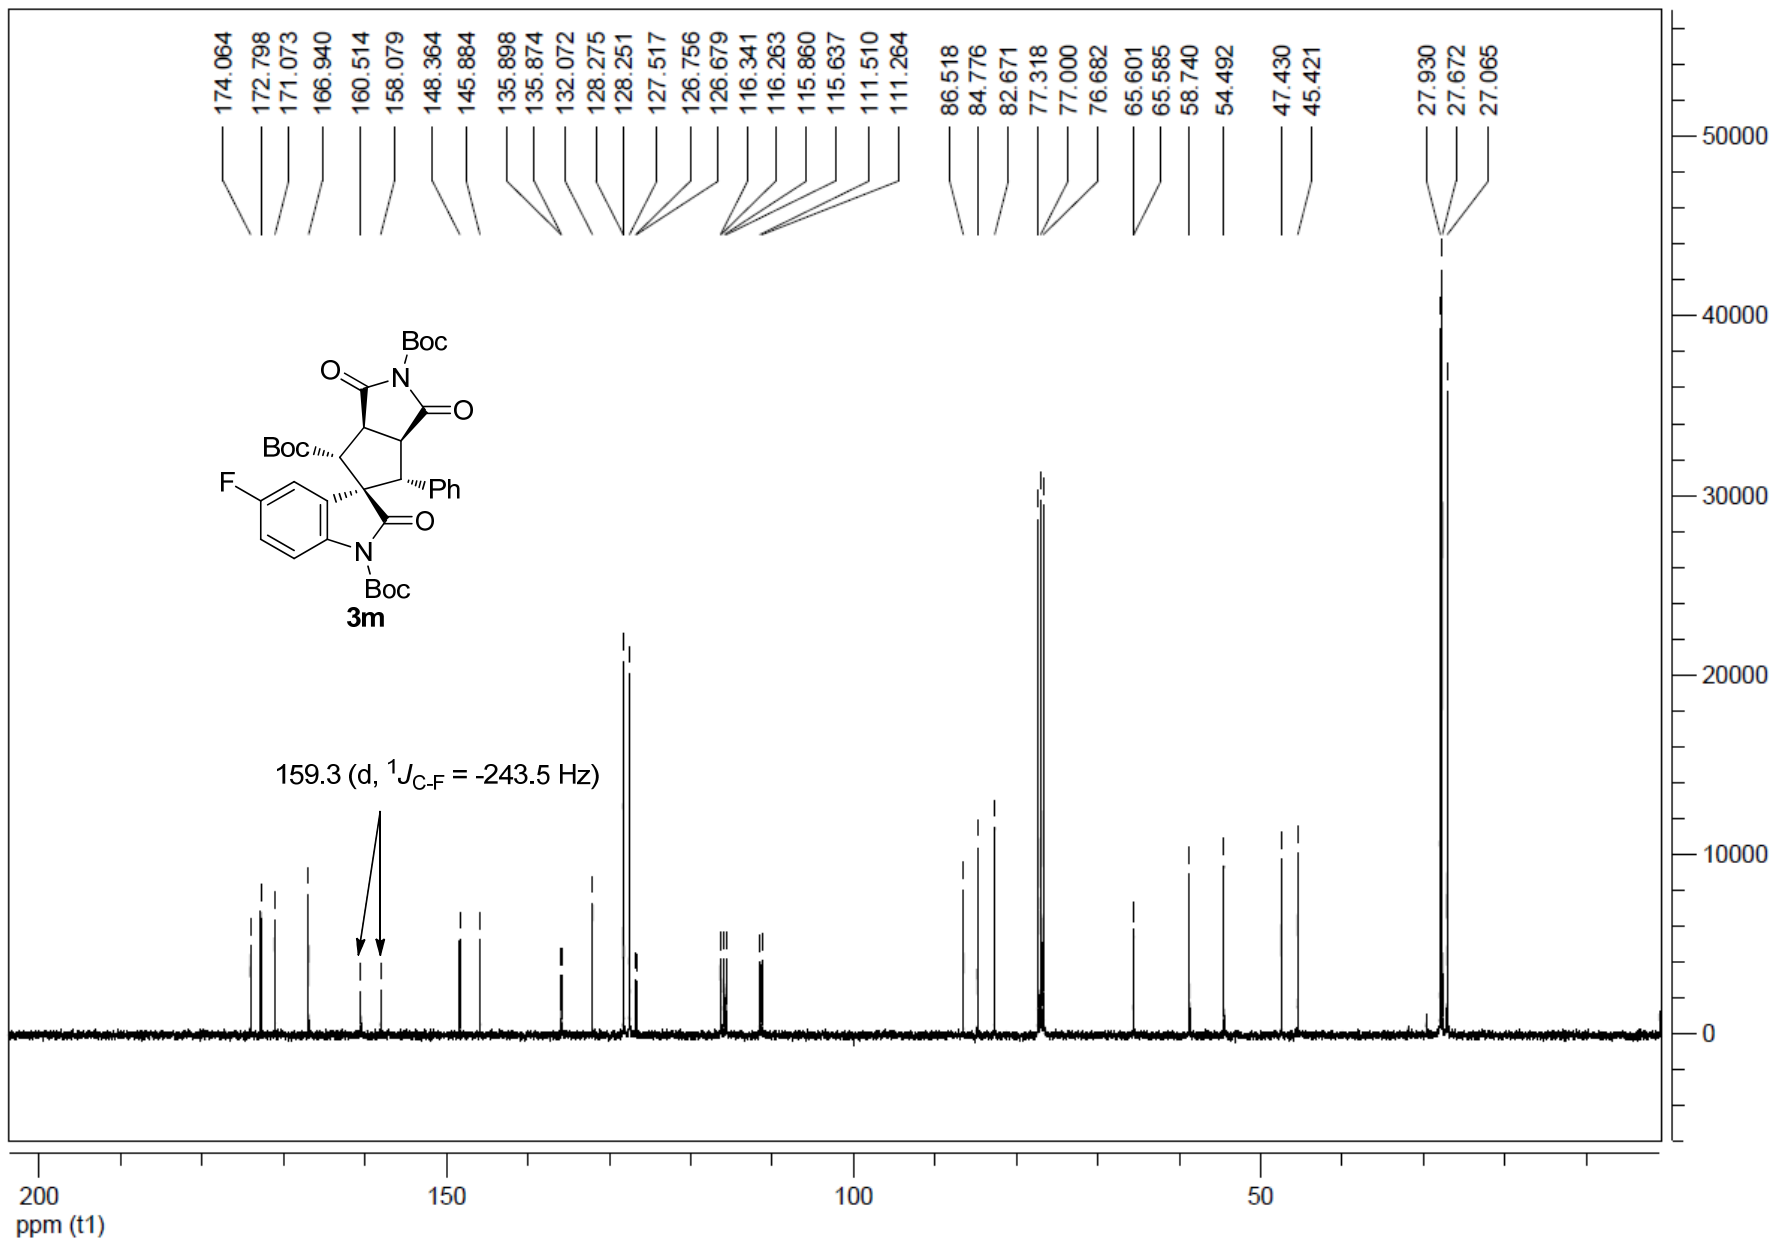

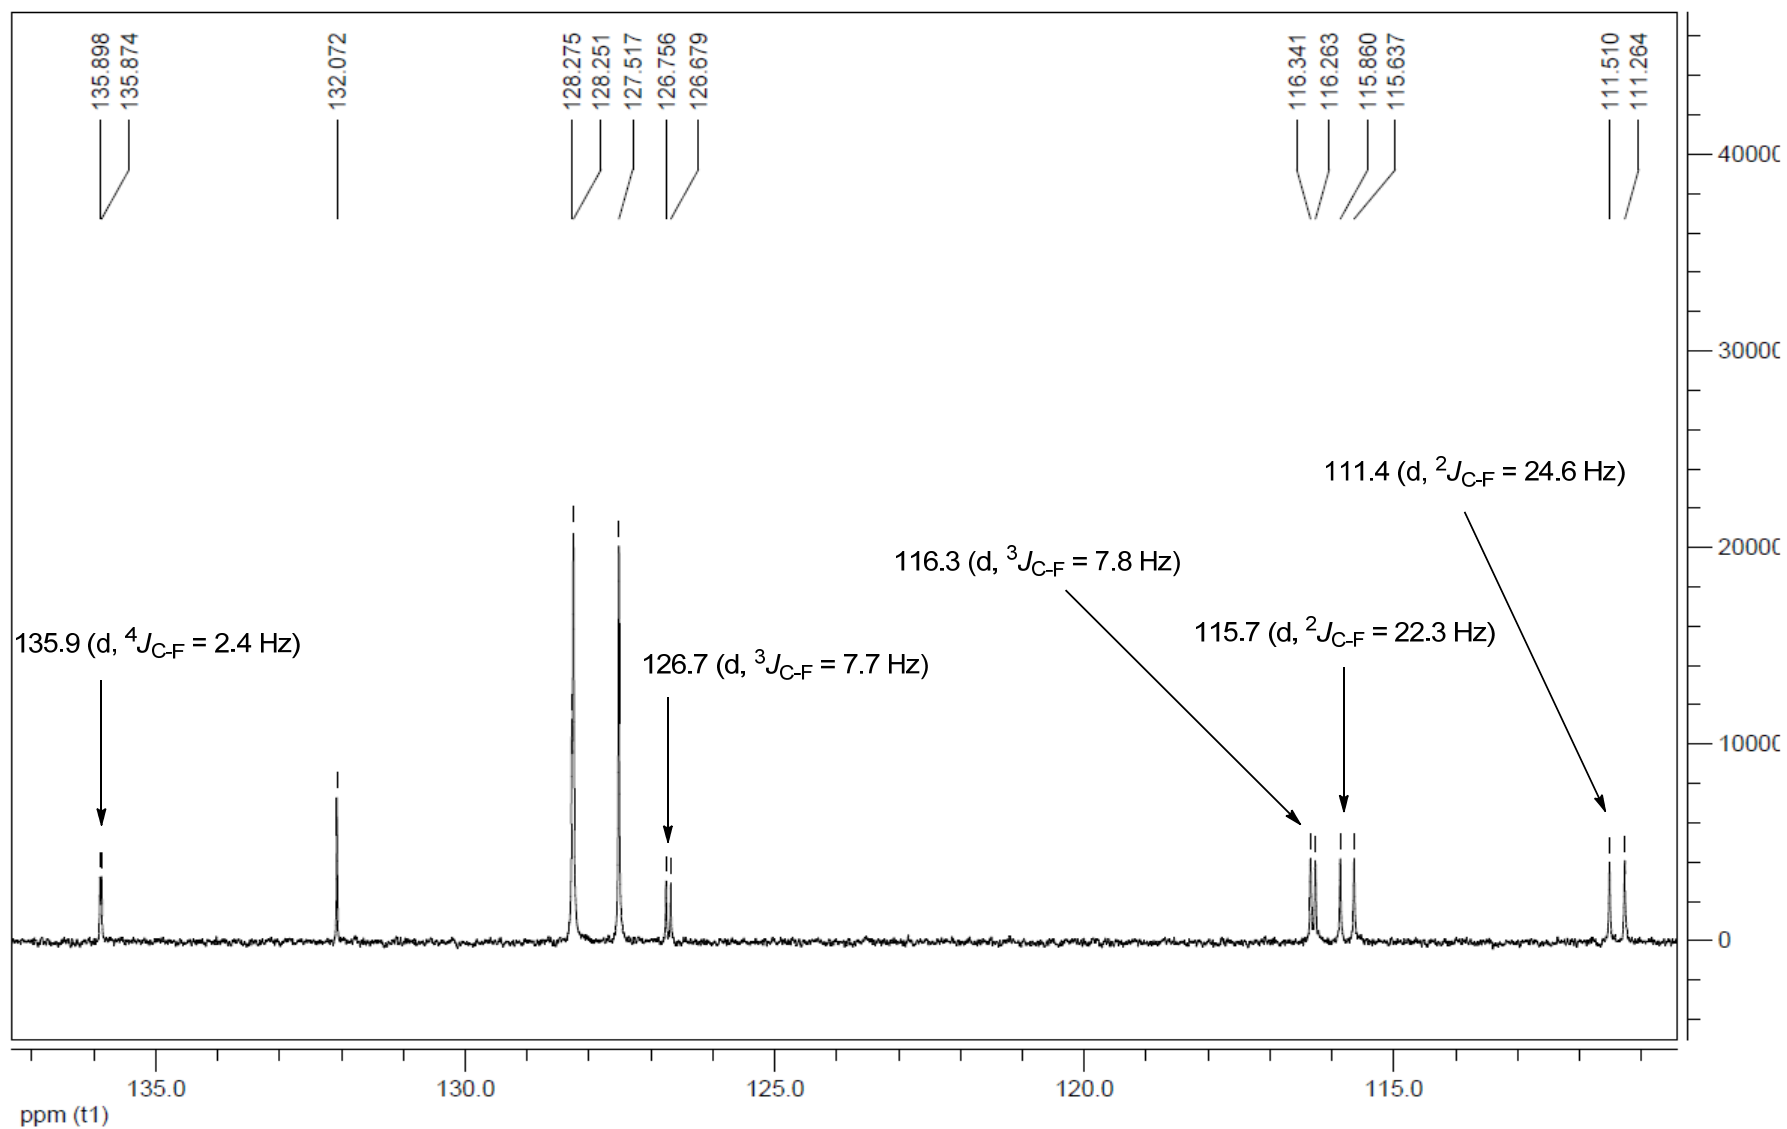

Partial enlargement of  $^{13}\text{C}$  NMR of **3m** for clarify the C-F coupling.

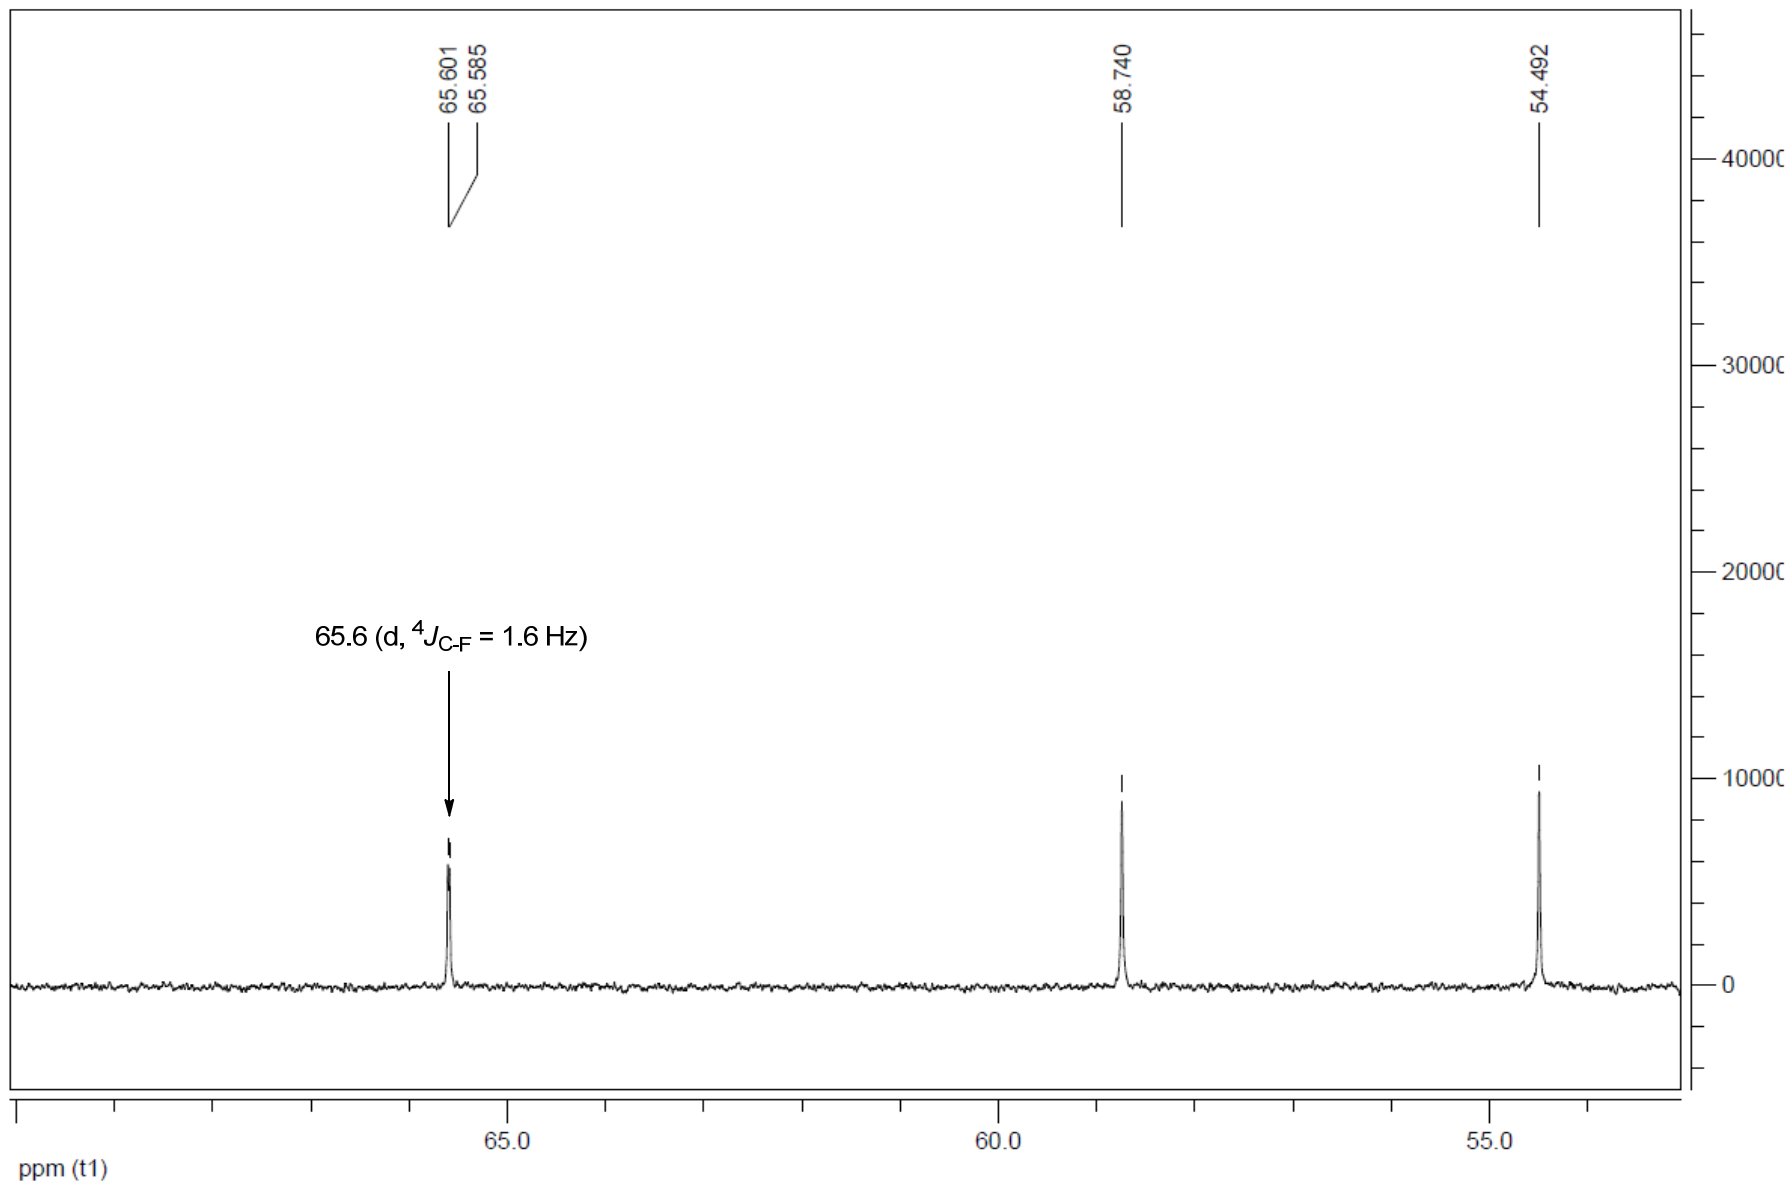

Partial enlargement of  $^{13}\text{C}$  NMR of **3m** for clarify the C-F coupling.





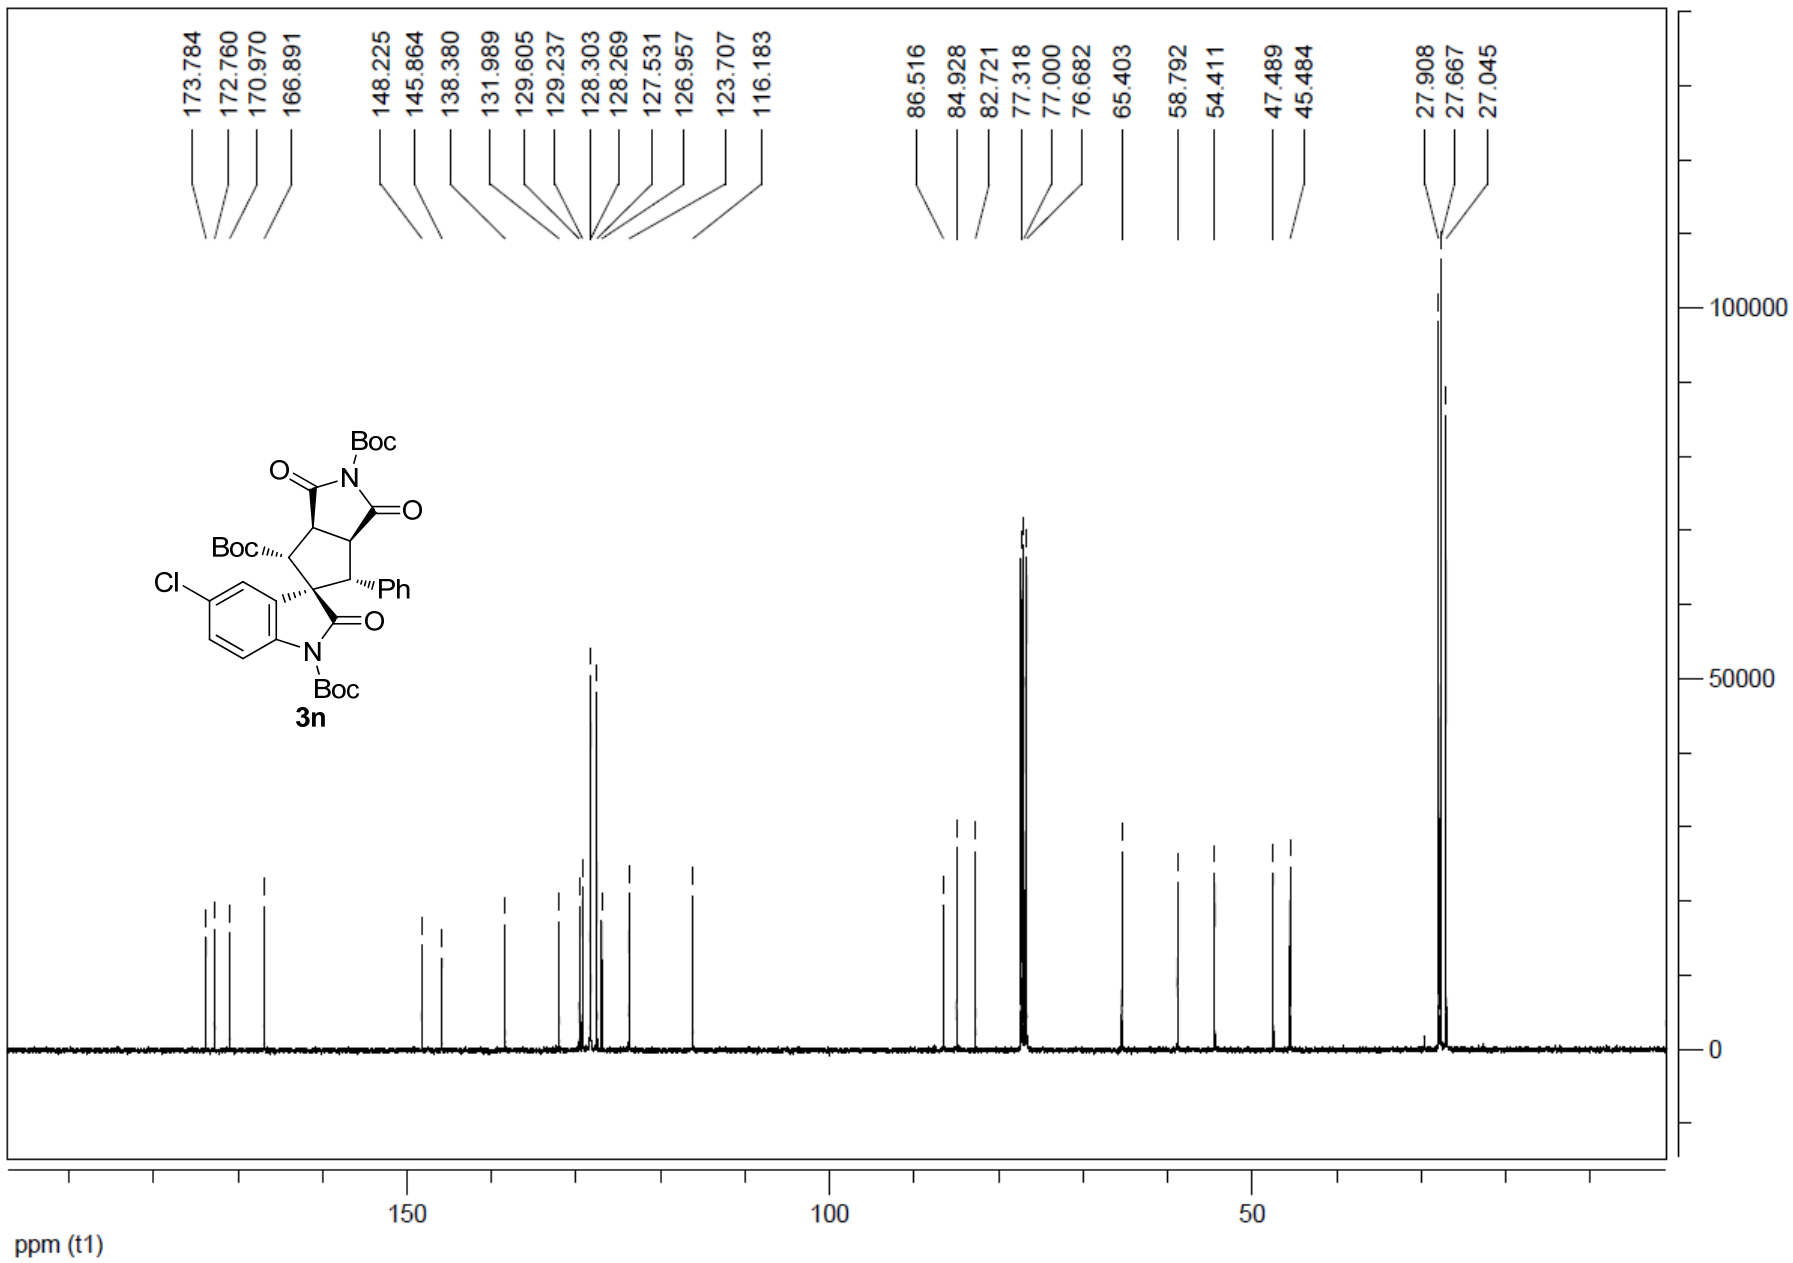

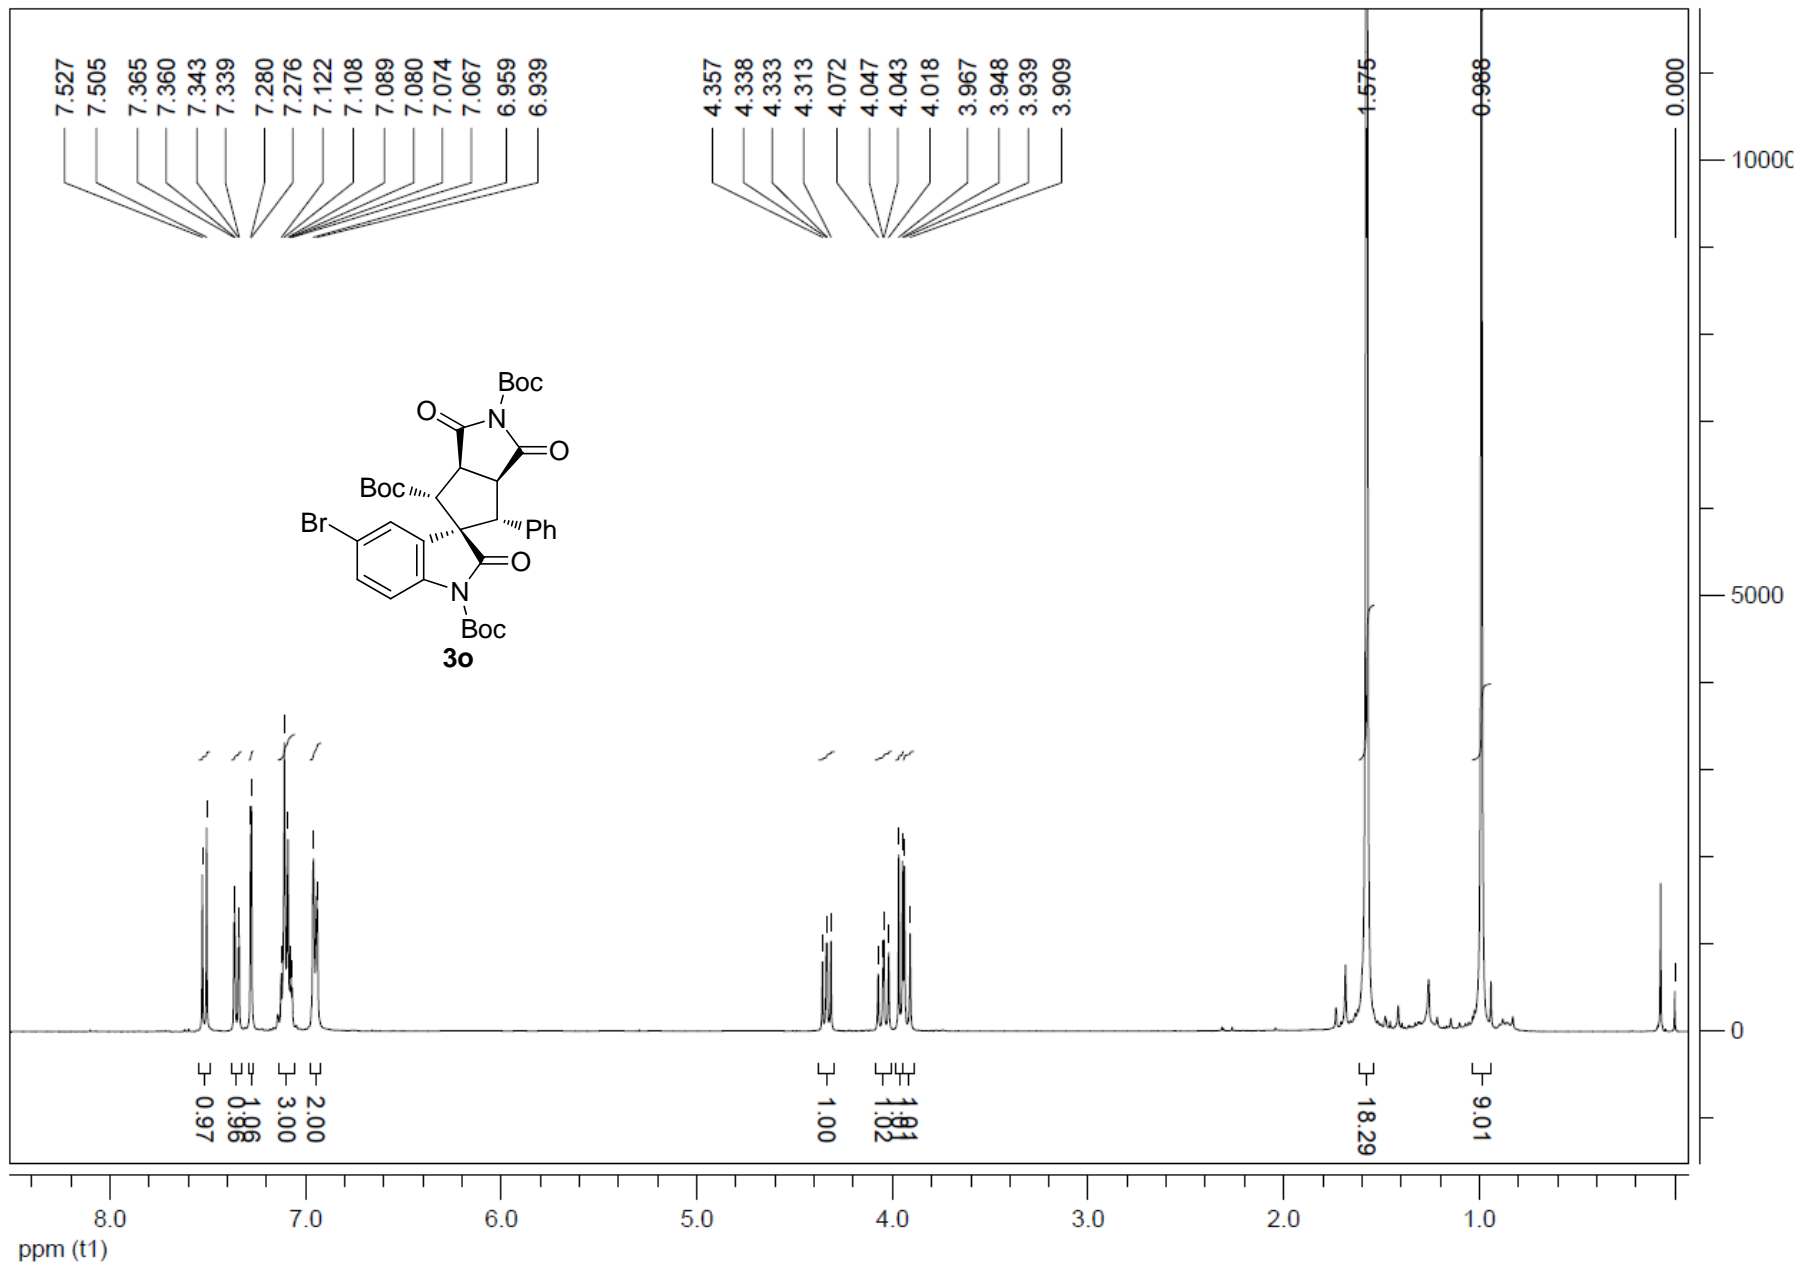

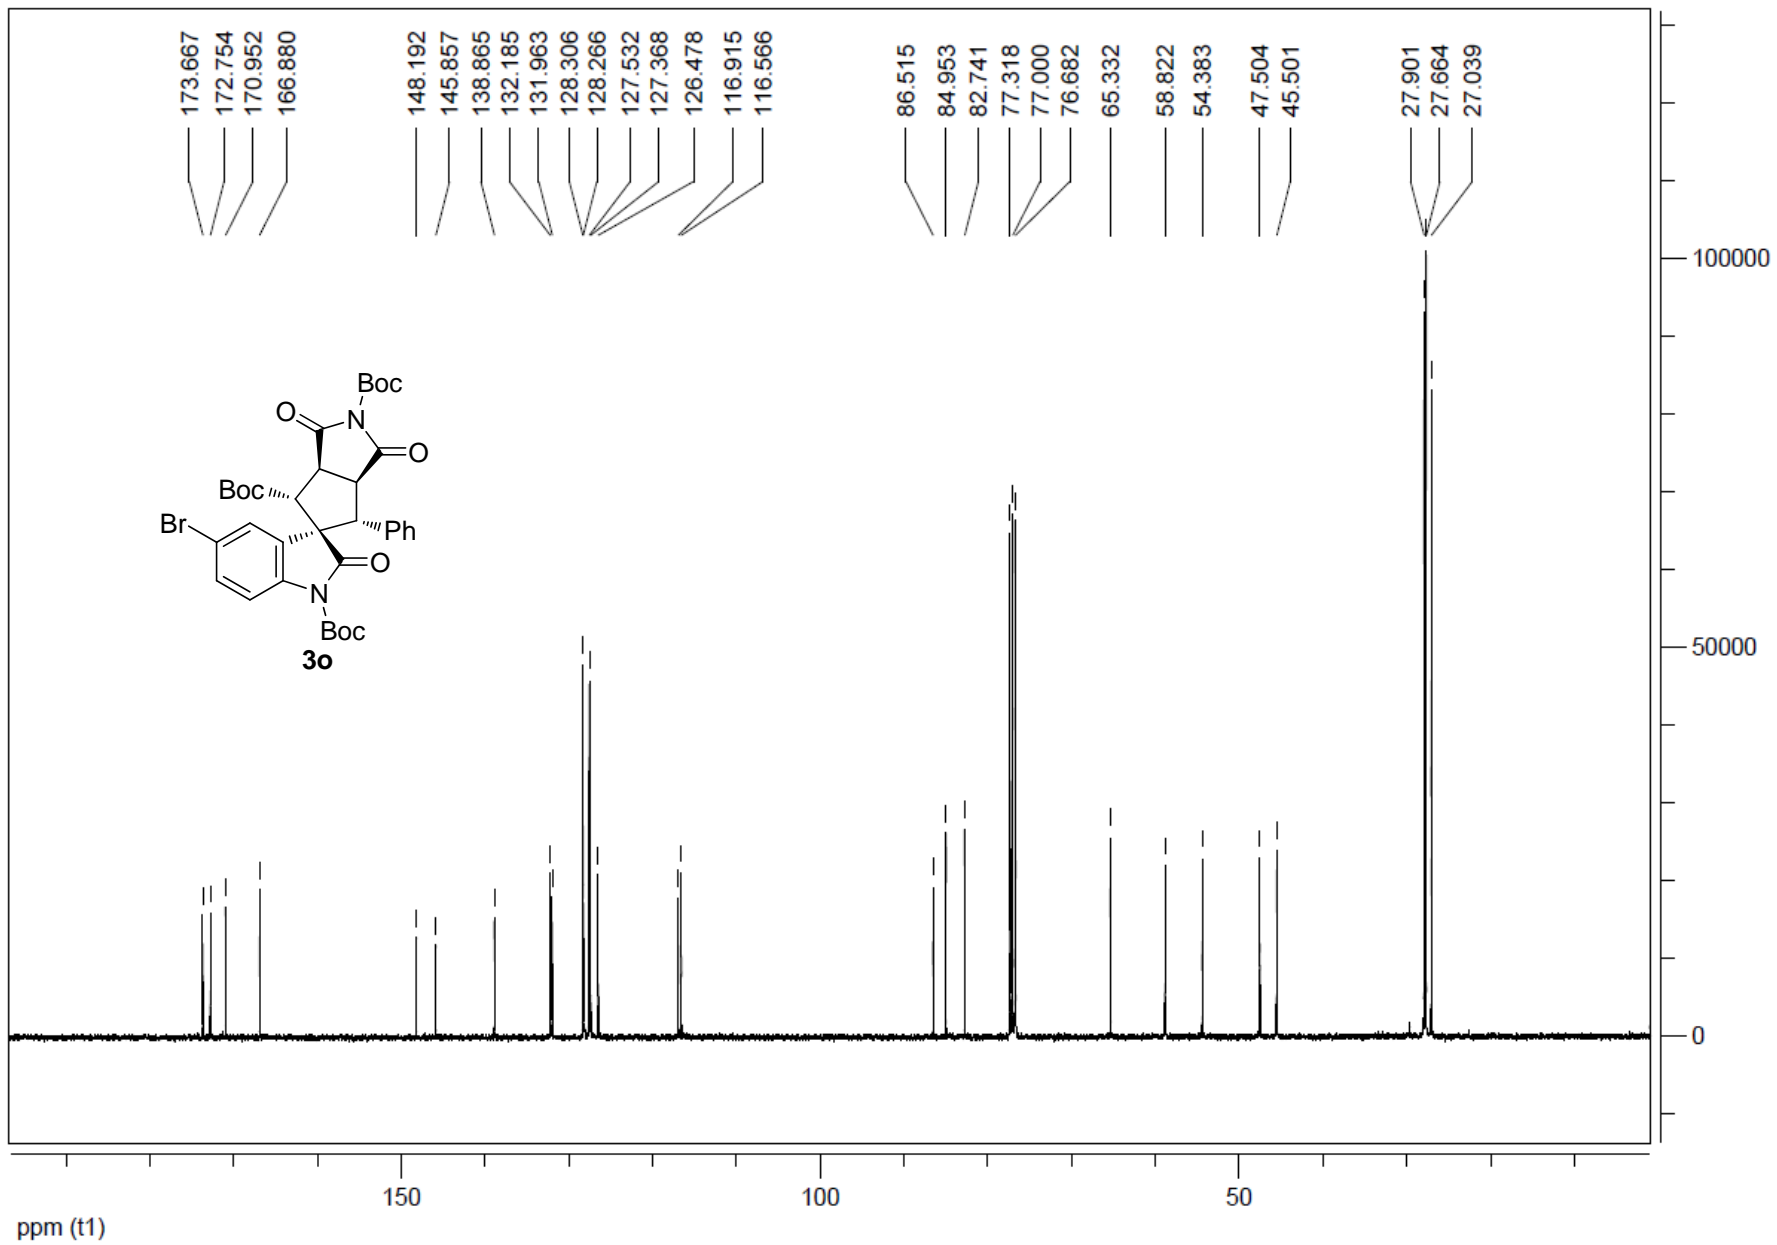

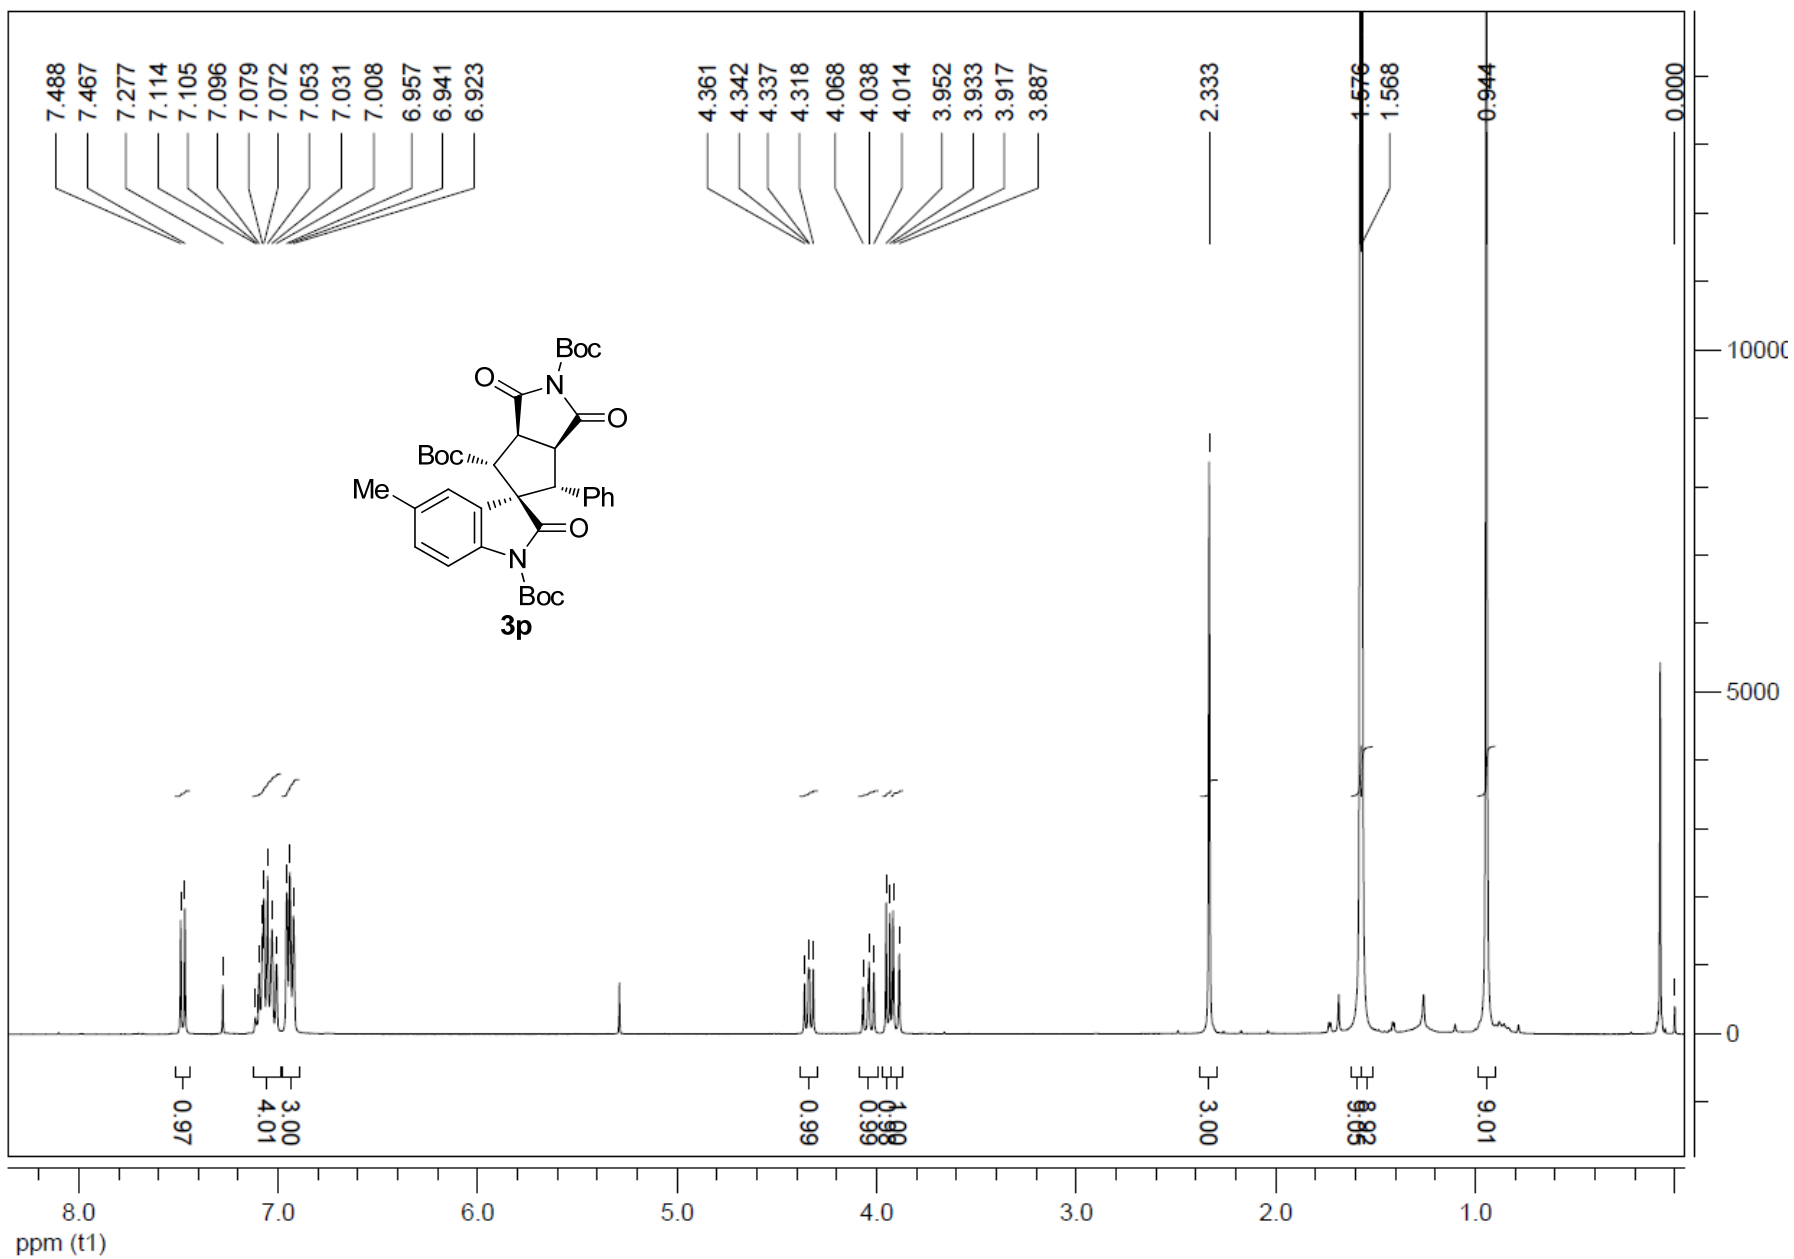

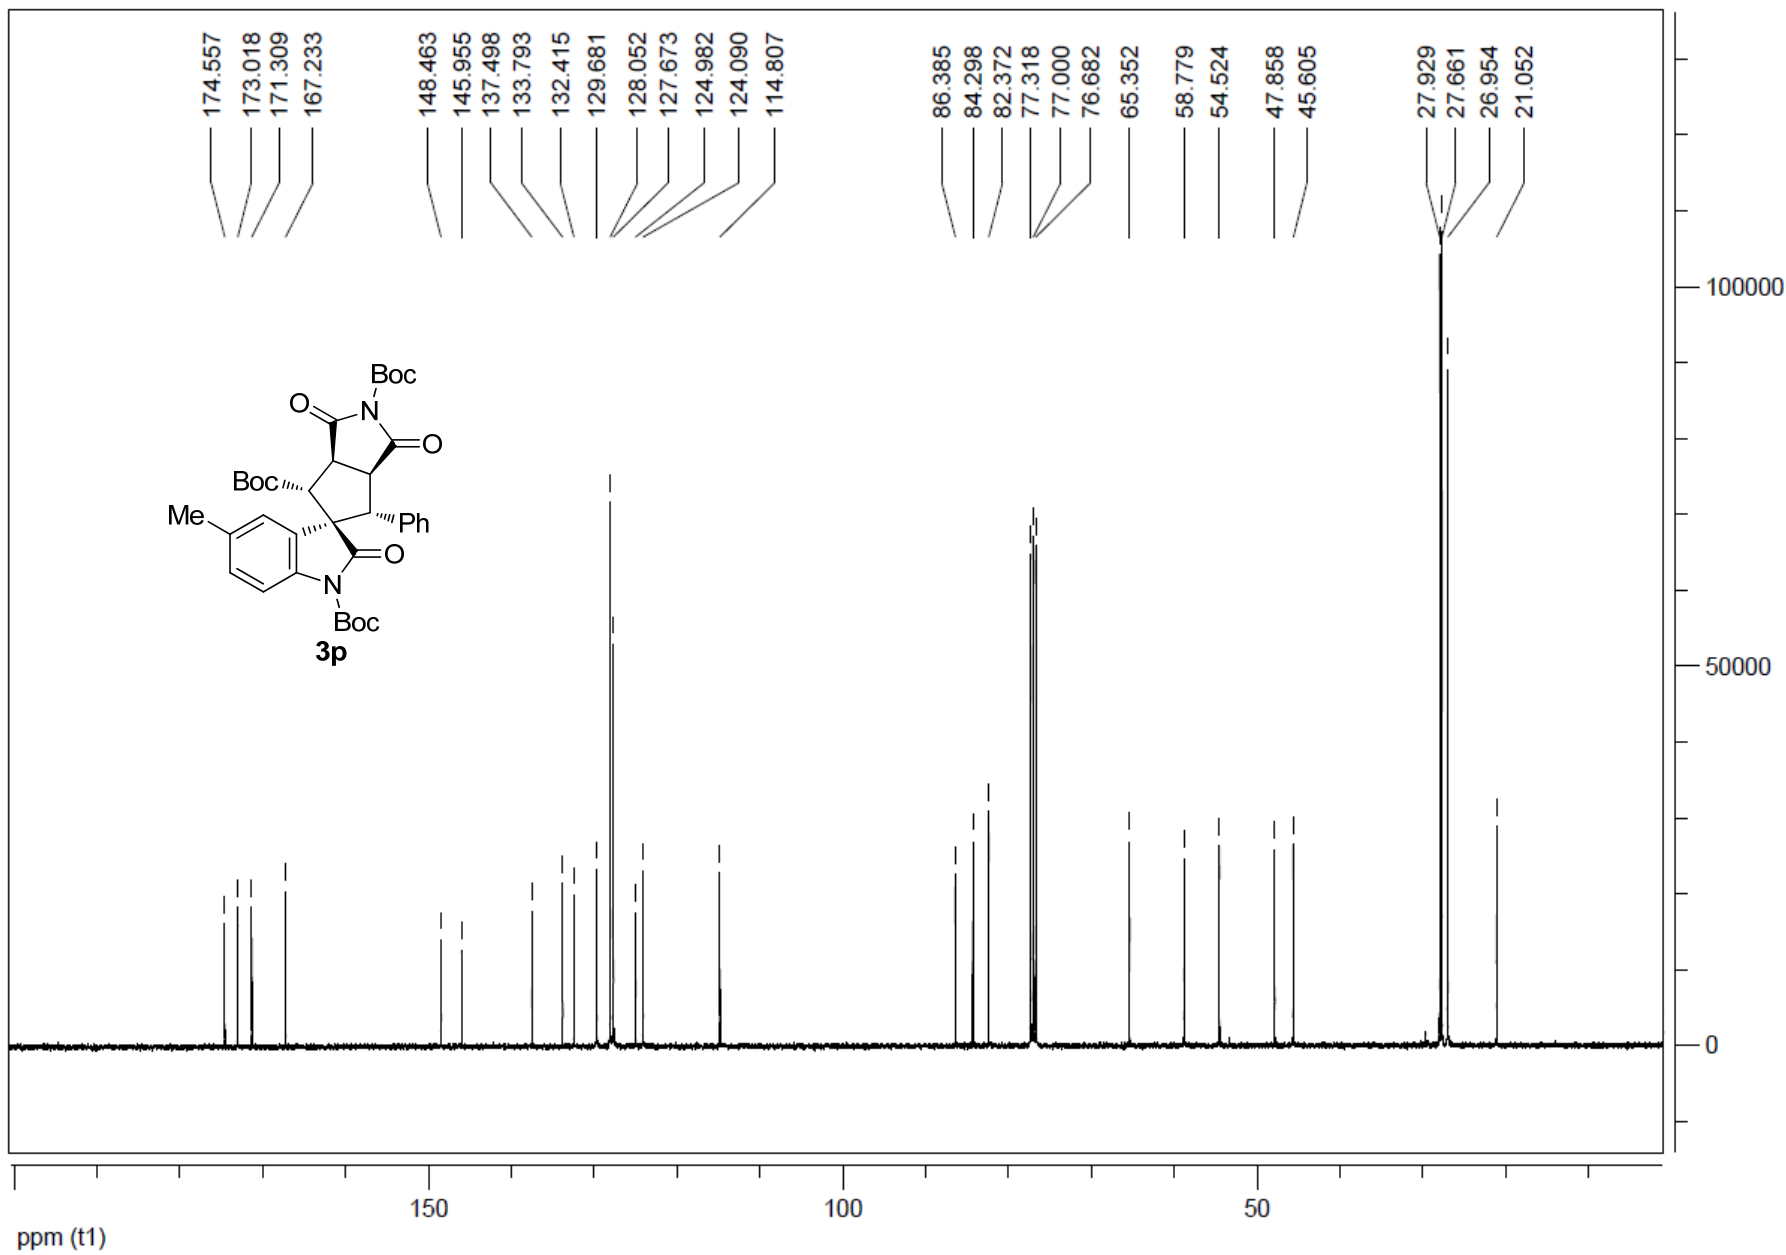

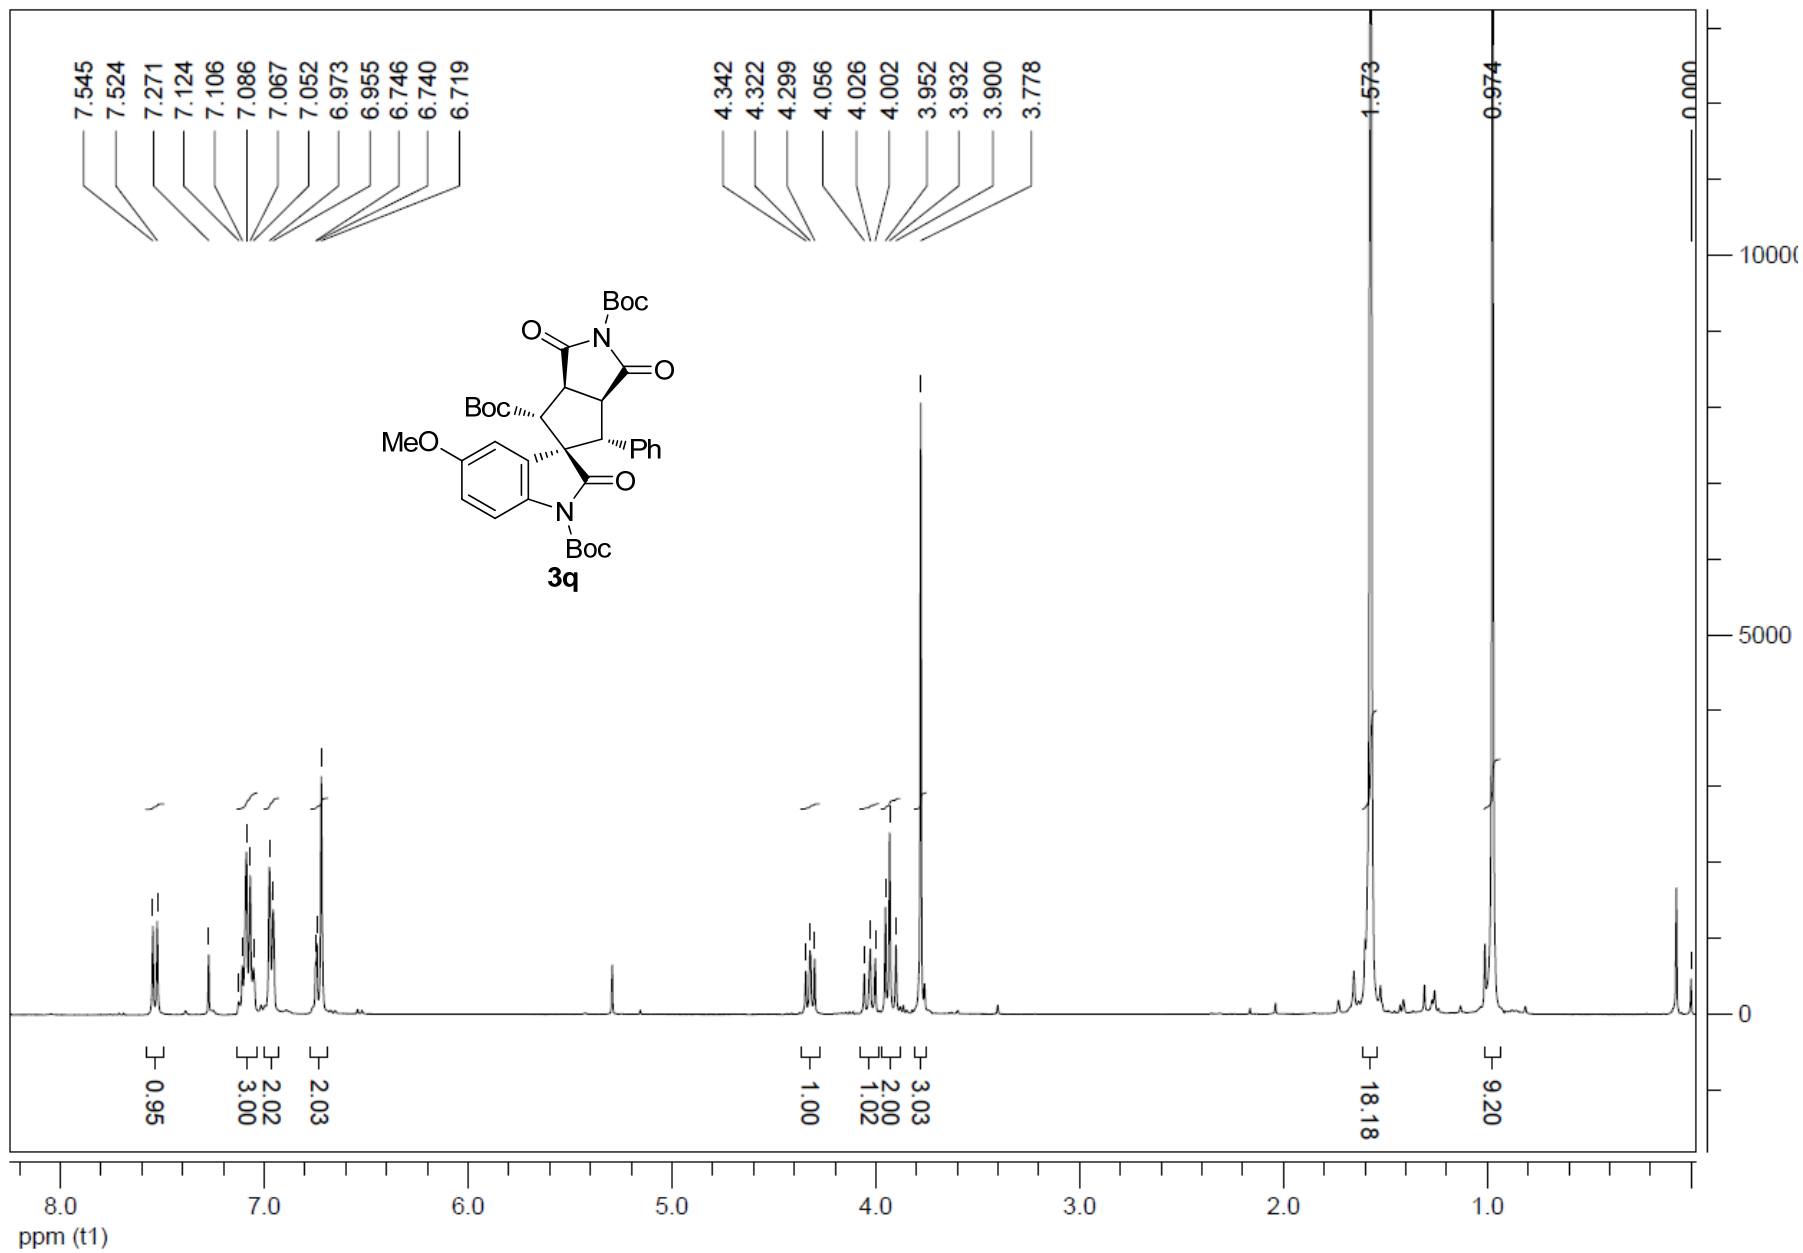

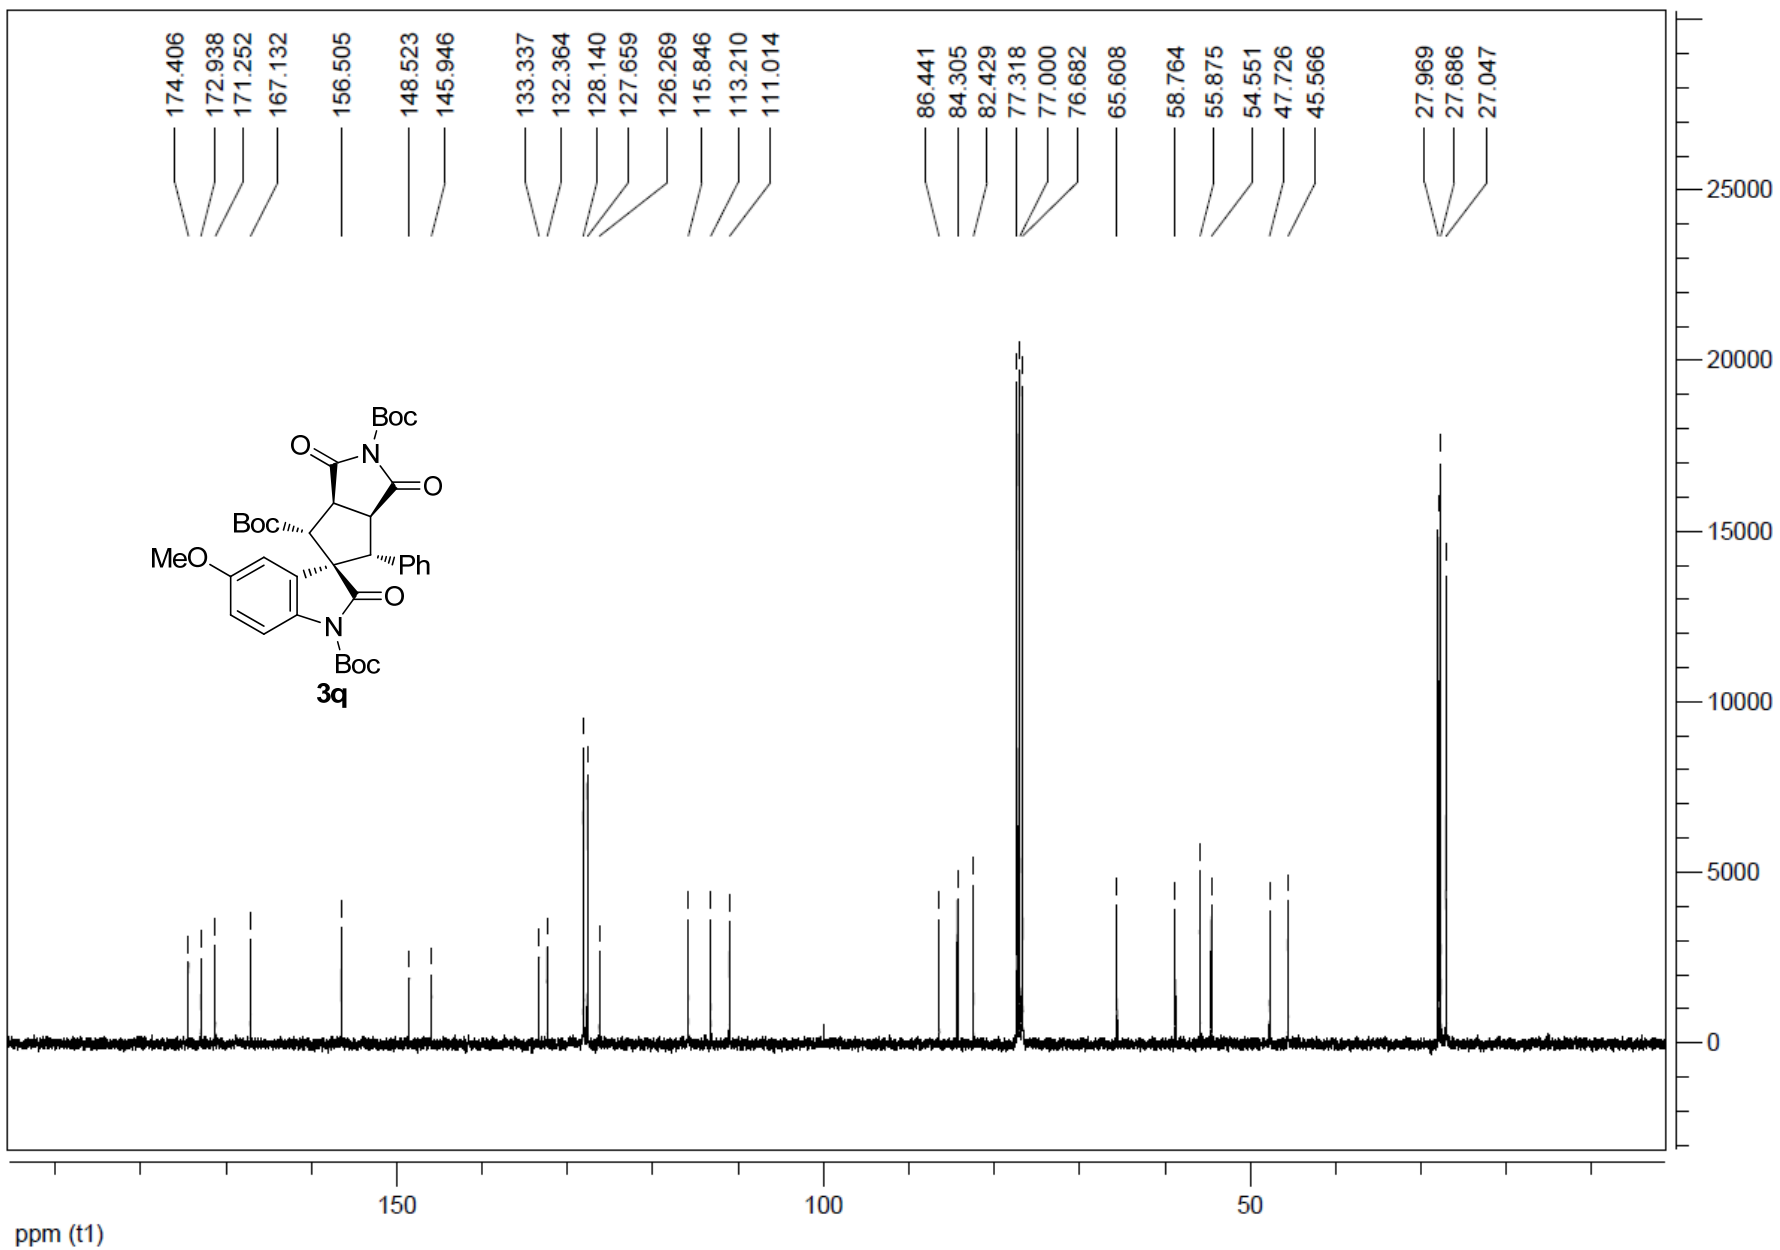



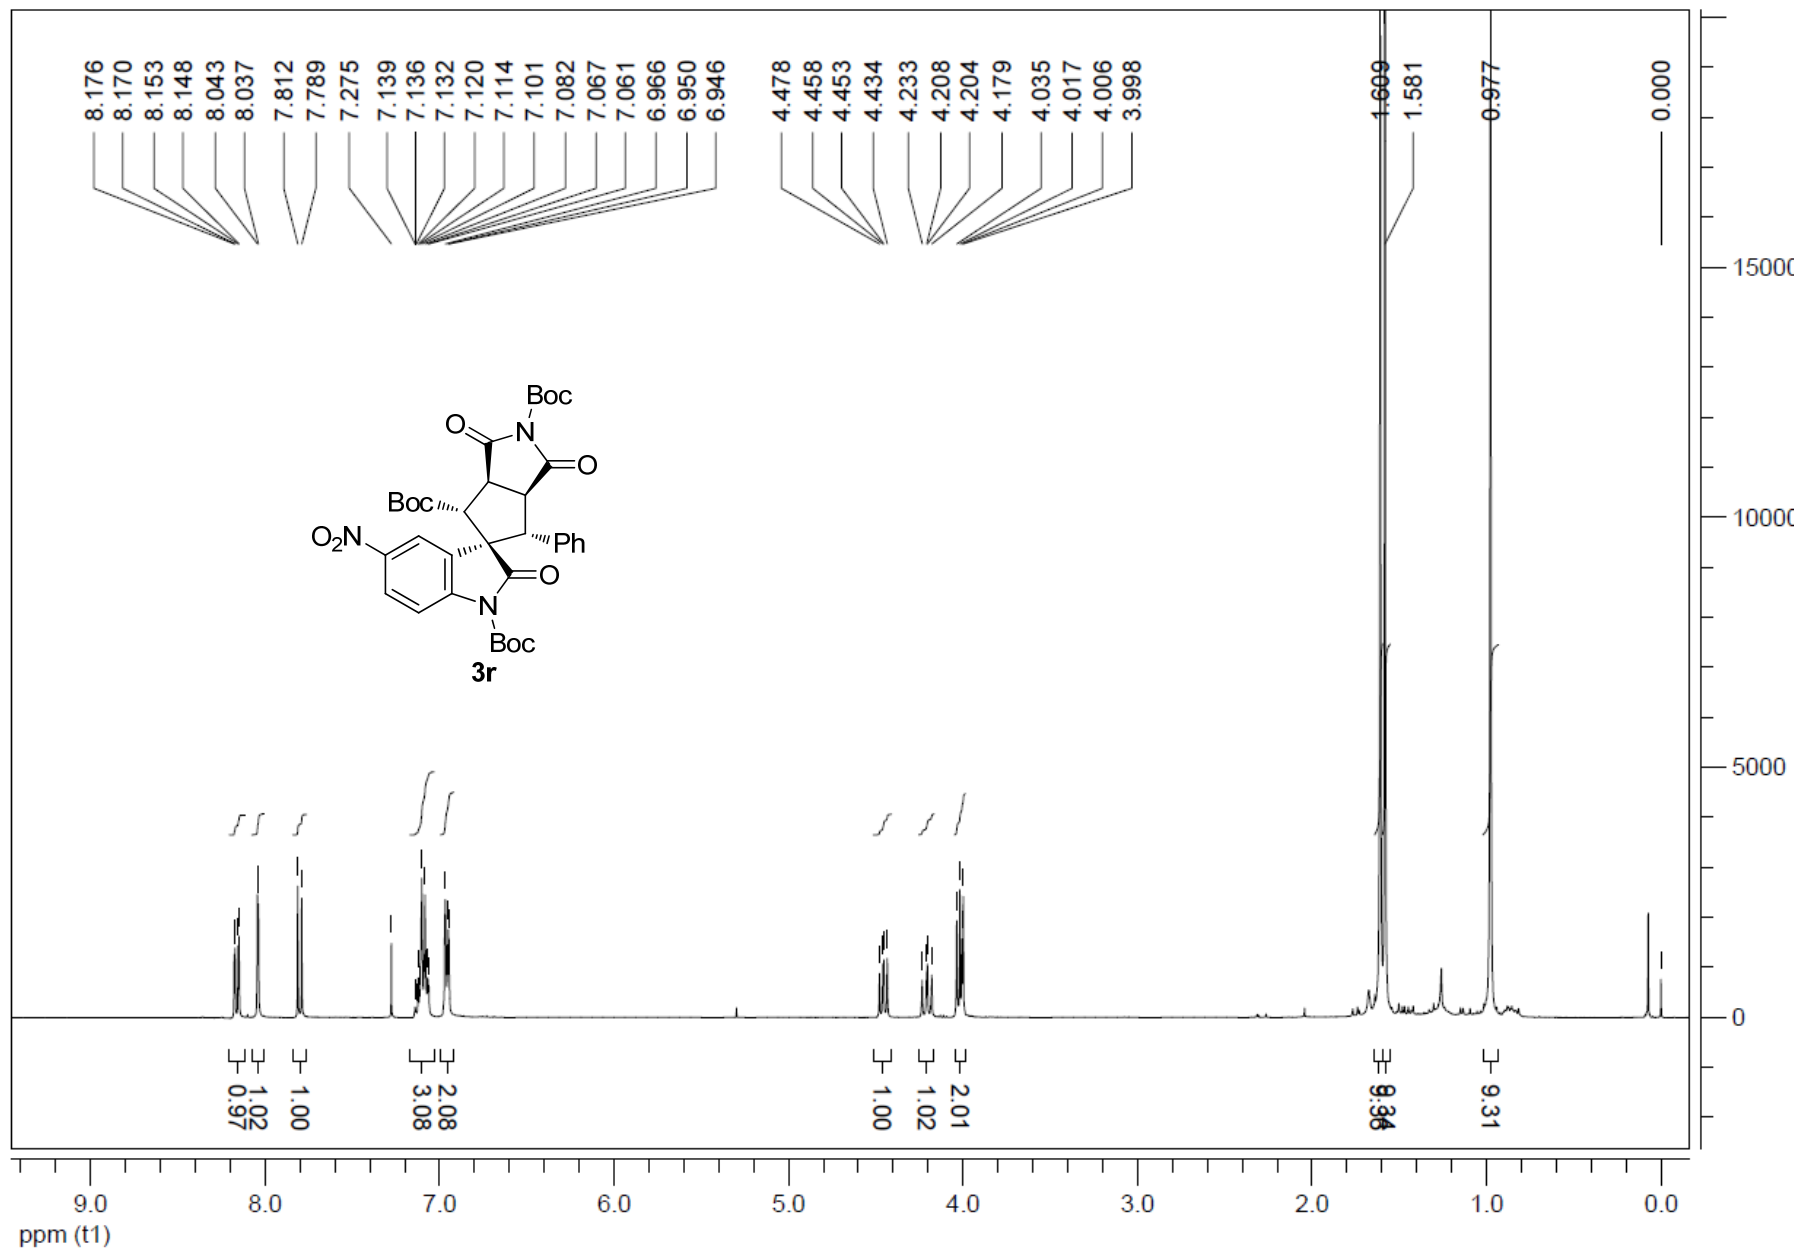

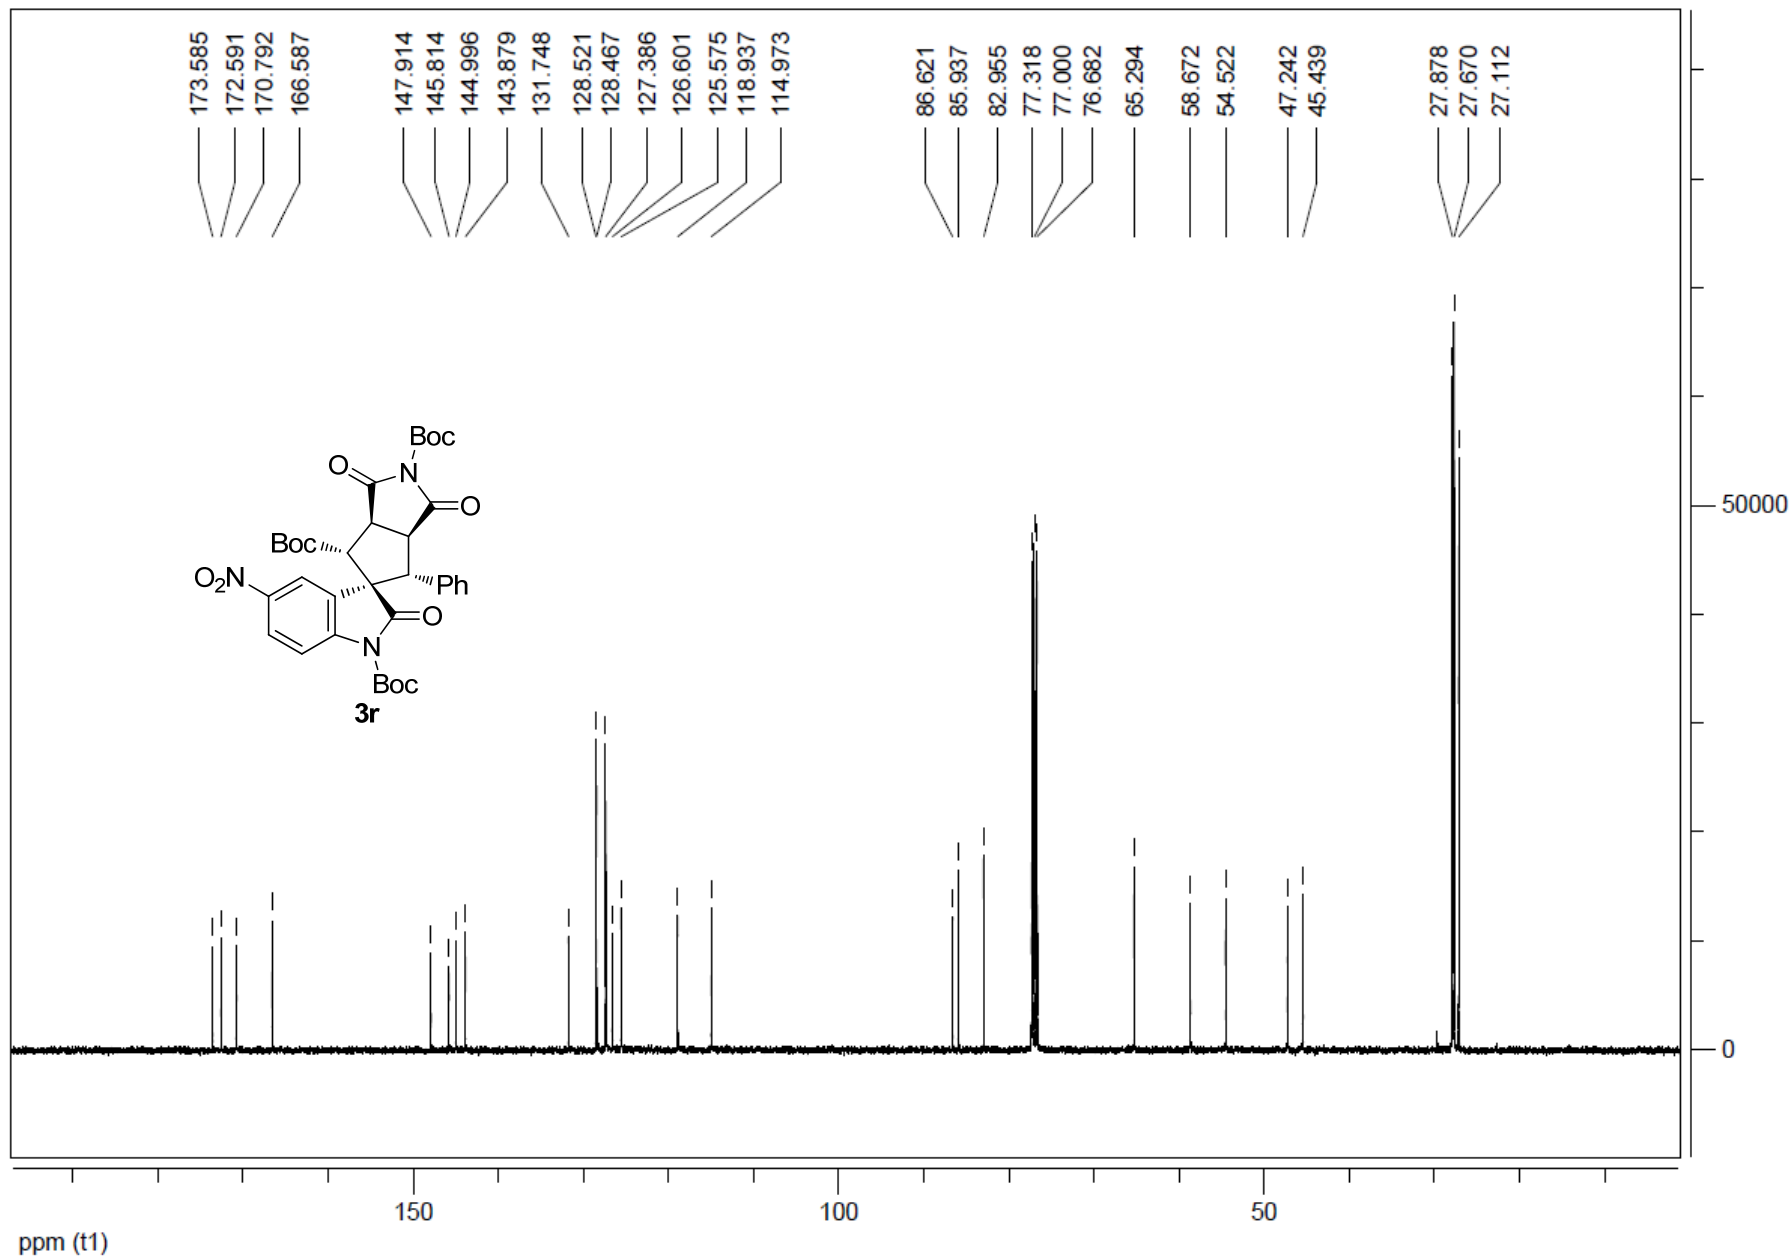

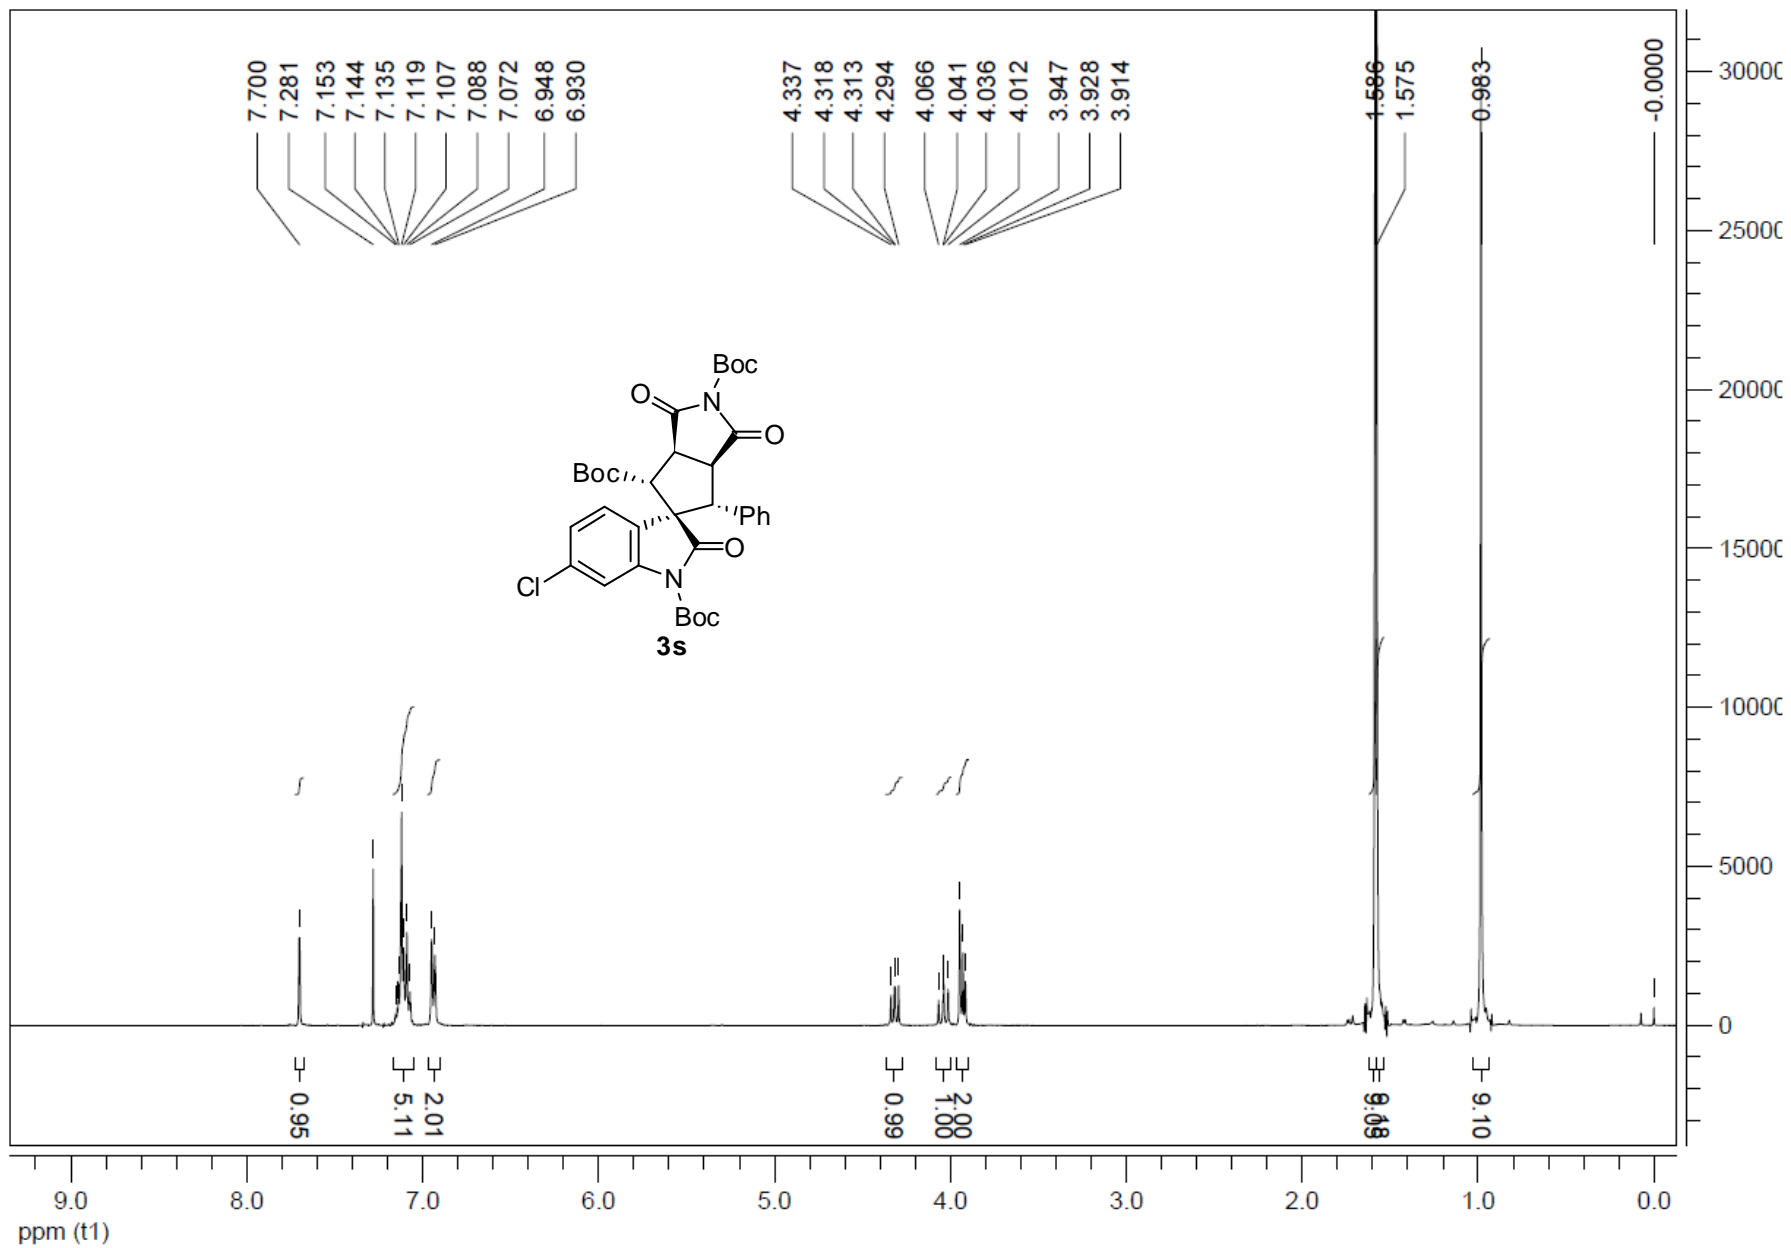

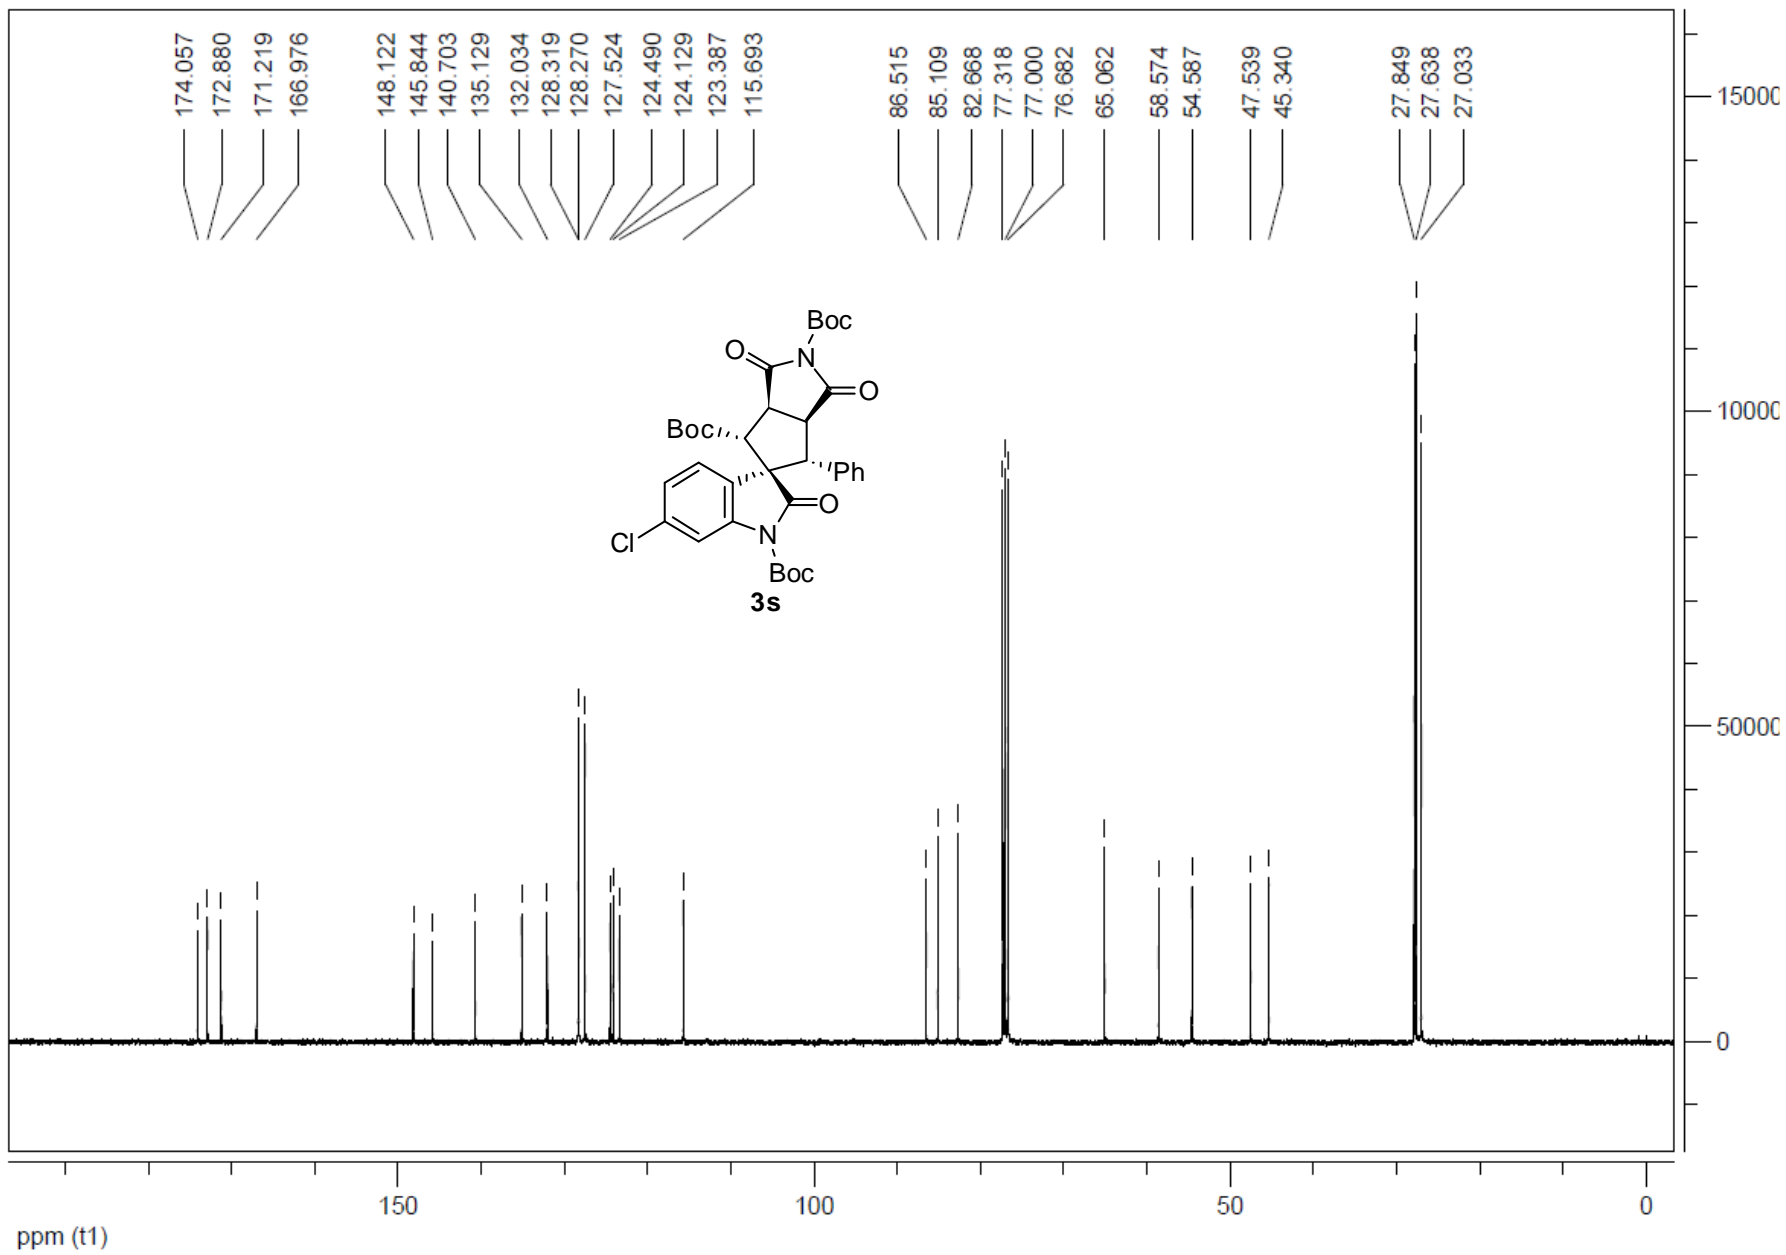



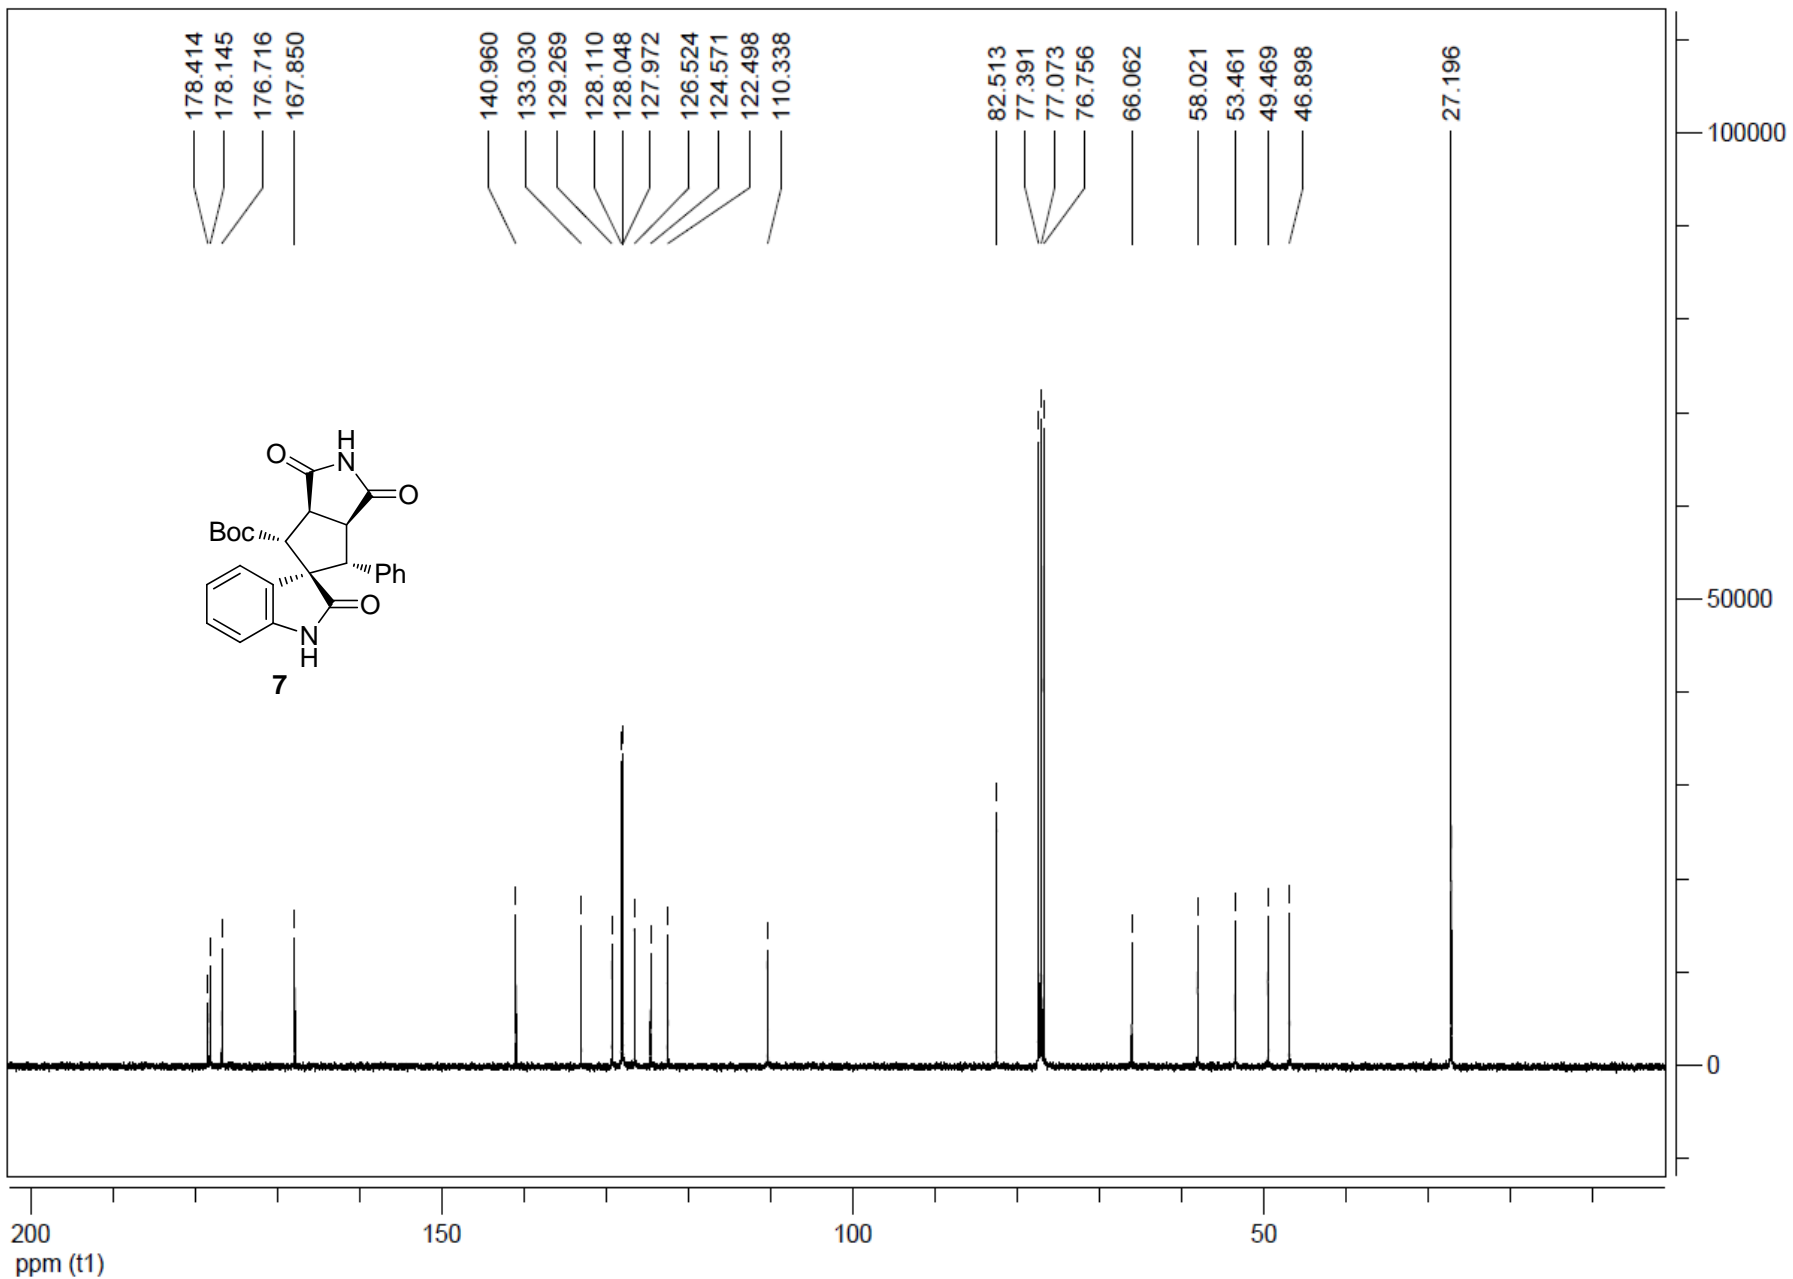

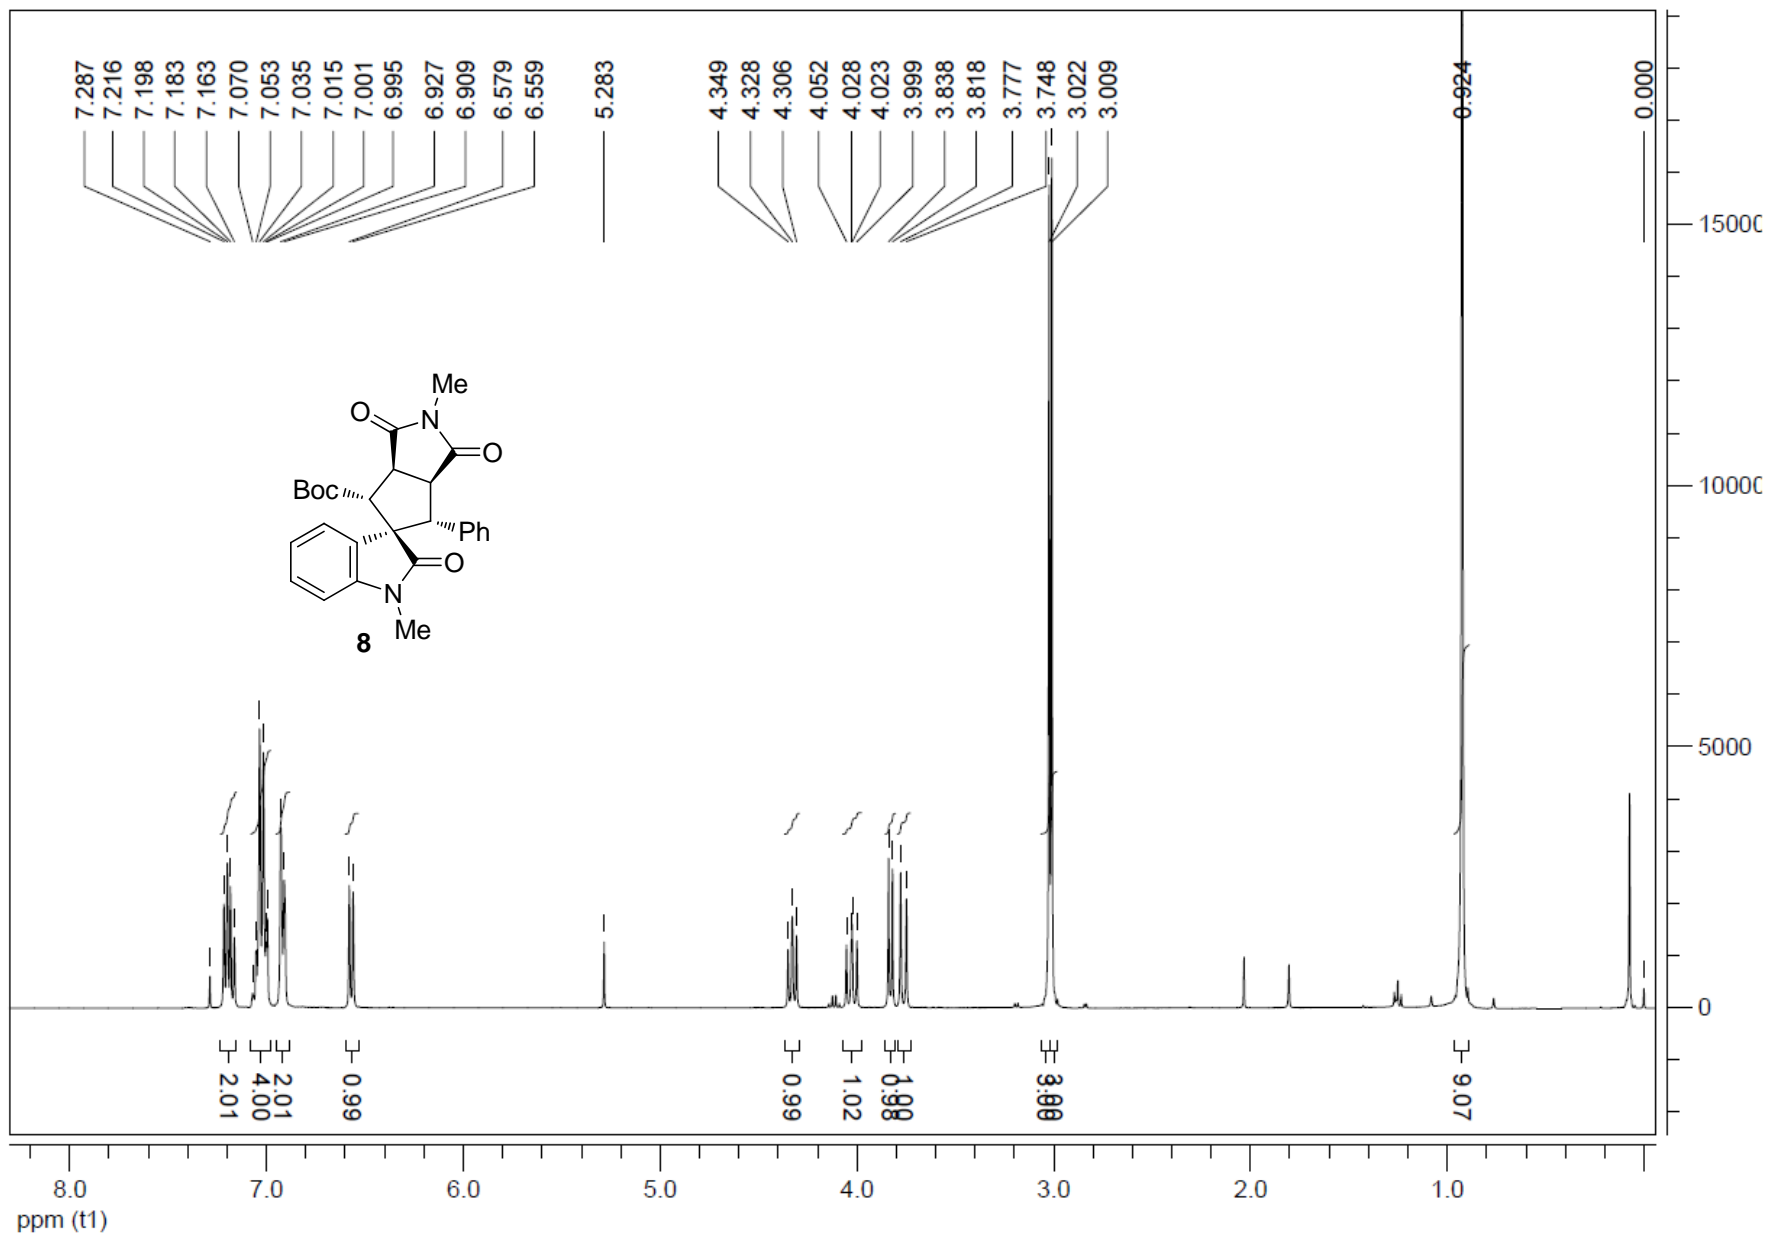

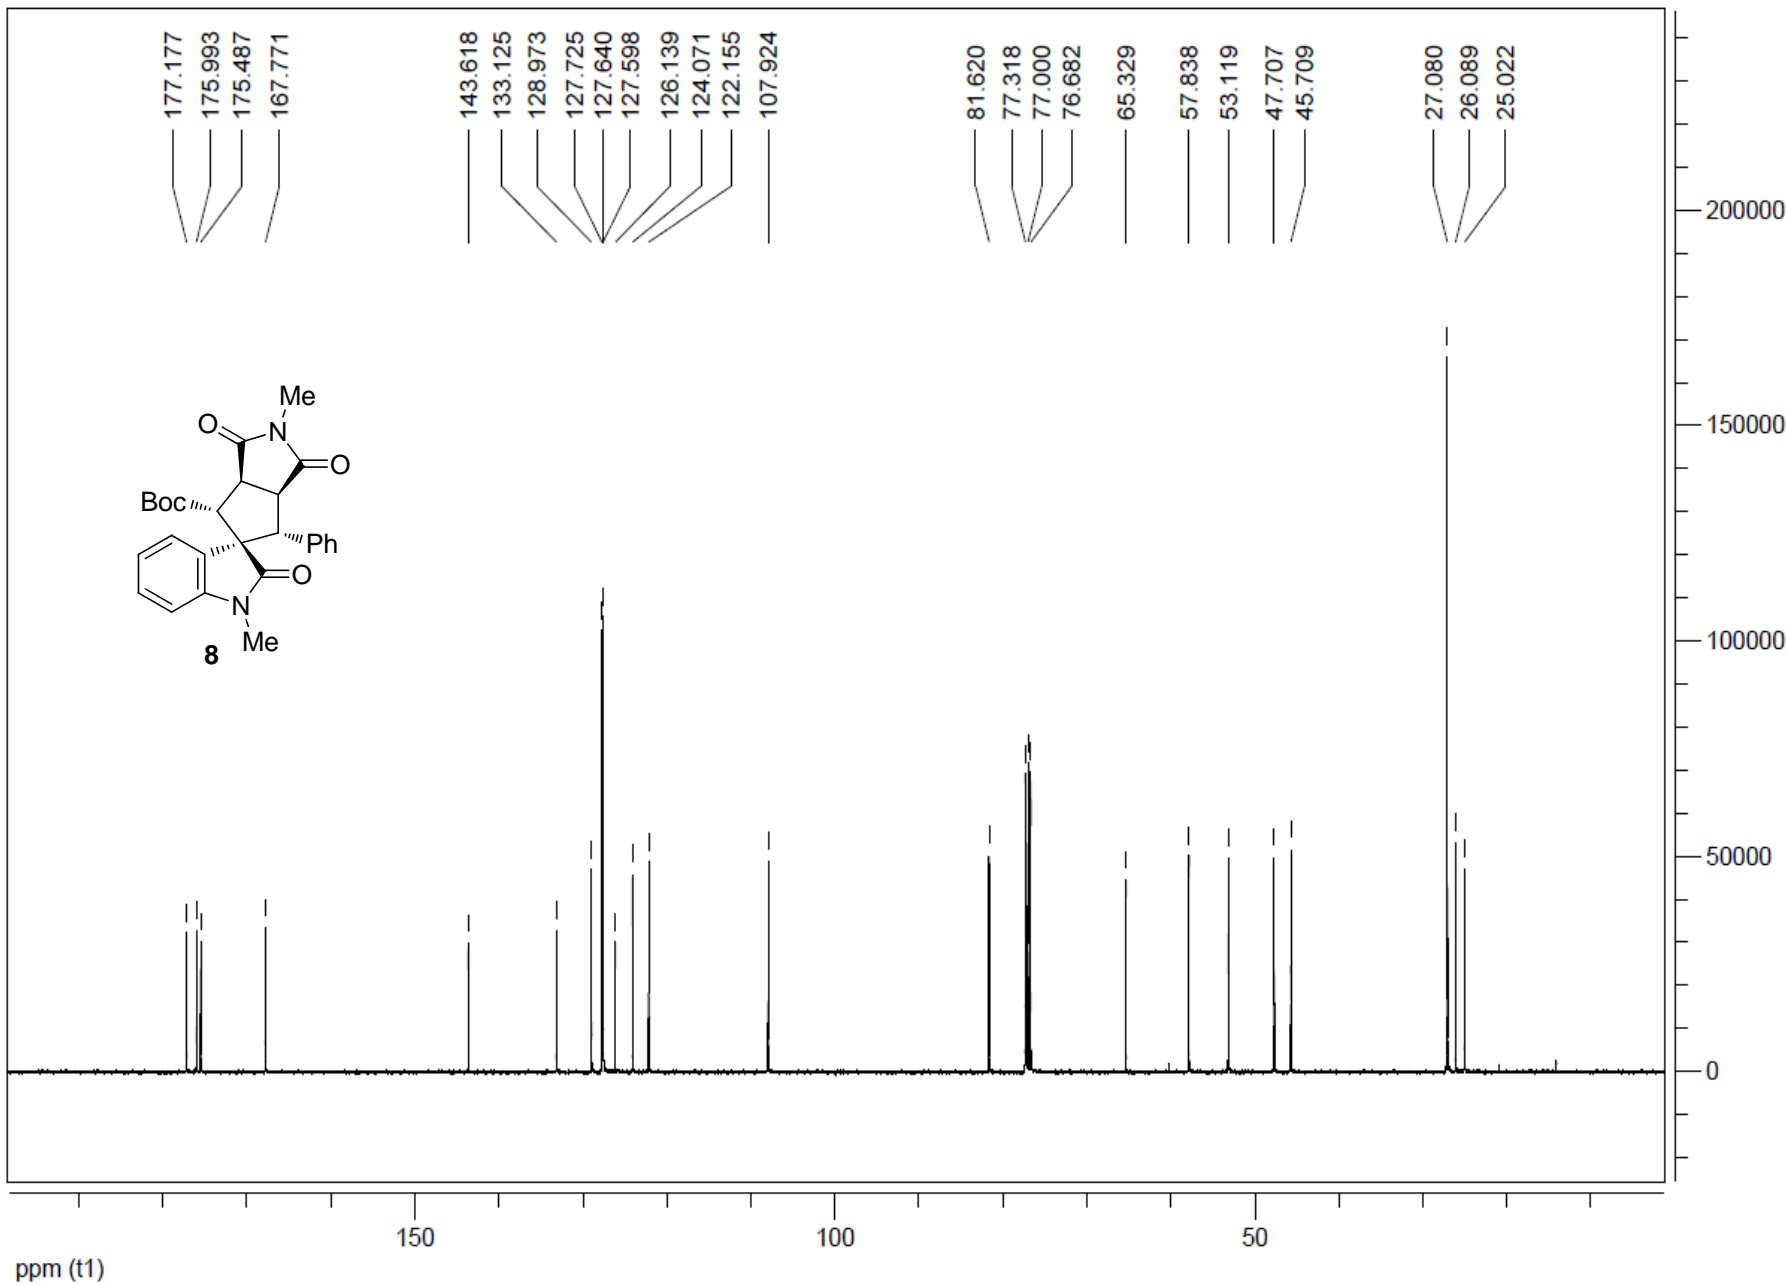



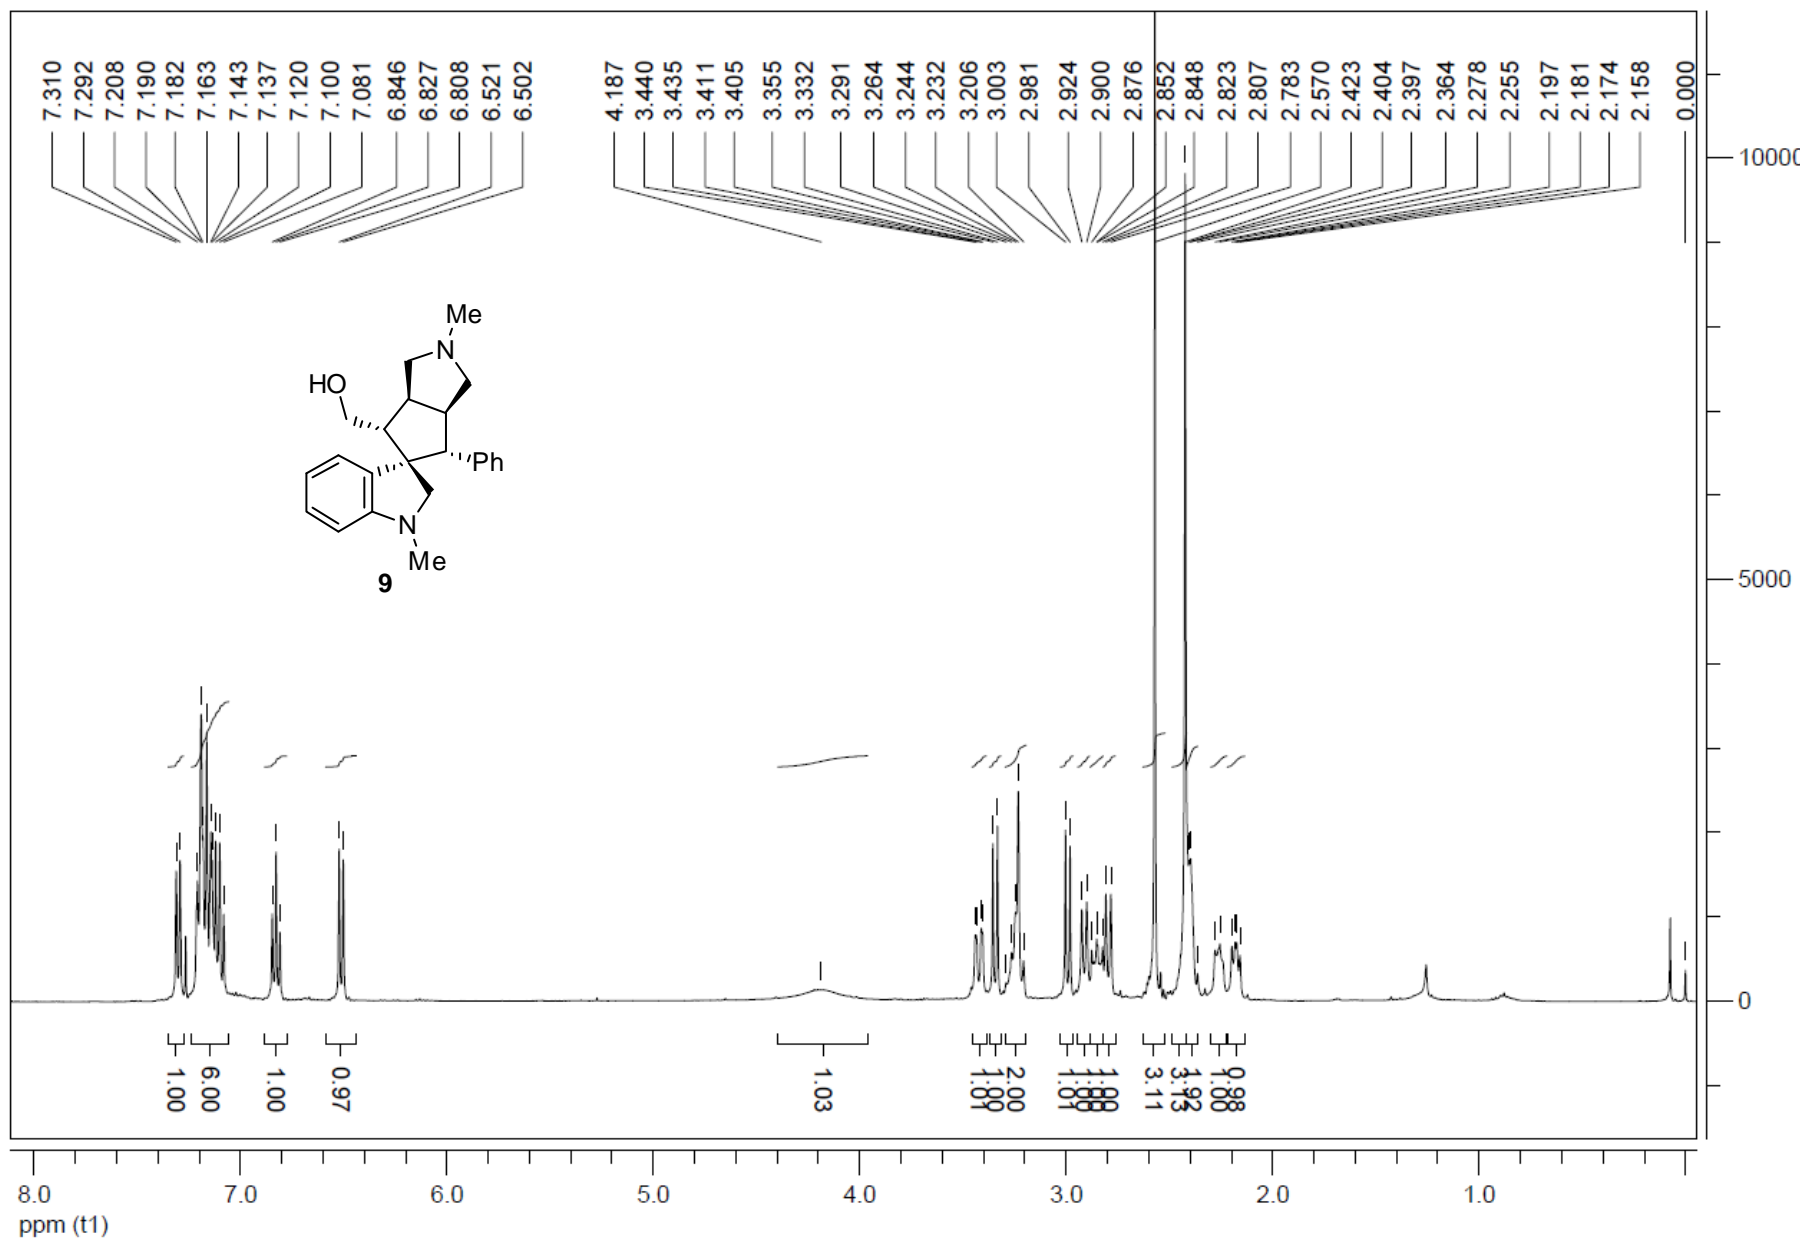

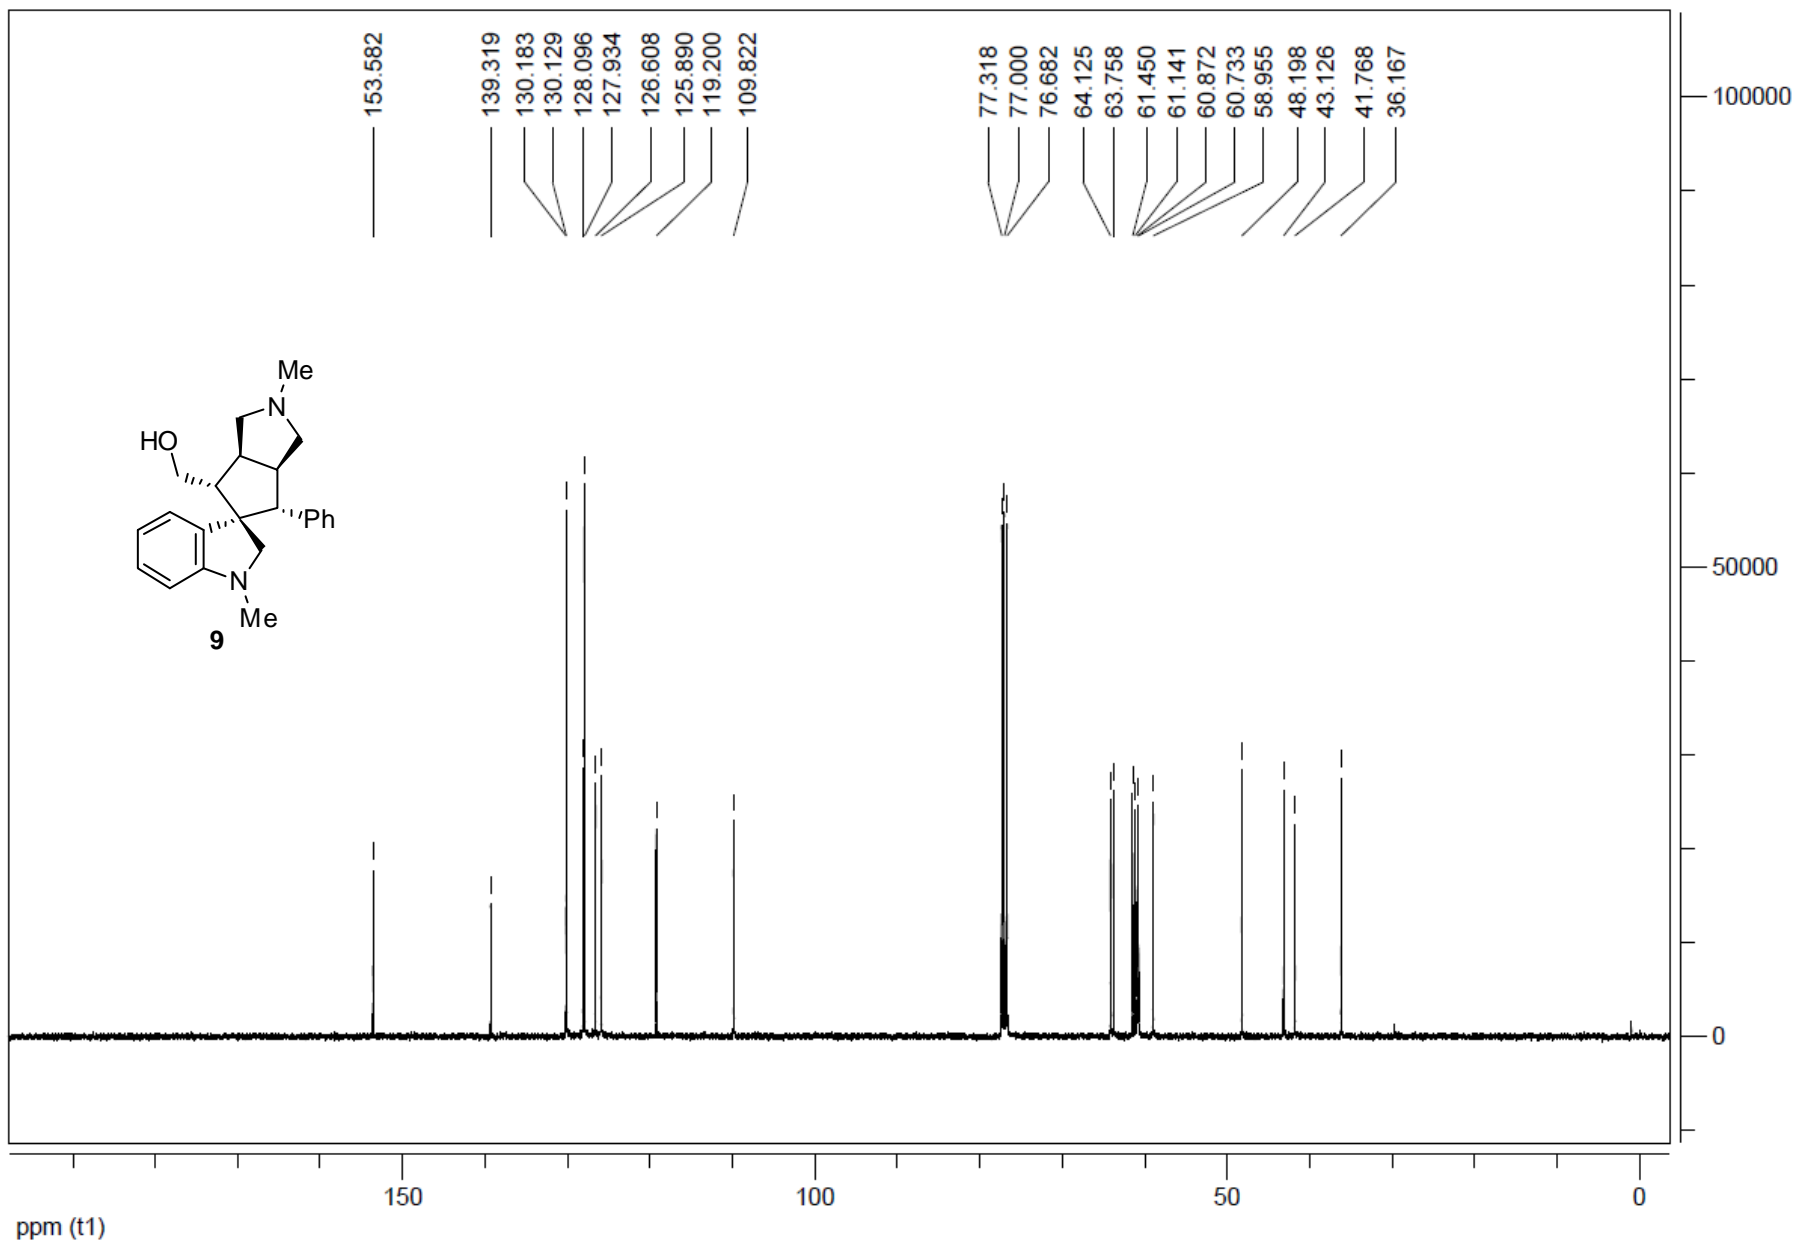



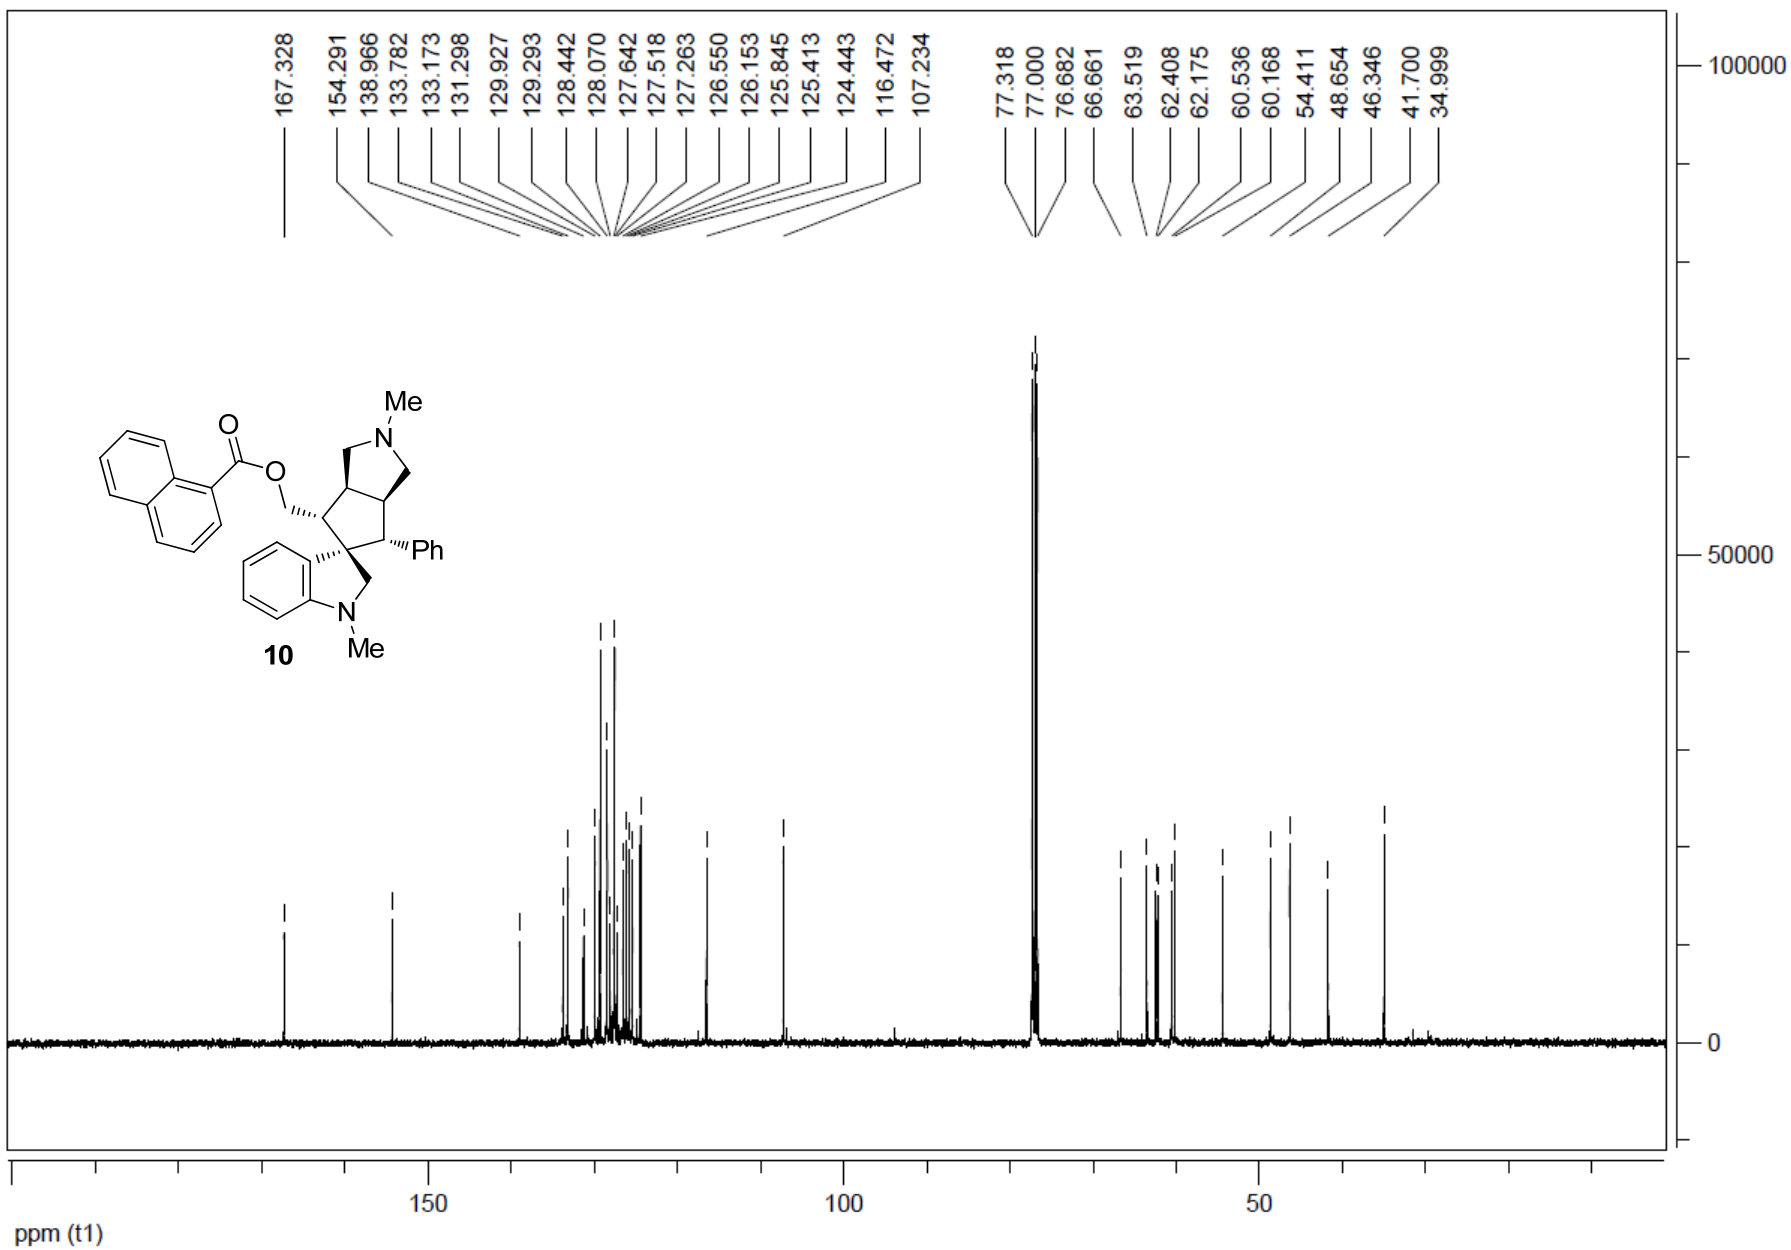





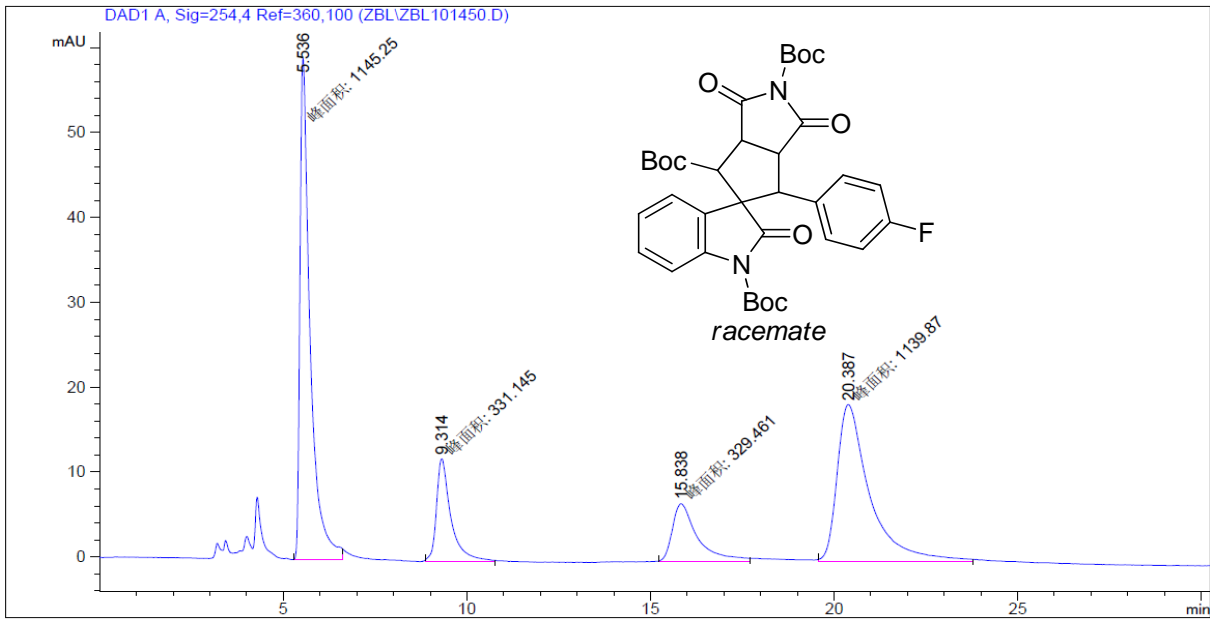

| Peak # | RetTime [min] | Type | Width [min] | Area [mAU*s] | Height [mAU] | Area %  |
|--------|---------------|------|-------------|--------------|--------------|---------|
| 1      | 5.536         | MM   | 0.3232      | 1145.25208   | 59.05415     | 38.8784 |
| 2      | 9.314         | MM   | 0.4570      | 331.14490    | 12.07667     | 11.2415 |
| 3      | 15.838        | MM   | 0.8040      | 329.46085    | 6.82925      | 11.1844 |
| 4      | 20.387        | MM   | 1.0284      | 1139.86877   | 18.47273     | 38.6957 |

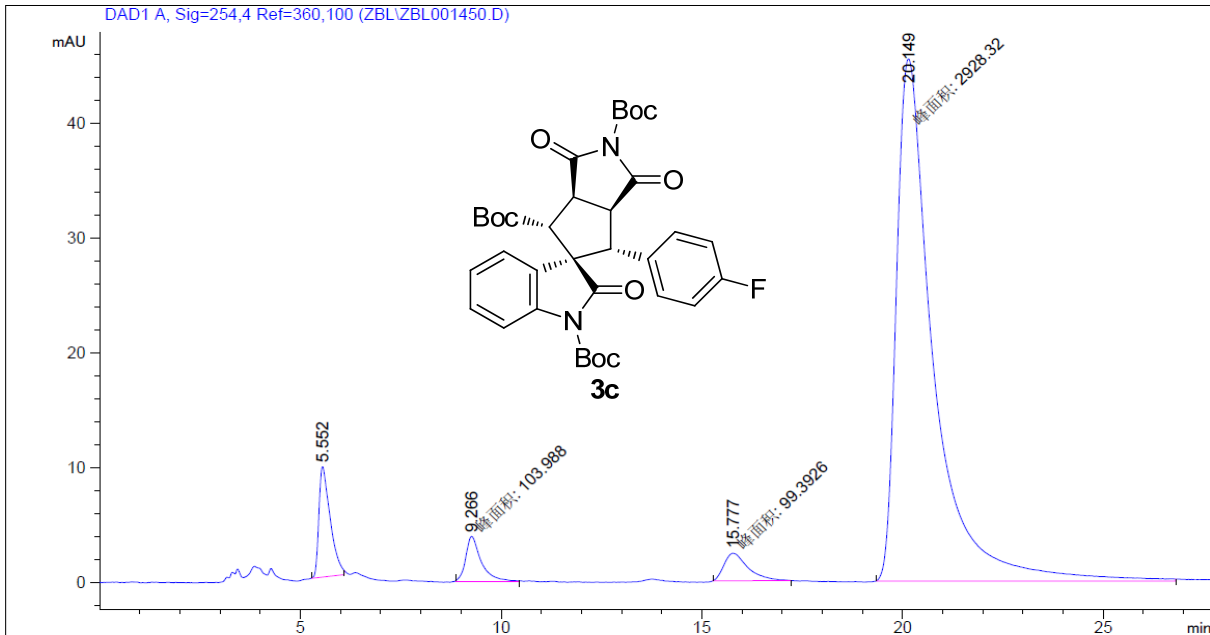

| Peak # | RetTime [min] | Type | Width [min] | Area [mAU*s] | Height [mAU] | Area %  |
|--------|---------------|------|-------------|--------------|--------------|---------|
| 1      | 5.552         | BB   | 0.2789      | 188.65700    | 9.61398      | 5.6818  |
| 2      | 9.266         | MM   | 0.4430      | 103.98769    | 3.91202      | 3.1318  |
| 3      | 15.777        | MM   | 0.6881      | 99.39258     | 2.40753      | 2.9934  |
| 4      | 20.149        | MM   | 1.0737      | 2928.32349   | 45.45622     | 88.1929 |

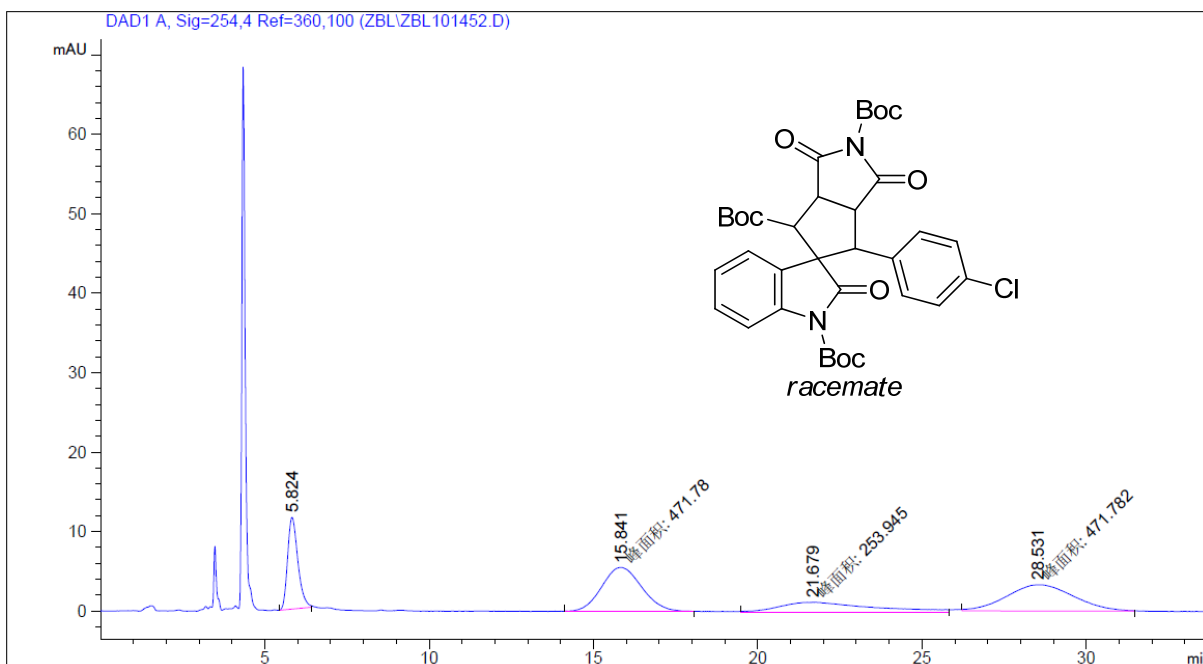

| Peak # | RetTime [min] | Type | Width [min] | Area [mAU*s] | Height [mAU] | Area %  |
|--------|---------------|------|-------------|--------------|--------------|---------|
| 1      | 5.824         | BB   | 0.3343      | 251.50803    | 11.53759     | 17.3572 |
| 2      | 15.841        | MM   | 1.4157      | 471.77975    | 5.55432      | 32.5586 |
| 3      | 21.679        | MM   | 3.3159      | 253.94531    | 1.27640      | 17.5254 |
| 4      | 28.531        | MM   | 2.3806      | 471.78229    | 3.30303      | 32.5588 |

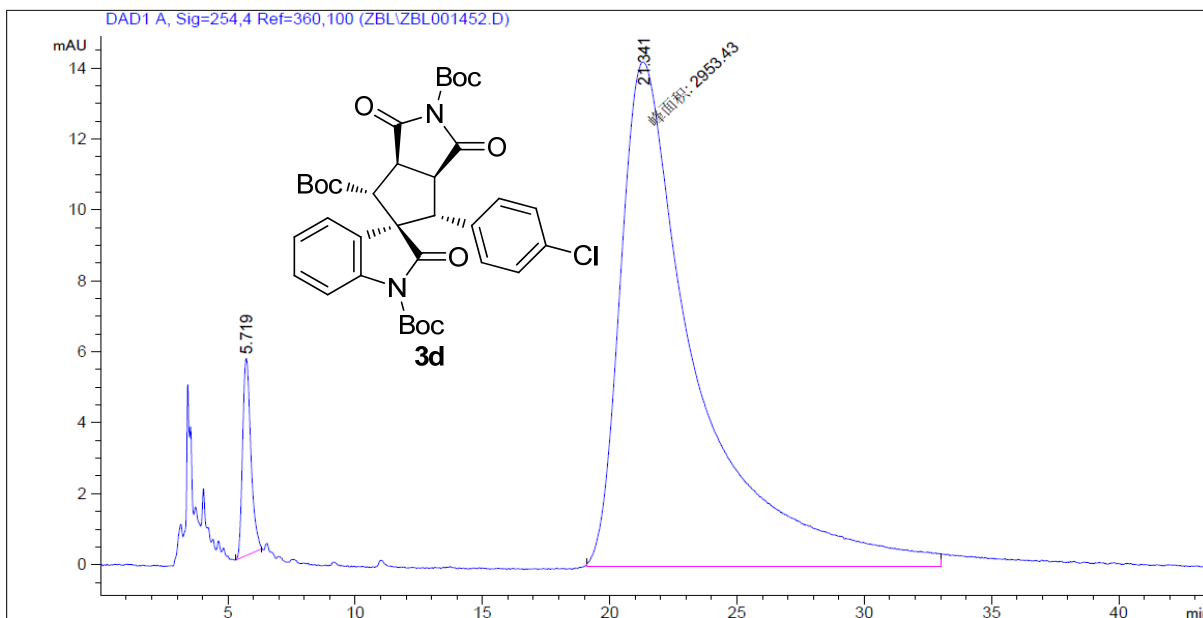

| Peak # | RetTime [min] | Type | Width [min] | Area [mAU*s] | Height [mAU] | Area %  |
|--------|---------------|------|-------------|--------------|--------------|---------|
| 1      | 5.719         | BB   | 0.3490      | 126.22916    | 5.55799      | 4.0988  |
| 2      | 21.341        | MM   | 3.4613      | 2953.42529   | 14.22135     | 95.9012 |



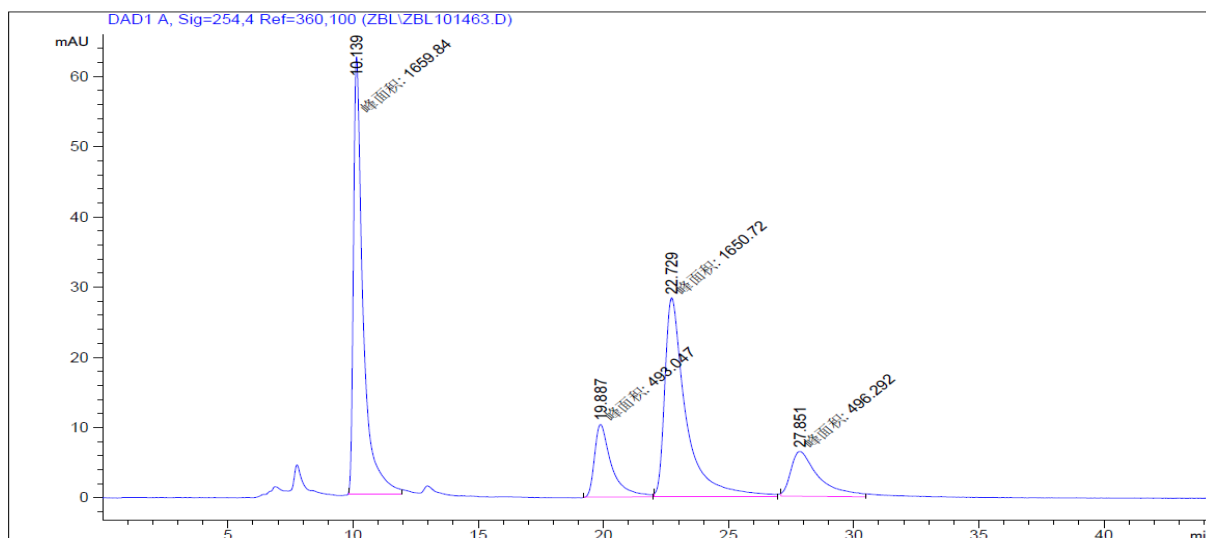

| Peak # | RetTime [min] | Type | Width [min] | Area [mAU*s] | Height [mAU] | Area %  |
|--------|---------------|------|-------------|--------------|--------------|---------|
| 1      | 10.139        | MM   | 0.4446      | 1659.83850   | 62.22473     | 38.6018 |
| 2      | 19.887        | MM   | 0.7936      | 493.04739    | 10.35415     | 11.4665 |
| 3      | 22.729        | MM   | 0.9737      | 1650.72266   | 28.25415     | 38.3898 |
| 4      | 27.851        | MM   | 1.2970      | 496.29221    | 6.37763      | 11.5419 |

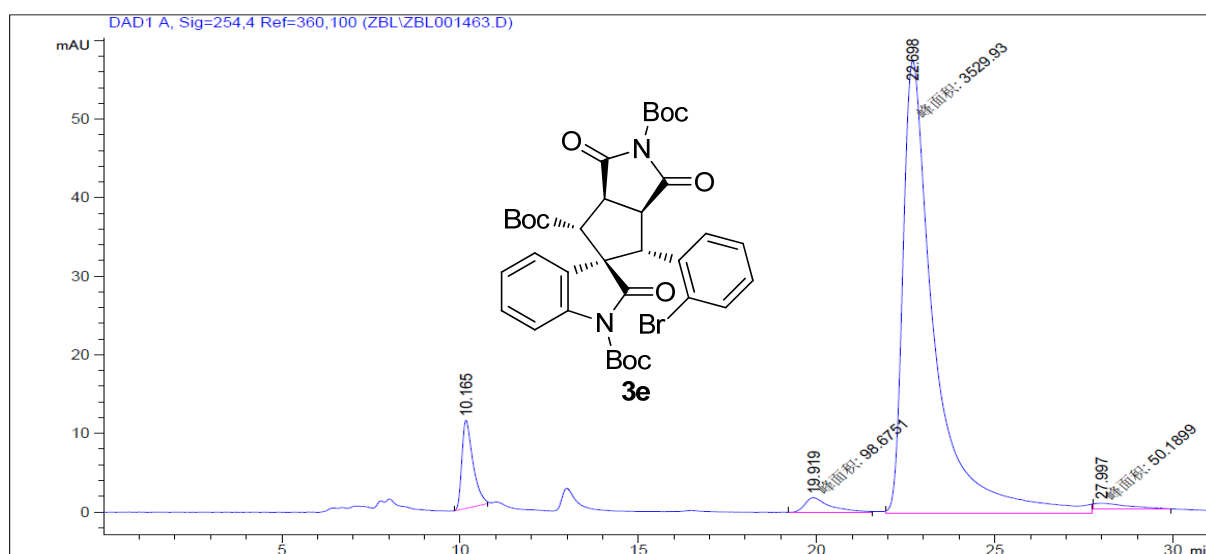

| Peak # | RetTime [min] | Type | Width [min] | Area [mAU*s] | Height [mAU] | Area %  |
|--------|---------------|------|-------------|--------------|--------------|---------|
| 1      | 10.165        | BB   | 0.3244      | 242.54337    | 11.20967     | 6.1852  |
| 2      | 19.919        | MM   | 0.8660      | 98.67513     | 1.89910      | 2.5164  |
| 3      | 22.698        | MM   | 1.0212      | 3529.93115   | 57.60817     | 90.0185 |
| 4      | 27.997        | MM   | 1.1358      | 50.18986     | 7.36506e-1   | 1.2799  |

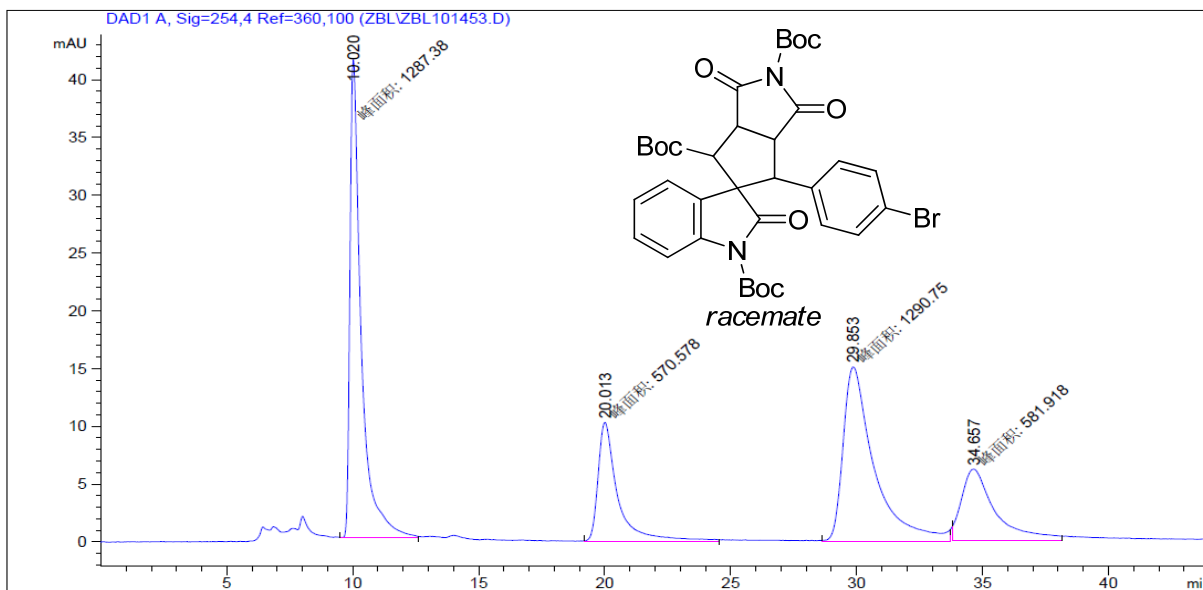

| Peak # | RetTime [min] | Type | Width [min] | Area [mAU*s] | Height [mAU] | Area %  |
|--------|---------------|------|-------------|--------------|--------------|---------|
| 1      | 10.020        | MM   | 0.5184      | 1287.37842   | 41.38658     | 34.5084 |
| 2      | 20.013        | MM   | 0.9226      | 570.57776    | 10.30688     | 15.2944 |
| 3      | 29.853        | MM   | 1.4282      | 1290.75110   | 15.06303     | 34.5988 |
| 4      | 34.657        | MM   | 1.5630      | 581.91779    | 6.20505      | 15.5984 |

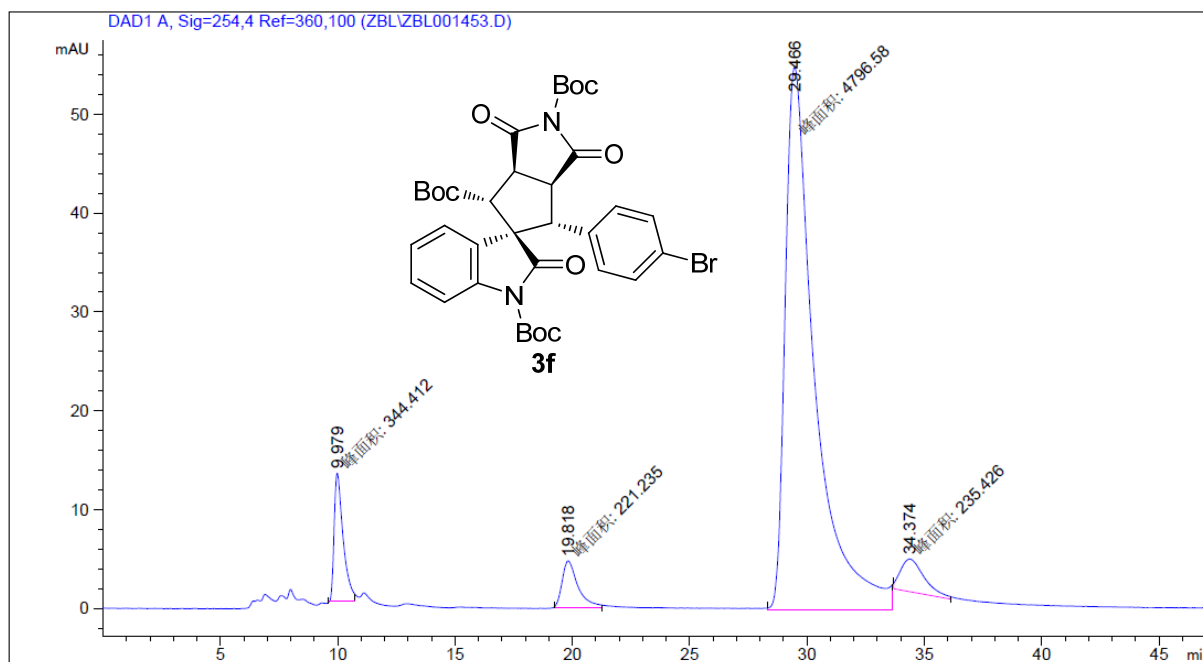

| Peak # | RetTime [min] | Type | Width [min] | Area [mAU*s] | Height [mAU] | Area %  |
|--------|---------------|------|-------------|--------------|--------------|---------|
| 1      | 9.979         | MM   | 0.4438      | 344.41232    | 12.93533     | 6.1528  |
| 2      | 19.818        | MM   | 0.7798      | 221.23482    | 4.72848      | 3.9523  |
| 3      | 29.466        | MM   | 1.4567      | 4796.58496   | 54.87965     | 85.6891 |
| 4      | 34.374        | MM   | 1.1841      | 235.42647    | 3.31366      | 4.2058  |



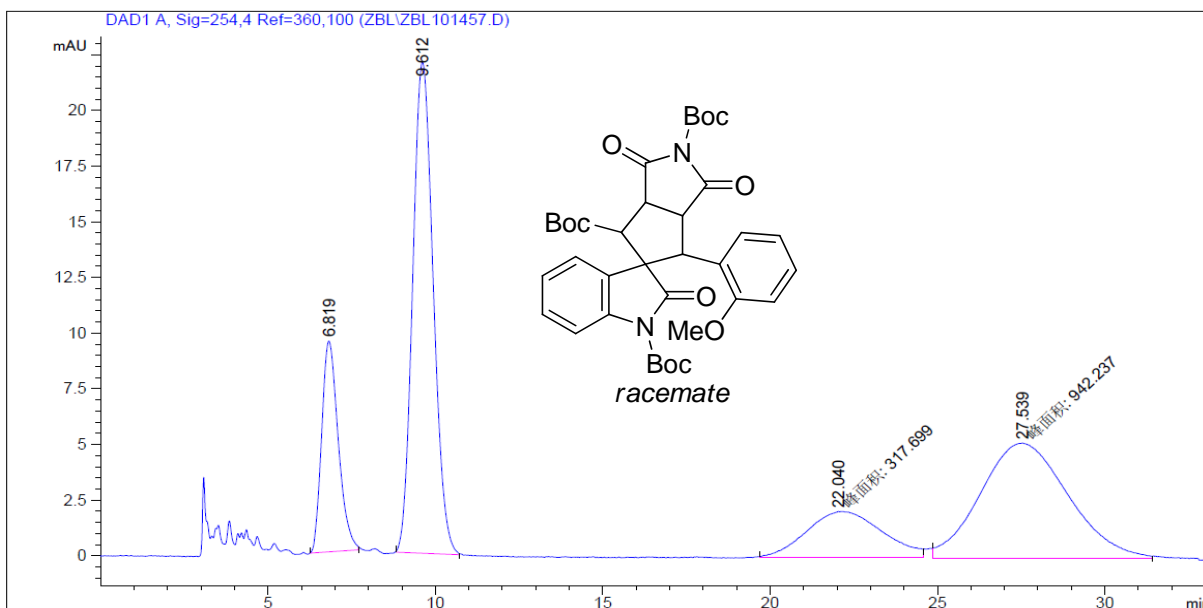

| Peak # | RetTime [min] | Type | Width [min] | Area [mAU*s] | Height [mAU] | Area %  |
|--------|---------------|------|-------------|--------------|--------------|---------|
| 1      | 6.819         | BB   | 0.5108      | 325.16452    | 9.46507      | 12.8930 |
| 2      | 9.612         | BB   | 0.6597      | 936.91516    | 22.04947     | 37.1495 |
| 3      | 22.040        | MM   | 2.5848      | 317.69852    | 2.04853      | 12.5970 |
| 4      | 27.539        | MM   | 3.0306      | 942.23749    | 5.18177      | 37.3605 |

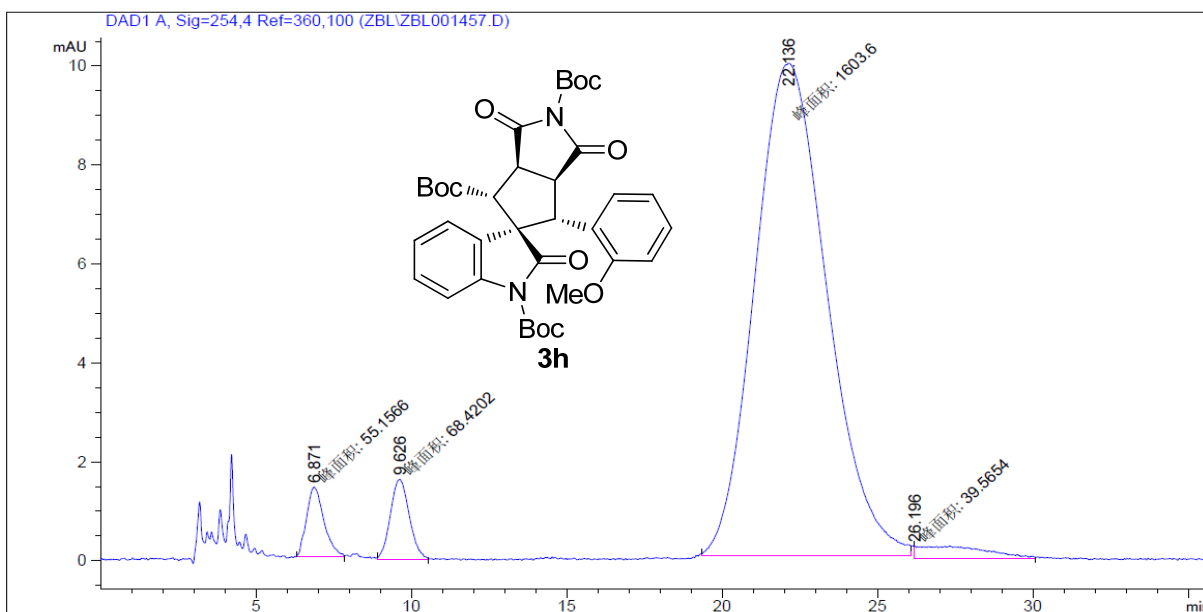

| Peak # | RetTime [min] | Type | Width [min] | Area [mAU*s] | Height [mAU] | Area %  |
|--------|---------------|------|-------------|--------------|--------------|---------|
| 1      | 6.871         | MM   | 0.6489      | 55.15655     | 1.41673      | 3.1219  |
| 2      | 9.626         | MM   | 0.7043      | 68.42015     | 1.61902      | 3.8727  |
| 3      | 22.136        | MM   | 2.6839      | 1603.59570   | 9.95803      | 90.7659 |
| 4      | 26.196        | MM   | 1.8027      | 39.56542     | 2.58008e-1   | 2.2395  |

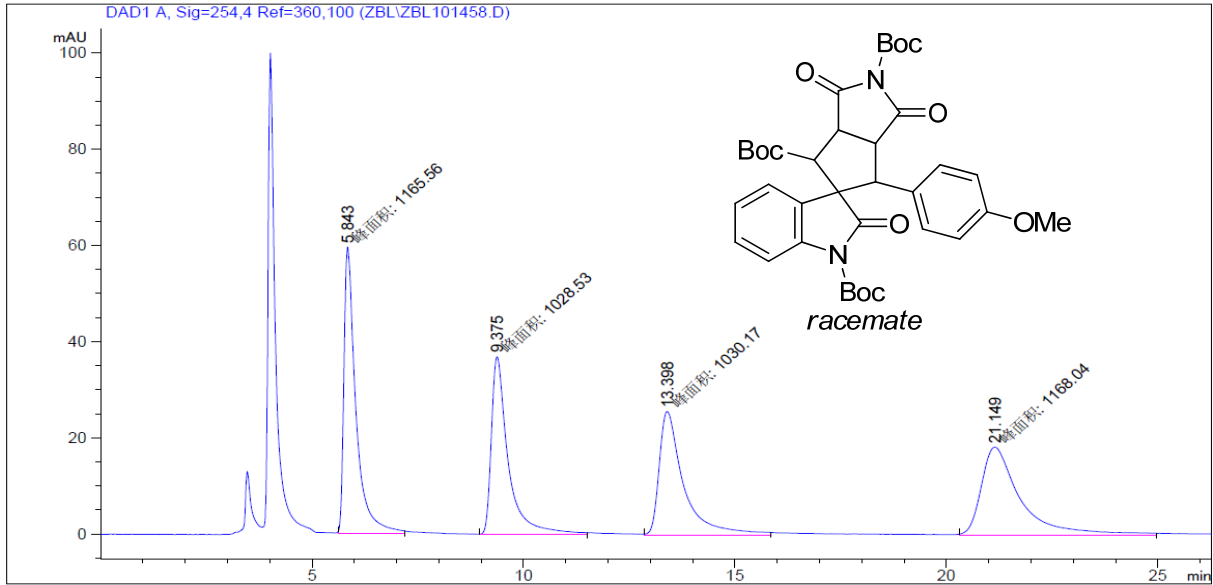

| Peak # | RetTime [min] | Type | Width [min] | Area [mAU*s] | Height [mAU] | Area %  |
|--------|---------------|------|-------------|--------------|--------------|---------|
| 1      | 5.843         | MM   | 0.3264      | 1165.55969   | 59.51390     | 26.5365 |
| 2      | 9.375         | MM   | 0.4640      | 1028.53064   | 36.94677     | 23.4167 |
| 3      | 13.398        | MM   | 0.6693      | 1030.16748   | 25.65305     | 23.4540 |
| 4      | 21.149        | MM   | 1.0681      | 1168.03882   | 18.22679     | 26.5929 |

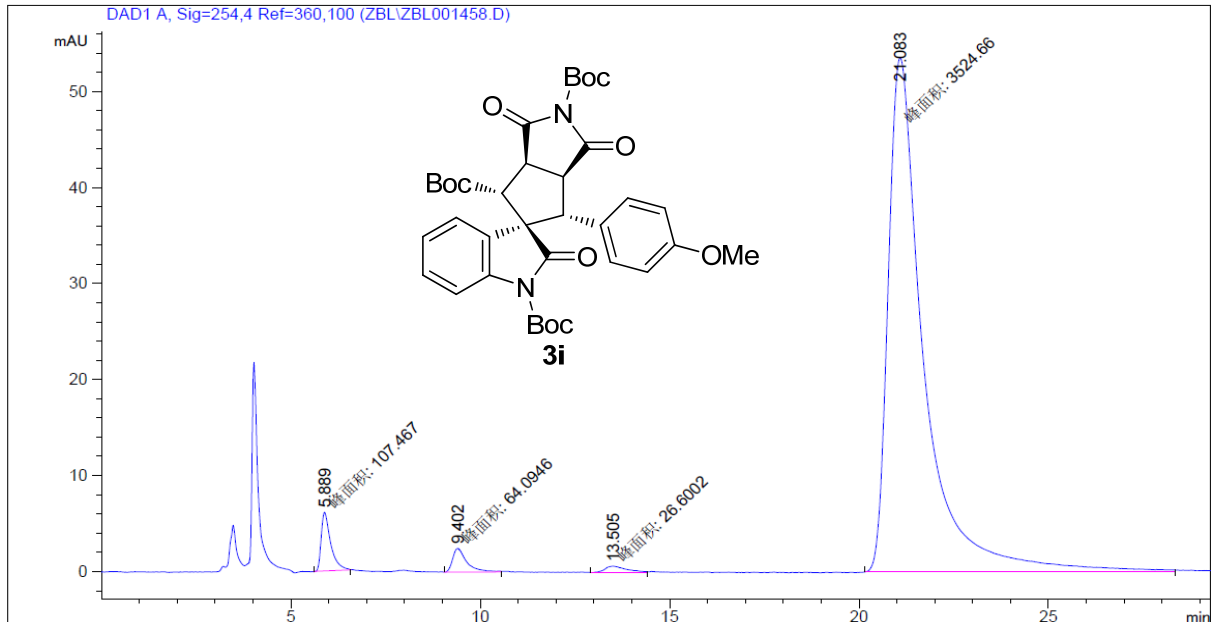

| Peak # | RetTime [min] | Type | Width [min] | Area [mAU*s] | Height [mAU] | Area %  |
|--------|---------------|------|-------------|--------------|--------------|---------|
| 1      | 5.889         | MM   | 0.2930      | 107.46729    | 6.11226      | 2.8867  |
| 2      | 9.402         | MM   | 0.4303      | 64.09457     | 2.48274      | 1.7217  |
| 3      | 13.505        | MM   | 0.6635      | 26.60025     | 6.68142e-1   | 0.7145  |
| 4      | 21.083        | MM   | 1.0971      | 3524.65845   | 53.54668     | 94.6771 |

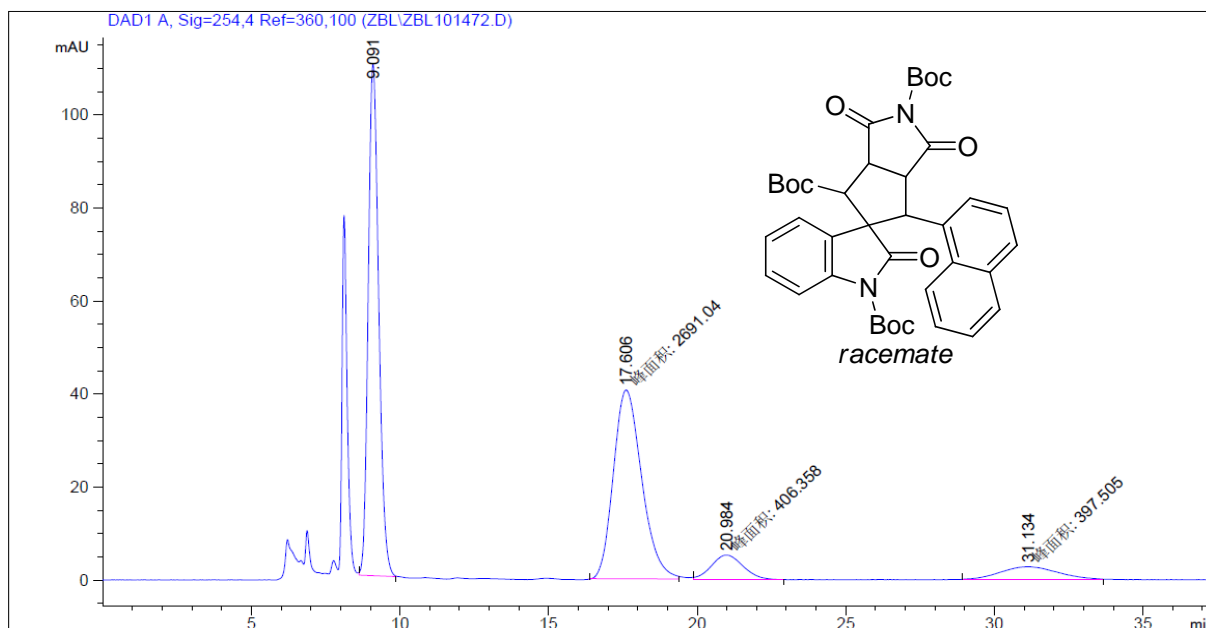

| Peak # | RetTime [min] | Type | Width [min] | Area [mAU*s] | Height [mAU] | Area %  |
|--------|---------------|------|-------------|--------------|--------------|---------|
| 1      | 9.091         | BB   | 0.3821      | 2697.24243   | 109.98201    | 43.5591 |
| 2      | 17.606        | MM   | 1.1045      | 2691.04175   | 40.60697     | 43.4589 |
| 3      | 20.984        | MM   | 1.2608      | 406.35751    | 5.37148      | 6.5625  |
| 4      | 31.134        | MM   | 2.3298      | 397.50500    | 2.84365      | 6.4195  |

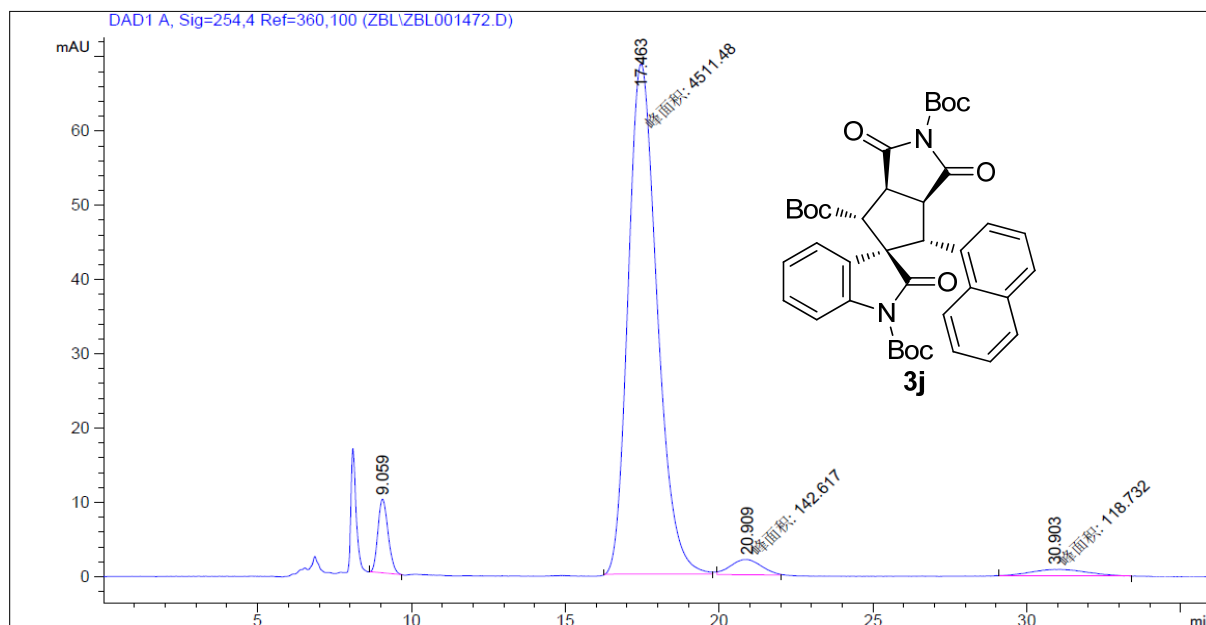

| Peak # | RetTime [min] | Type | Width [min] | Area [mAU*s] | Height [mAU] | Area %  |
|--------|---------------|------|-------------|--------------|--------------|---------|
| 1      | 9.059         | BB   | 0.3516      | 229.16571    | 9.91719      | 4.5815  |
| 2      | 17.463        | MM   | 1.0938      | 4511.48437   | 68.74028     | 90.1936 |
| 3      | 20.909        | MM   | 1.1549      | 142.61716    | 2.05807      | 2.8512  |
| 4      | 30.903        | MM   | 2.1654      | 118.73232    | 9.13872e-1   | 2.3737  |

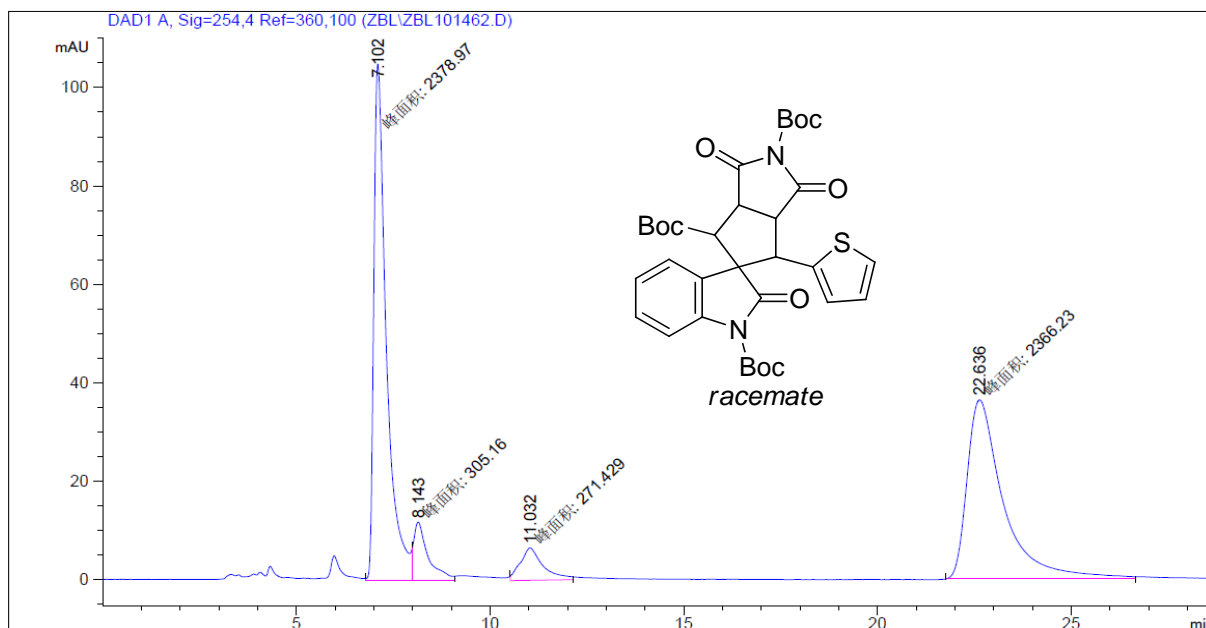

| Peak # | RetTime [min] | Type | Width [min] | Area [mAU*s] | Height [mAU] | Area %  |
|--------|---------------|------|-------------|--------------|--------------|---------|
| 1      | 7.102         | MM   | 0.3774      | 2378.97168   | 105.05898    | 44.7024 |
| 2      | 8.143         | MM   | 0.4273      | 305.16031    | 11.90240     | 5.7342  |
| 3      | 11.032        | MM   | 0.6897      | 271.42880    | 6.55893      | 5.1003  |
| 4      | 22.636        | MM   | 1.0844      | 2366.23437   | 36.36885     | 44.4631 |

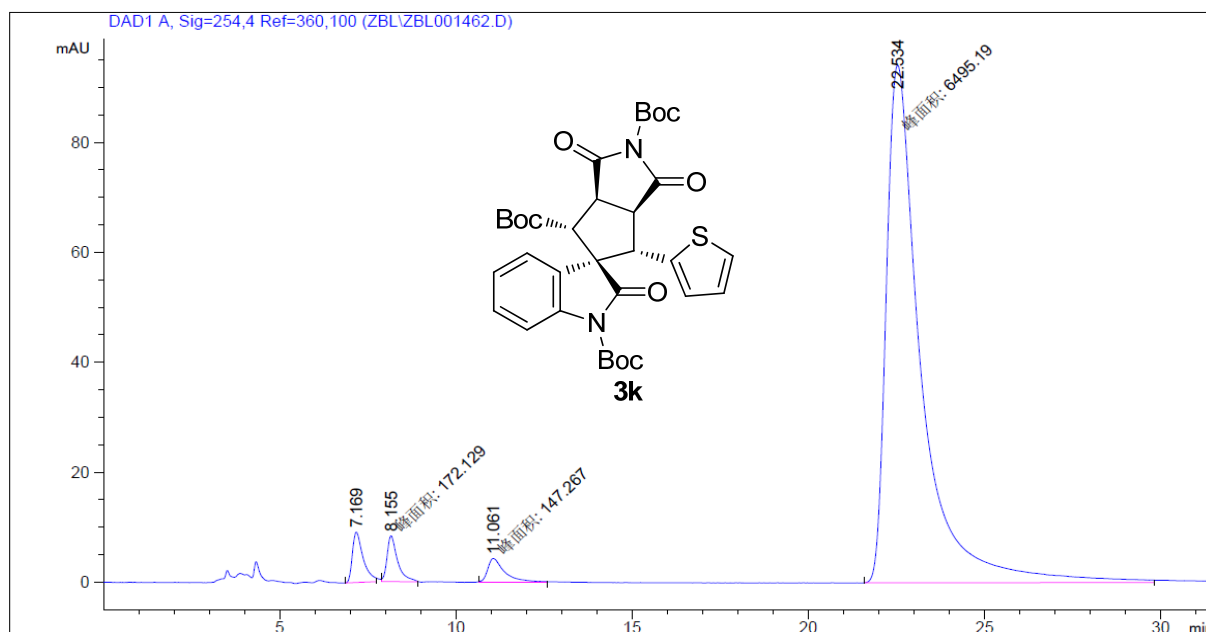

| Peak # | RetTime [min] | Type | Width [min] | Area [mAU*s] | Height [mAU] | Area %  |
|--------|---------------|------|-------------|--------------|--------------|---------|
| 1      | 7.169         | BB   | 0.3117      | 194.34605    | 9.15334      | 2.7728  |
| 2      | 8.155         | MM   | 0.3452      | 172.12914    | 8.31134      | 2.4559  |
| 3      | 11.061        | MM   | 0.5665      | 147.26675    | 4.33229      | 2.1011  |
| 4      | 22.534        | MM   | 1.1504      | 6495.19189   | 94.10136     | 92.6702 |

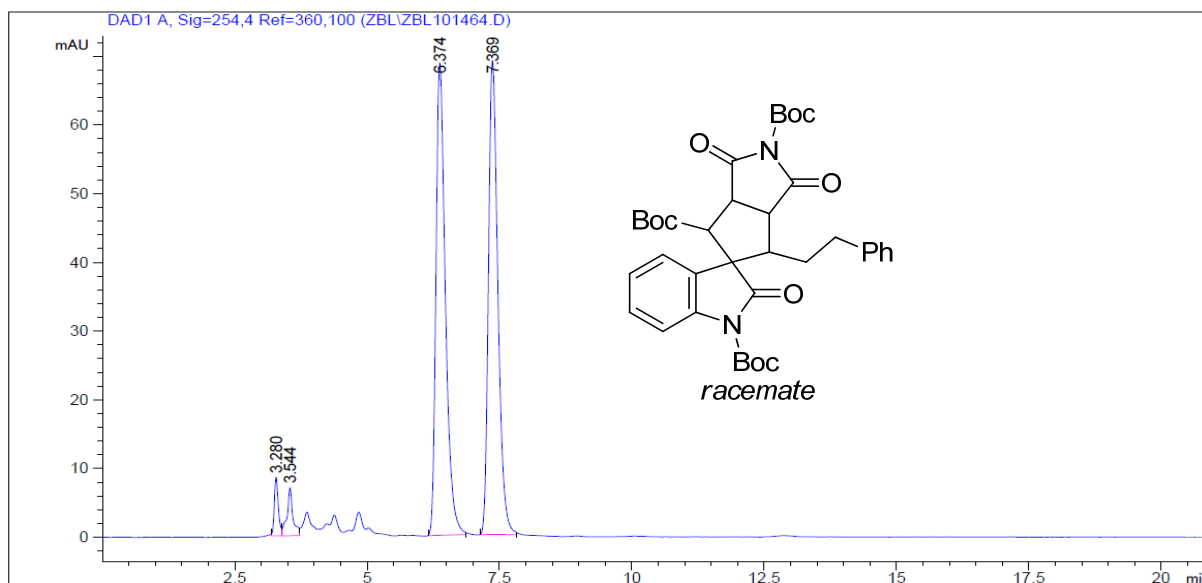

| Peak # | RetTime [min] | Type | Width [min] | Area [mAU*s] | Height [mAU] | Area %  |
|--------|---------------|------|-------------|--------------|--------------|---------|
| 1      | 3.280         | BV   | 0.0801      | 45.67750     | 8.58173      | 2.5327  |
| 2      | 3.544         | VB   | 0.1081      | 54.07652     | 6.99914      | 2.9984  |
| 3      | 6.374         | BB   | 0.1882      | 850.41113    | 68.82379     | 47.1531 |
| 4      | 7.369         | BB   | 0.1902      | 853.34680    | 69.02339     | 47.3158 |

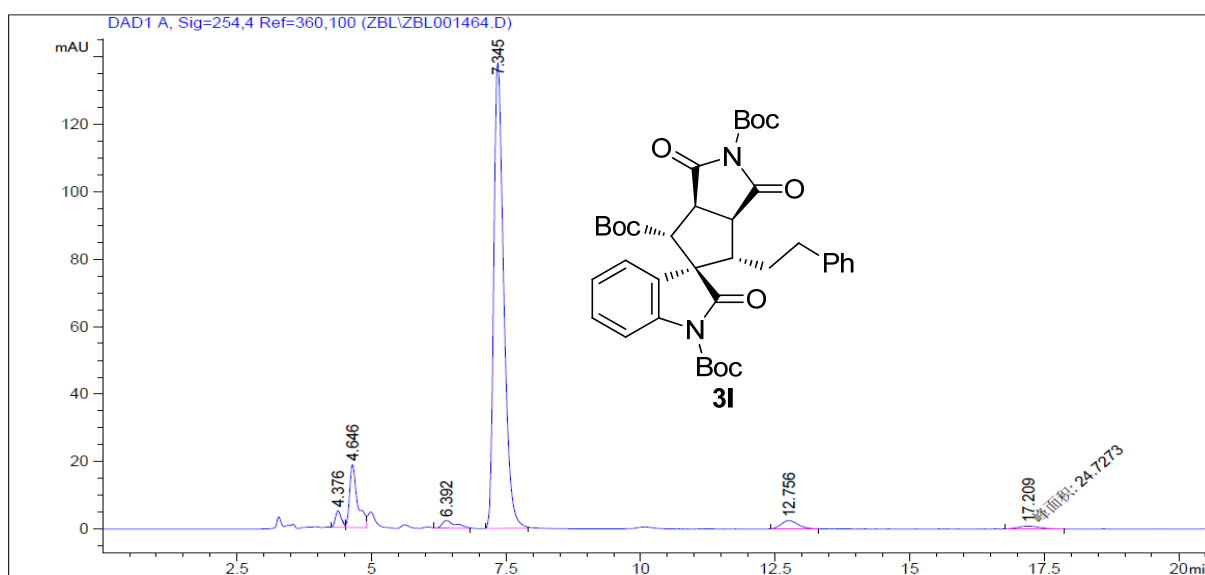

| Peak # | RetTime [min] | Type | Width [min] | Area [mAU*s] | Height [mAU] | Area %  |
|--------|---------------|------|-------------|--------------|--------------|---------|
| 1      | 4.376         | BV   | 0.1185      | 37.92332     | 4.89031      | 1.7879  |
| 2      | 4.646         | VV   | 0.1496      | 191.44055    | 18.67562     | 9.0254  |
| 3      | 6.392         | BB   | 0.2483      | 39.37080     | 2.24844      | 1.8561  |
| 4      | 7.345         | BB   | 0.1959      | 1774.58765   | 138.07240    | 83.6622 |
| 5      | 12.756        | BB   | 0.3353      | 53.08363     | 2.44516      | 2.5026  |
| 6      | 17.209        | MM   | 0.4835      | 24.72729     | 8.52379e-1   | 1.1658  |



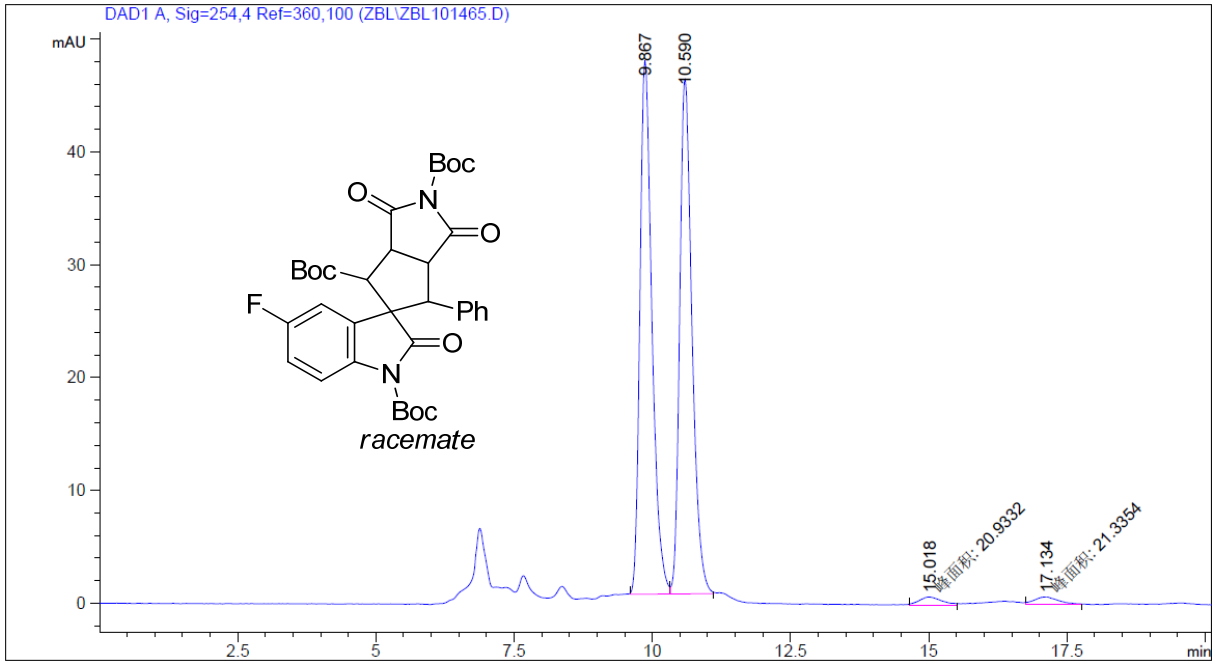

| Peak # | RetTime [min] | Type | Width [min] | Area [mAU*s] | Height [mAU] | Area %  |
|--------|---------------|------|-------------|--------------|--------------|---------|
| 1      | 9.867         | BV   | 0.2302      | 714.49634    | 47.30681     | 48.9321 |
| 2      | 10.590        | VB   | 0.2358      | 703.41534    | 45.64487     | 48.1732 |
| 3      | 15.018        | MM   | 0.4767      | 20.93322     | 7.31814e-1   | 1.4336  |
| 4      | 17.134        | MM   | 0.5180      | 21.33540     | 6.86443e-1   | 1.4611  |

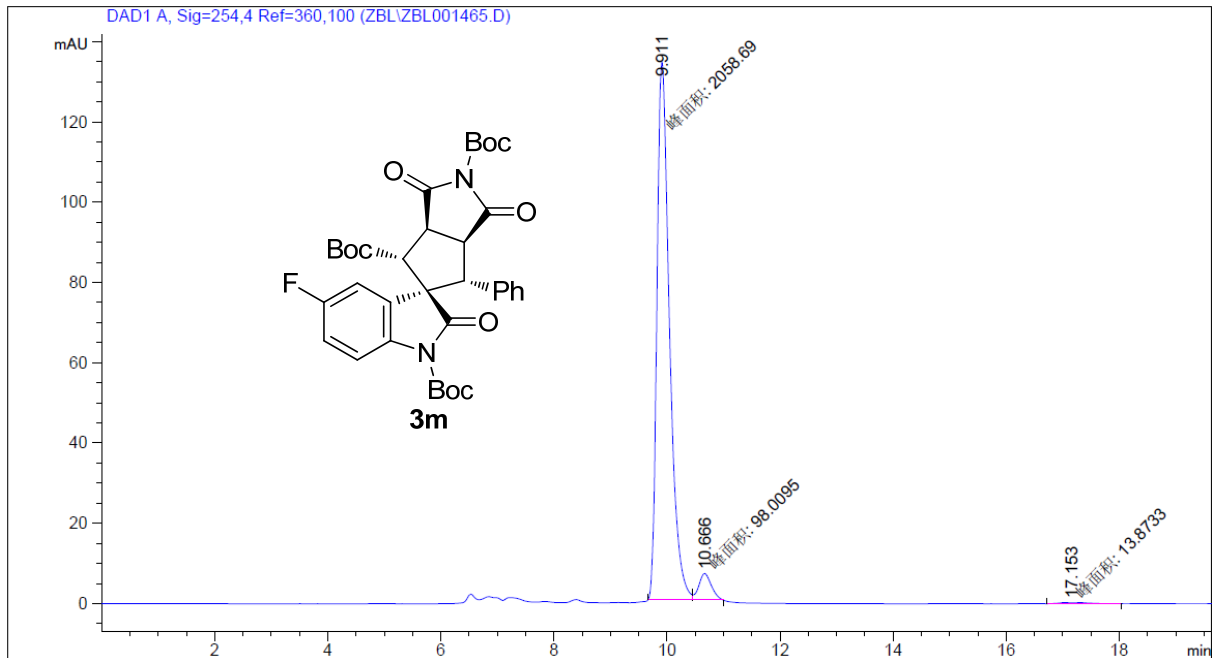

| Peak # | RetTime [min] | Type | Width [min] | Area [mAU*s] | Height [mAU] | Area %  |
|--------|---------------|------|-------------|--------------|--------------|---------|
| 1      | 9.911         | MM   | 0.2561      | 2058.69360   | 134.00322    | 94.8455 |
| 2      | 10.666        | MM   | 0.2520      | 98.00949     | 6.48258      | 4.5154  |
| 3      | 17.153        | MM   | 0.5984      | 13.87329     | 3.86376e-1   | 0.6392  |

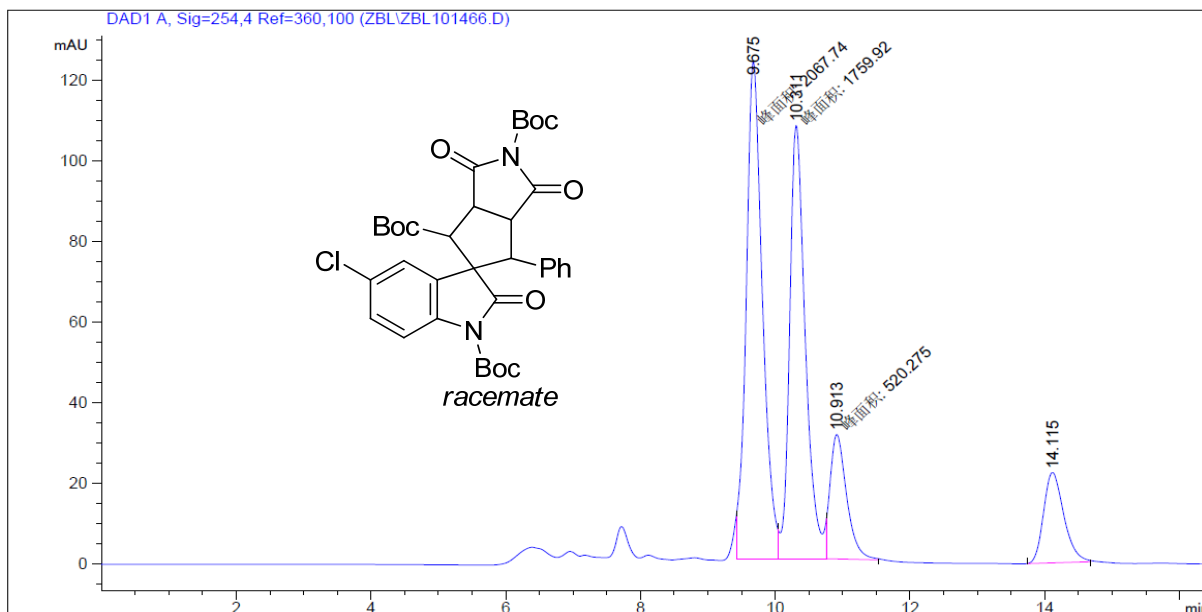

| Peak # | RetTime [min] | Type | Width [min] | Area [mAU*s] | Height [mAU] | Area %  |
|--------|---------------|------|-------------|--------------|--------------|---------|
| 1      | 9.675         | MM   | 0.2796      | 2067.74463   | 123.26939    | 42.9287 |
| 2      | 10.311        | MM   | 0.2730      | 1759.92322   | 107.43500    | 36.5380 |
| 3      | 10.913        | MM   | 0.2812      | 520.27484    | 30.83566     | 10.8015 |
| 4      | 14.115        | BB   | 0.3202      | 468.75577    | 22.39483     | 9.7319  |

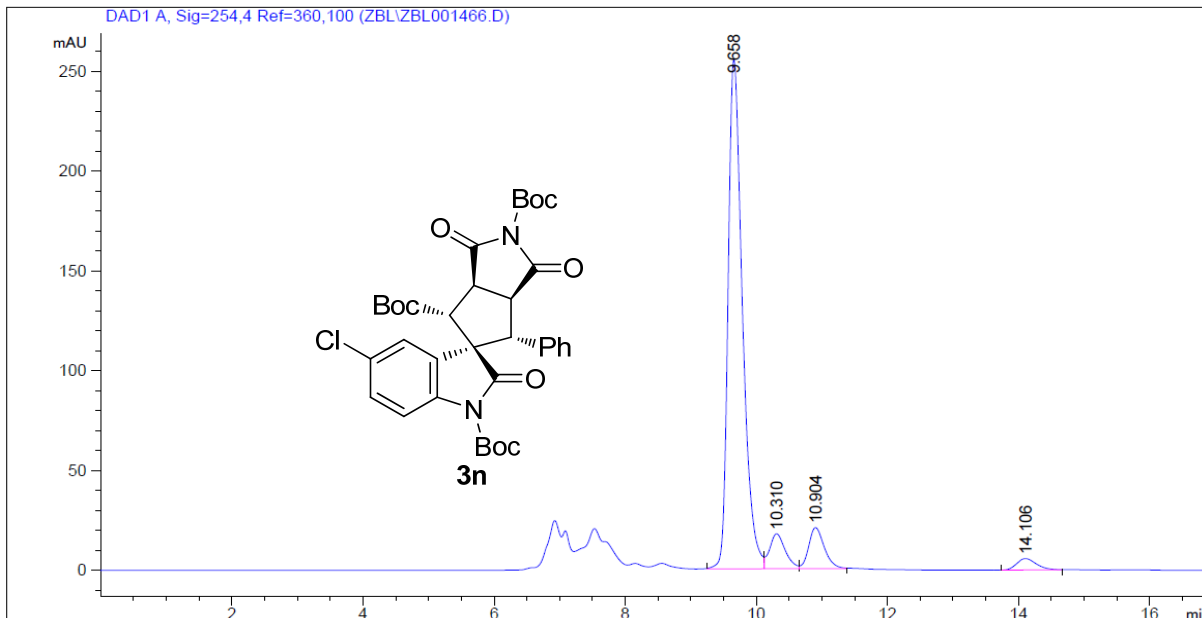

| Peak # | RetTime [min] | Type | Width [min] | Area [mAU*s] | Height [mAU] | Area %  |
|--------|---------------|------|-------------|--------------|--------------|---------|
| 1      | 9.658         | BV   | 0.2312      | 3877.17700   | 255.28909    | 83.7973 |
| 2      | 10.310        | VV   | 0.2475      | 290.80801    | 17.53687     | 6.2852  |
| 3      | 10.904        | VB   | 0.2528      | 339.93564    | 20.57145     | 7.3470  |
| 4      | 14.106        | BB   | 0.3241      | 118.93306    | 5.73049      | 2.5705  |

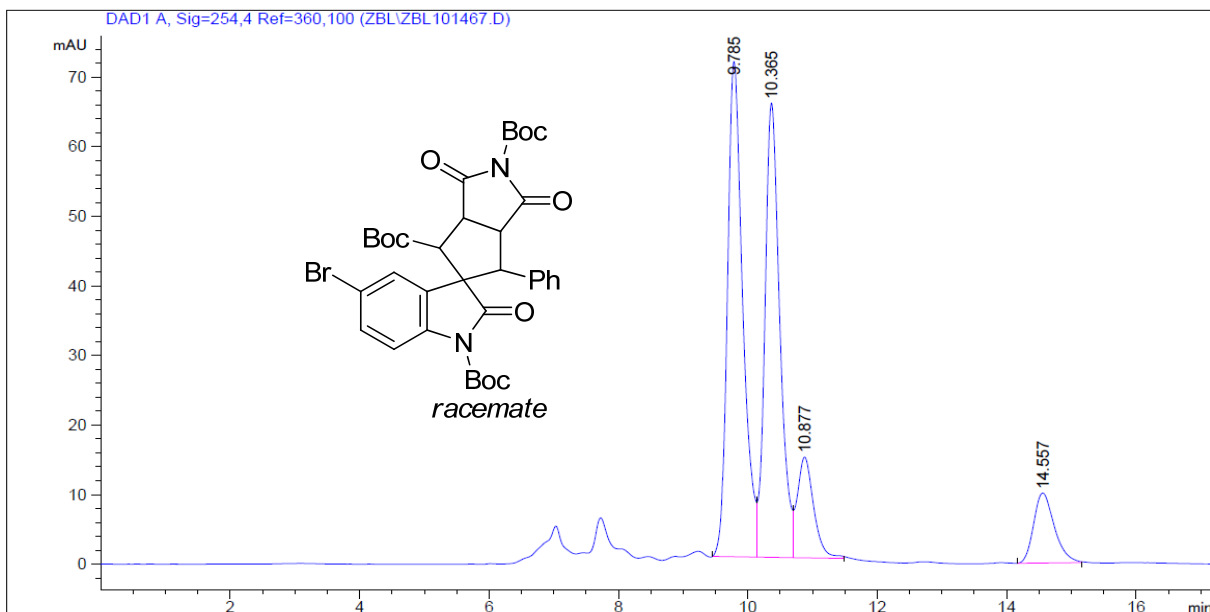

| Peak # | RetTime [min] | Type | Width [min] | Area [mAU*s] | Height [mAU] | Area %  |
|--------|---------------|------|-------------|--------------|--------------|---------|
| 1      | 9.785         | BV   | 0.2481      | 1172.30151   | 71.19570     | 43.4137 |
| 2      | 10.365        | VV   | 0.2413      | 1048.65723   | 65.32318     | 38.8348 |
| 3      | 10.877        | VB   | 0.2600      | 255.60672    | 14.47951     | 9.4659  |
| 4      | 14.557        | BB   | 0.3414      | 223.73715    | 10.06292     | 8.2856  |

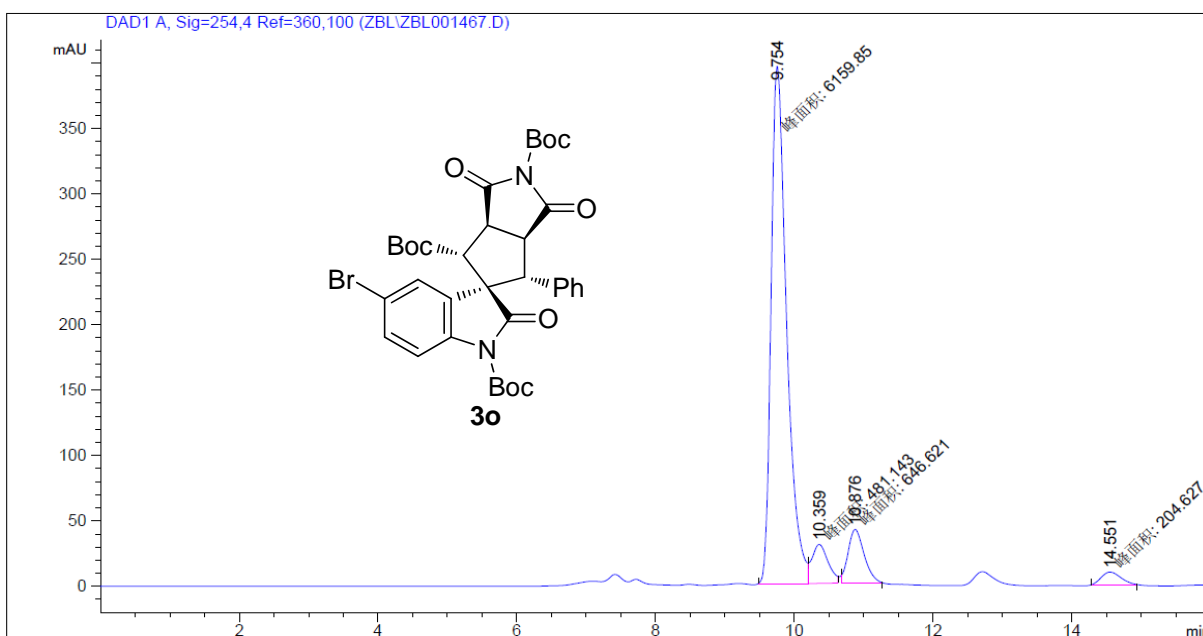

| Peak # | RetTime [min] | Type | Width [min] | Area [mAU*s] | Height [mAU] | Area %  |
|--------|---------------|------|-------------|--------------|--------------|---------|
| 1      | 9.754         | MM   | 0.2594      | 6159.84766   | 395.77359    | 82.2164 |
| 2      | 10.359        | MM   | 0.2691      | 481.14322    | 29.80350     | 6.4219  |
| 3      | 10.876        | MM   | 0.2643      | 646.62097    | 40.78099     | 8.6305  |
| 4      | 14.551        | MM   | 0.3368      | 204.62714    | 10.12600     | 2.7312  |

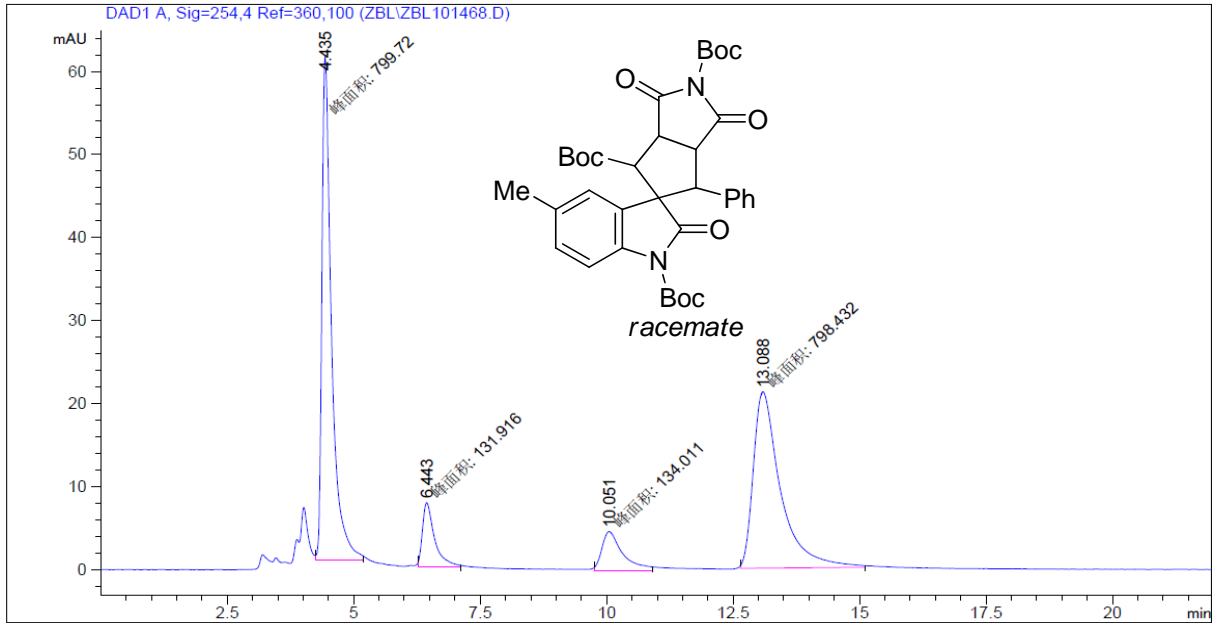

| Peak # | RetTime [min] | Type | Width [min] | Area [mAU*s] | Height [mAU] | Area %  |
|--------|---------------|------|-------------|--------------|--------------|---------|
| 1      | 4.435         | MM   | 0.2198      | 799.71960    | 60.64570     | 42.9016 |
| 2      | 6.443         | MM   | 0.2818      | 131.91553    | 7.80332      | 7.0767  |
| 3      | 10.051        | MM   | 0.4760      | 134.01088    | 4.69260      | 7.1891  |
| 4      | 13.088        | MM   | 0.6257      | 798.43152    | 21.26863     | 42.8325 |

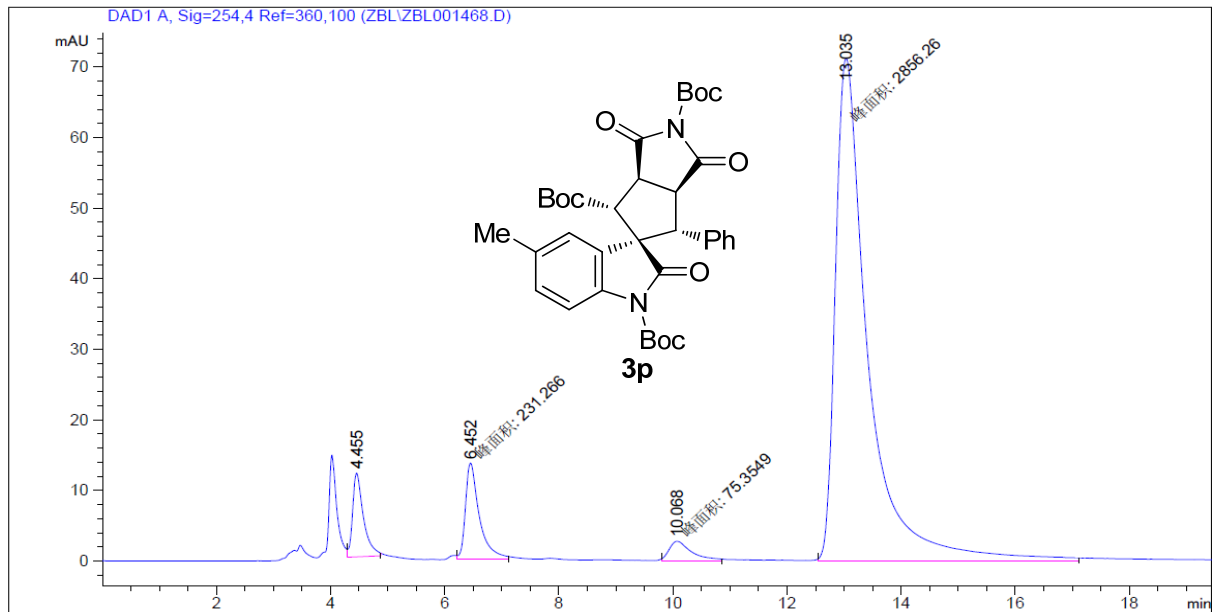

| Peak # | RetTime [min] | Type | Width [min] | Area [mAU*s] | Height [mAU] | Area %  |
|--------|---------------|------|-------------|--------------|--------------|---------|
| 1      | 4.455         | VB   | 0.1948      | 157.47096    | 11.86721     | 4.7426  |
| 2      | 6.452         | MM   | 0.2823      | 231.26558    | 13.65276     | 6.9651  |
| 3      | 10.068        | MM   | 0.4574      | 75.35486     | 2.74583      | 2.2695  |
| 4      | 13.035        | MM   | 0.6674      | 2856.26392   | 71.32452     | 86.0228 |

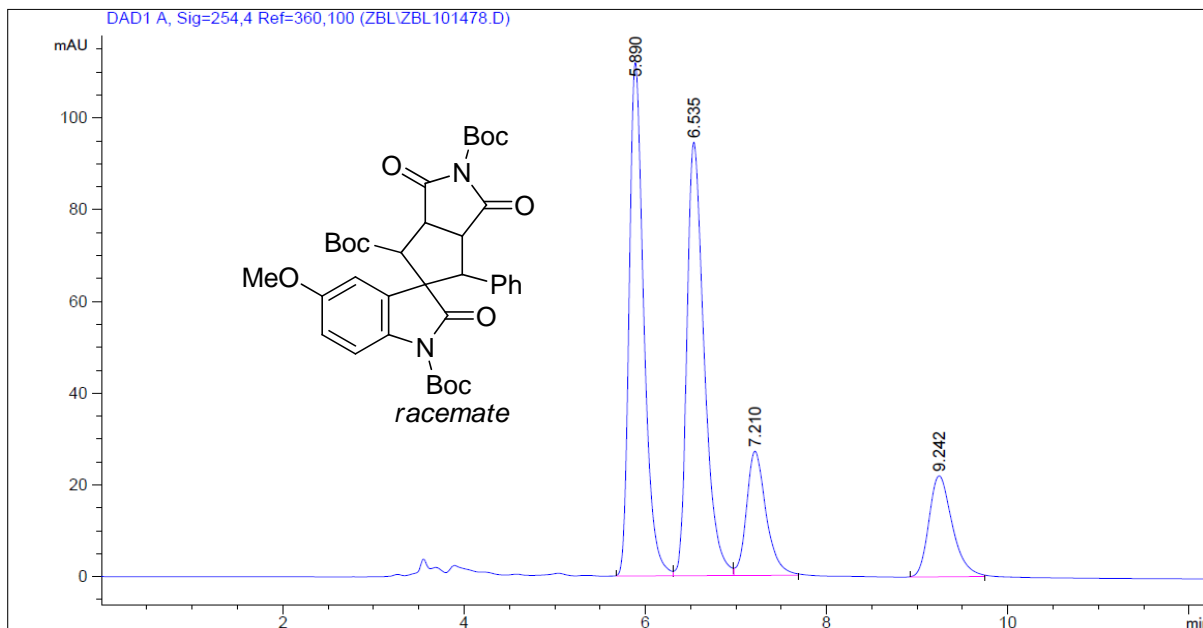

| Peak # | RetTime [min] | Type | Width [min] | Area [mAU*s] | Height [mAU] | Area %  |
|--------|---------------|------|-------------|--------------|--------------|---------|
| 1      | 5.890         | BV   | 0.1703      | 1251.50586   | 112.06731    | 37.8496 |
| 2      | 6.535         | VV   | 0.2026      | 1253.02258   | 94.53667     | 37.8955 |
| 3      | 7.210         | VB   | 0.2276      | 407.69135    | 27.08568     | 12.3299 |
| 4      | 9.242         | BB   | 0.2728      | 394.30139    | 22.03621     | 11.9250 |

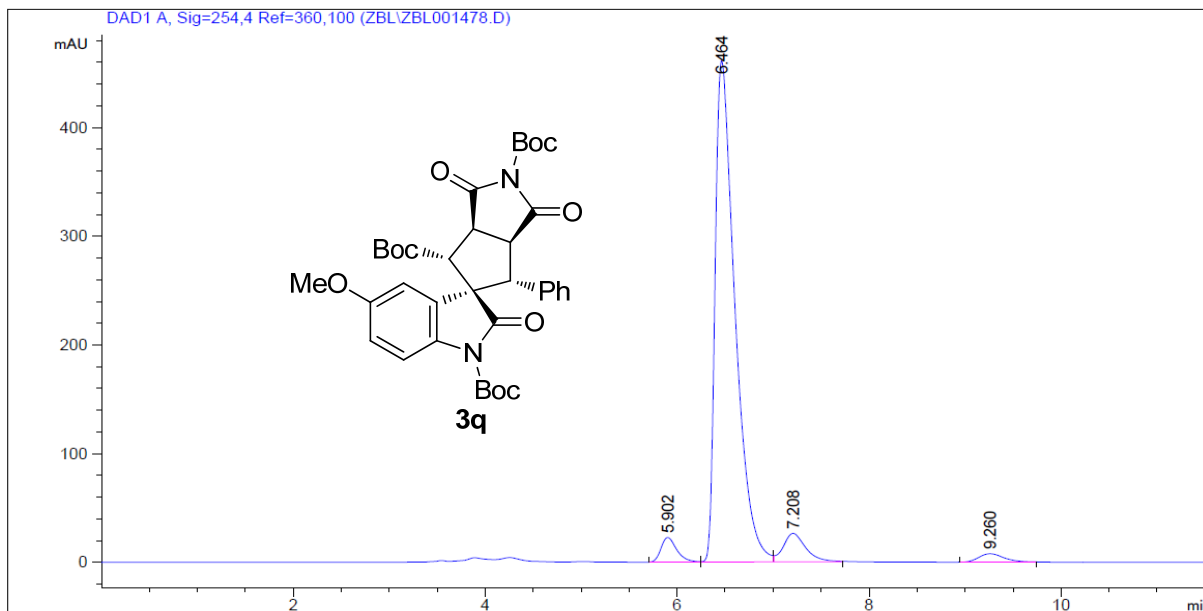

| Peak # | RetTime [min] | Type | Width [min] | Area [mAU*s] | Height [mAU] | Area %  |
|--------|---------------|------|-------------|--------------|--------------|---------|
| 1      | 5.902         | BV   | 0.1731      | 259.55368    | 22.74313     | 3.4906  |
| 2      | 6.464         | VV   | 0.2149      | 6603.91992   | 461.68042    | 88.8139 |
| 3      | 7.208         | VB   | 0.2422      | 427.74597    | 26.23552     | 5.7526  |
| 4      | 9.260         | BB   | 0.2813      | 144.46646    | 7.82749      | 1.9429  |

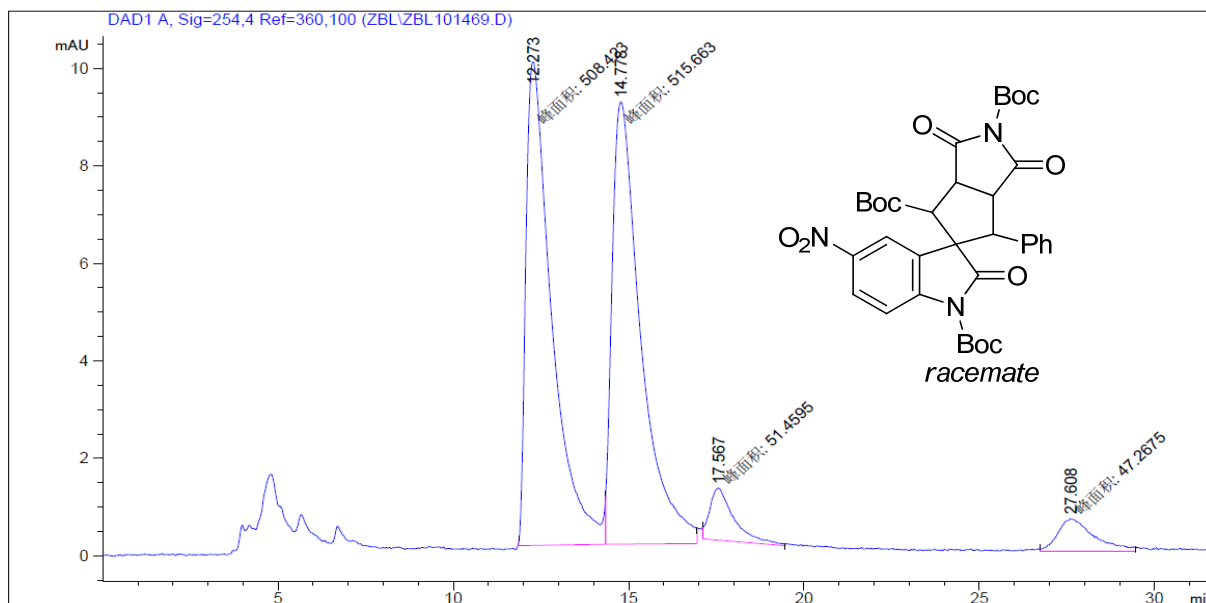

| Peak # | RetTime [min] | Type | Width [min] | Area [mAU*s] | Height [mAU] | Area %  |
|--------|---------------|------|-------------|--------------|--------------|---------|
| 1      | 12.273        | MM   | 0.8540      | 508.42258    | 9.92223      | 45.2812 |
| 2      | 14.778        | MM   | 0.9469      | 515.66272    | 9.07678      | 45.9260 |
| 3      | 17.567        | MM   | 0.8031      | 51.45955     | 1.06792      | 4.5831  |
| 4      | 27.608        | MM   | 1.1846      | 47.26754     | 6.65029e-1   | 4.2097  |

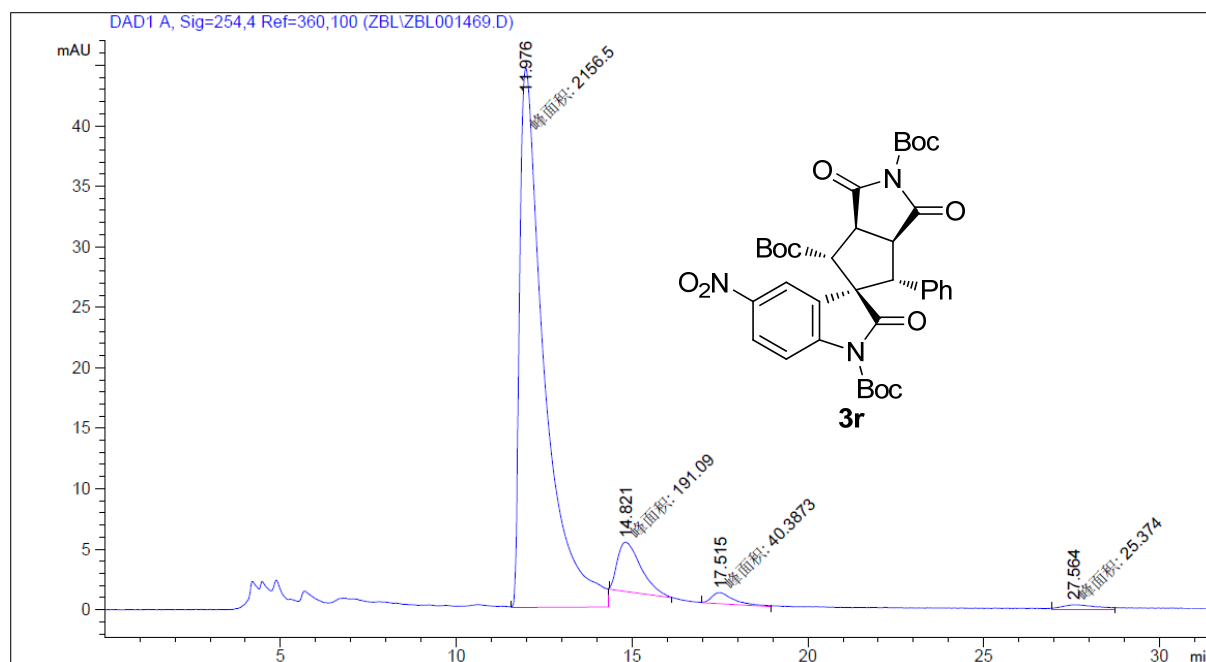

| Peak # | RetTime [min] | Type | Width [min] | Area [mAU*s] | Height [mAU] | Area %  |
|--------|---------------|------|-------------|--------------|--------------|---------|
| 1      | 11.976        | MM   | 0.8058      | 2156.50220   | 44.60376     | 89.3571 |
| 2      | 14.821        | MM   | 0.7797      | 191.09036    | 4.08478      | 7.9180  |
| 3      | 17.515        | MM   | 0.7393      | 40.38726     | 9.10454e-1   | 1.6735  |
| 4      | 27.564        | MM   | 1.1521      | 25.37398     | 3.67081e-1   | 1.0514  |

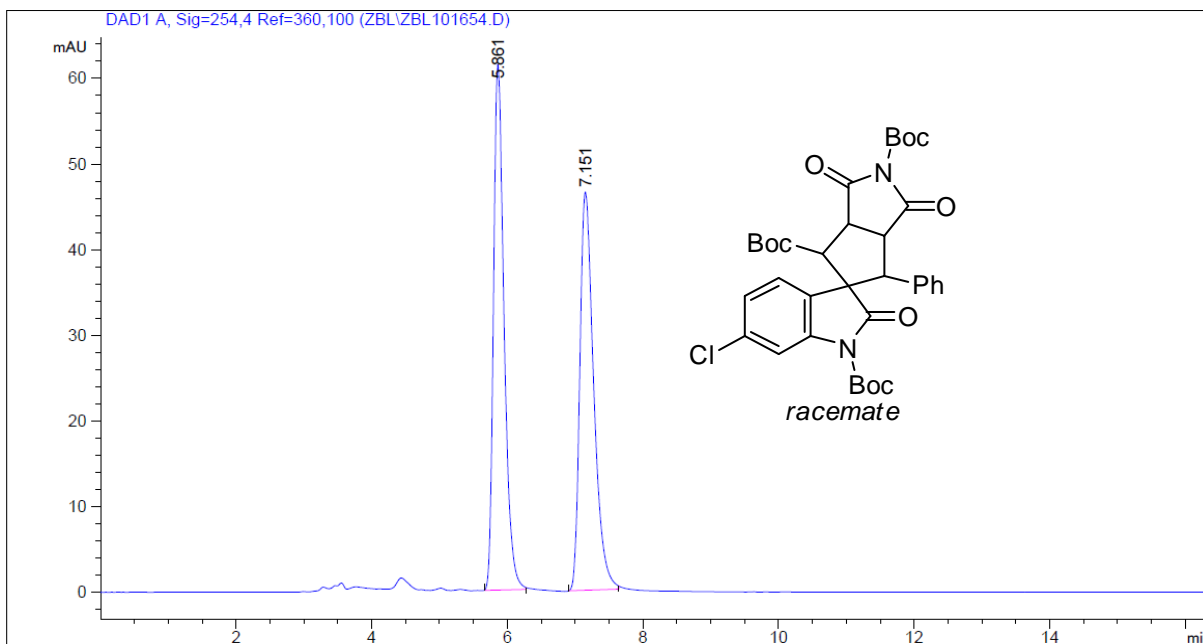

| Peak # | RetTime [min] | Type | Width [min] | Area [mAU*s] | Height [mAU] | Area %  |
|--------|---------------|------|-------------|--------------|--------------|---------|
| 1      | 5.861         | BB   | 0.1663      | 665.45734    | 61.47102     | 50.1889 |
| 2      | 7.151         | BB   | 0.2156      | 660.44757    | 46.53242     | 49.8111 |

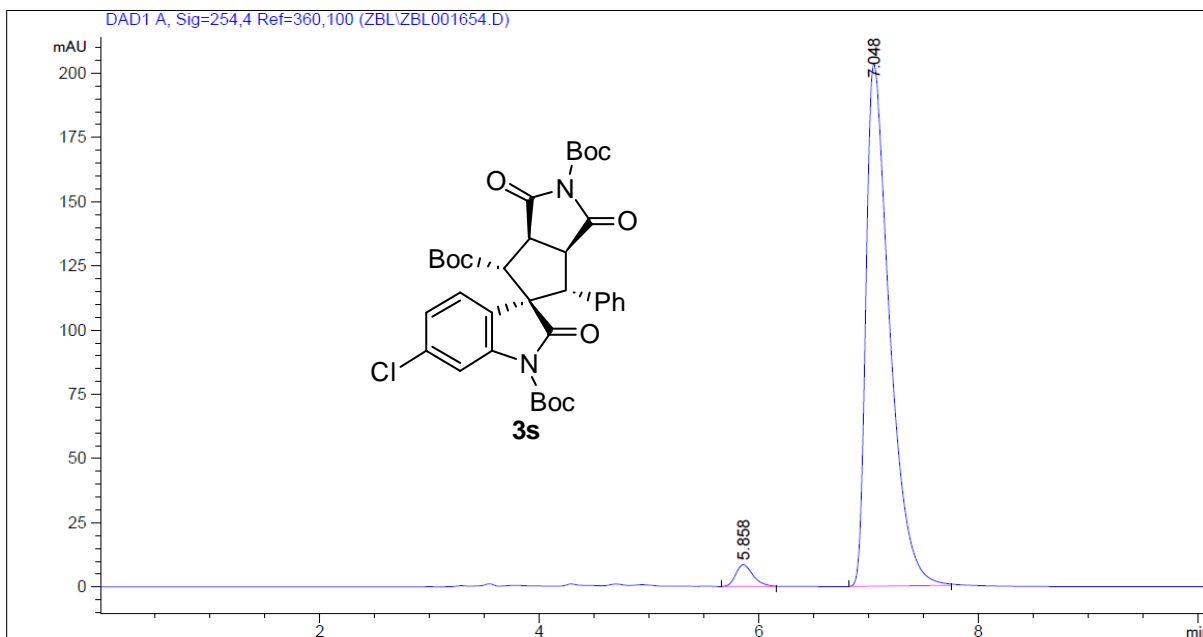

| Peak # | RetTime [min] | Type | Width [min] | Area [mAU*s] | Height [mAU] | Area %  |
|--------|---------------|------|-------------|--------------|--------------|---------|
| 1      | 5.858         | BB   | 0.1680      | 92.90256     | 8.46785      | 2.9710  |
| 2      | 7.048         | BB   | 0.2239      | 3034.02783   | 203.52028    | 97.0290 |

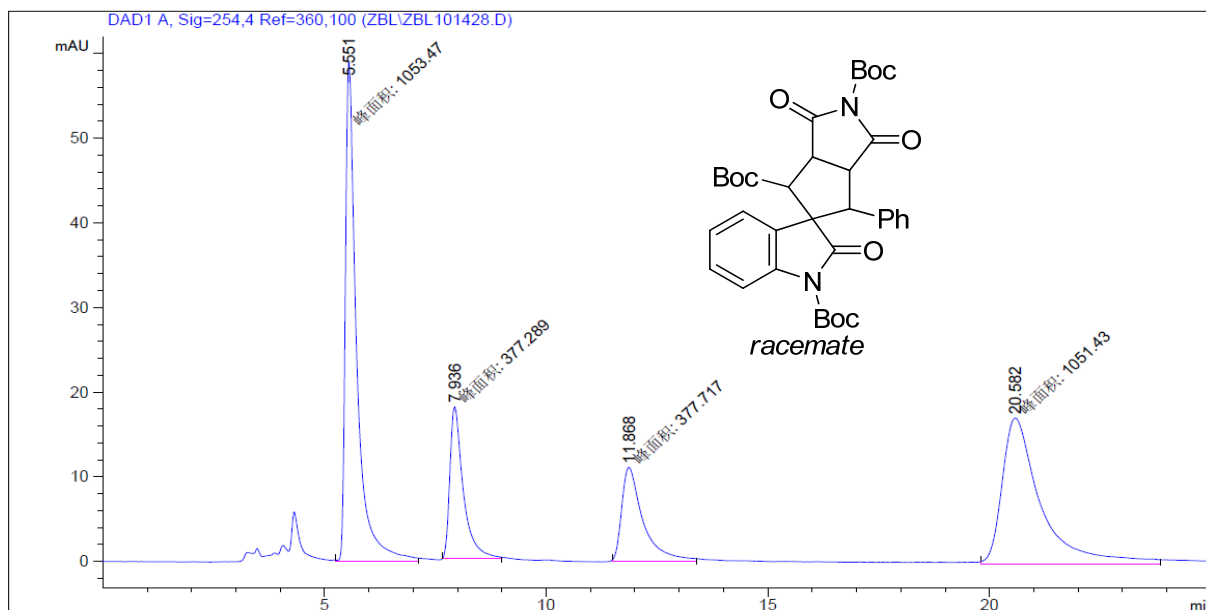

| Peak # | RetTime [min] | Type | Width [min] | Area [mAU*s] | Height [mAU] | Area %  |
|--------|---------------|------|-------------|--------------|--------------|---------|
| 1      | 5.551         | MM   | 0.2973      | 1053.47058   | 59.06449     | 36.8359 |
| 2      | 7.936         | MM   | 0.3506      | 377.28867    | 17.93779     | 13.1924 |
| 3      | 11.868        | MM   | 0.5644      | 377.71701    | 11.15329     | 13.2073 |
| 4      | 20.582        | MM   | 1.0155      | 1051.42859   | 17.25550     | 36.7645 |

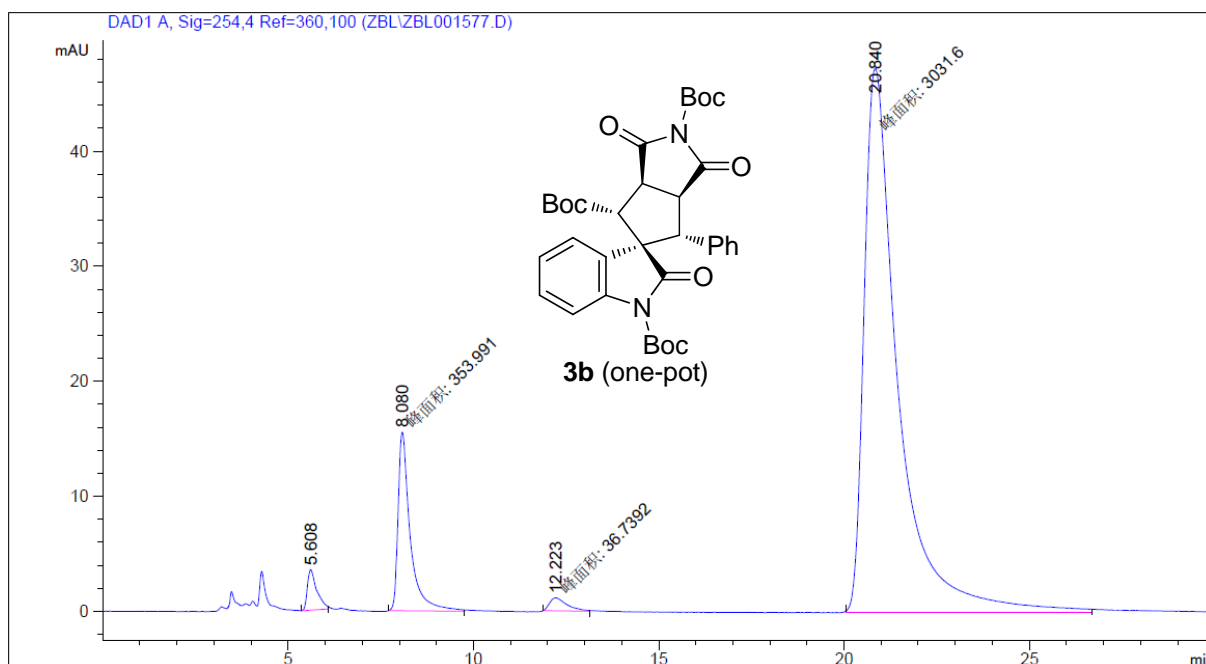

| Peak # | RetTime [min] | Type | Width [min] | Area [mAU*s] | Height [mAU] | Area %  |
|--------|---------------|------|-------------|--------------|--------------|---------|
| 1      | 5.608         | BB   | 0.2529      | 62.01617     | 3.53054      | 1.7799  |
| 2      | 8.080         | MM   | 0.3798      | 353.99088    | 15.53530     | 10.1595 |
| 3      | 12.223        | MM   | 0.5468      | 36.73915     | 1.11986      | 1.0544  |
| 4      | 20.840        | MM   | 1.0669      | 3031.59839   | 47.35625     | 87.0063 |





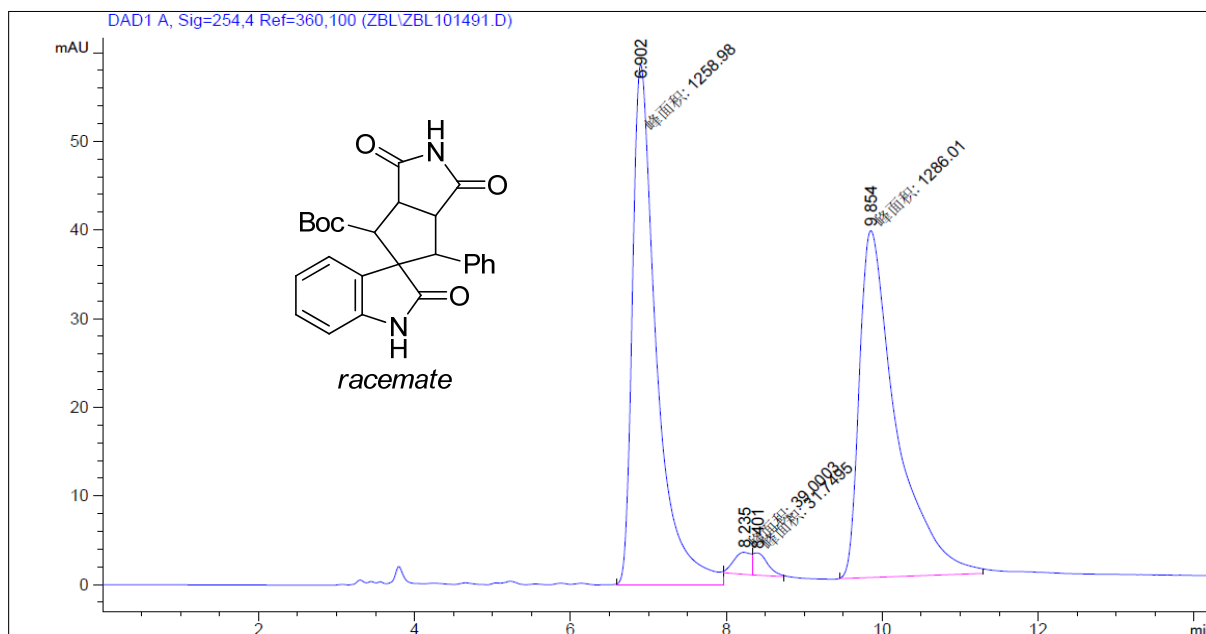

| Peak # | RetTime [min] | Type | Width [min] | Area [mAU*s] | Height [mAU] | Area %  |
|--------|---------------|------|-------------|--------------|--------------|---------|
| 1      | 6.902         | MM   | 0.3574      | 1258.97803   | 58.71751     | 48.1308 |
| 2      | 8.235         | MM   | 0.2618      | 39.00031     | 2.48305      | 1.4910  |
| 3      | 8.401         | MM   | 0.2106      | 31.74947     | 2.51251      | 1.2138  |
| 4      | 9.854         | MM   | 0.5479      | 1286.01355   | 39.11625     | 49.1644 |

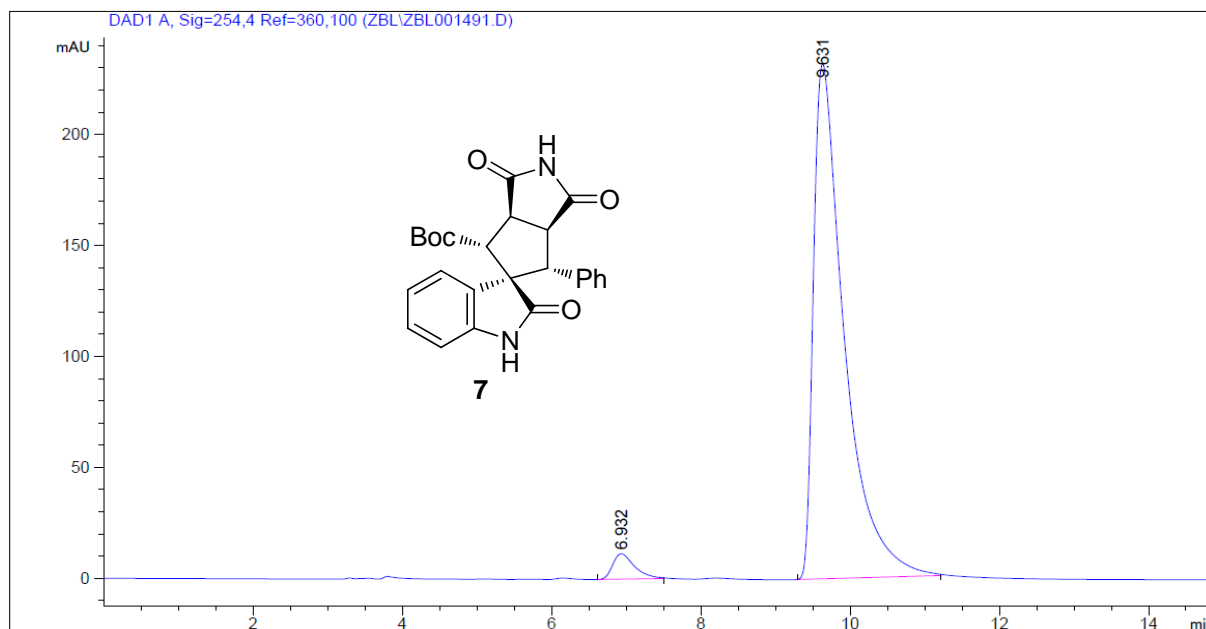

| Peak # | RetTime [min] | Type | Width [min] | Area [mAU*s] | Height [mAU] | Area %  |
|--------|---------------|------|-------------|--------------|--------------|---------|
| 1      | 6.932         | BB   | 0.3034      | 233.59752    | 11.47968     | 3.3738  |
| 2      | 9.631         | BB   | 0.4203      | 6690.28223   | 232.12482    | 96.6262 |

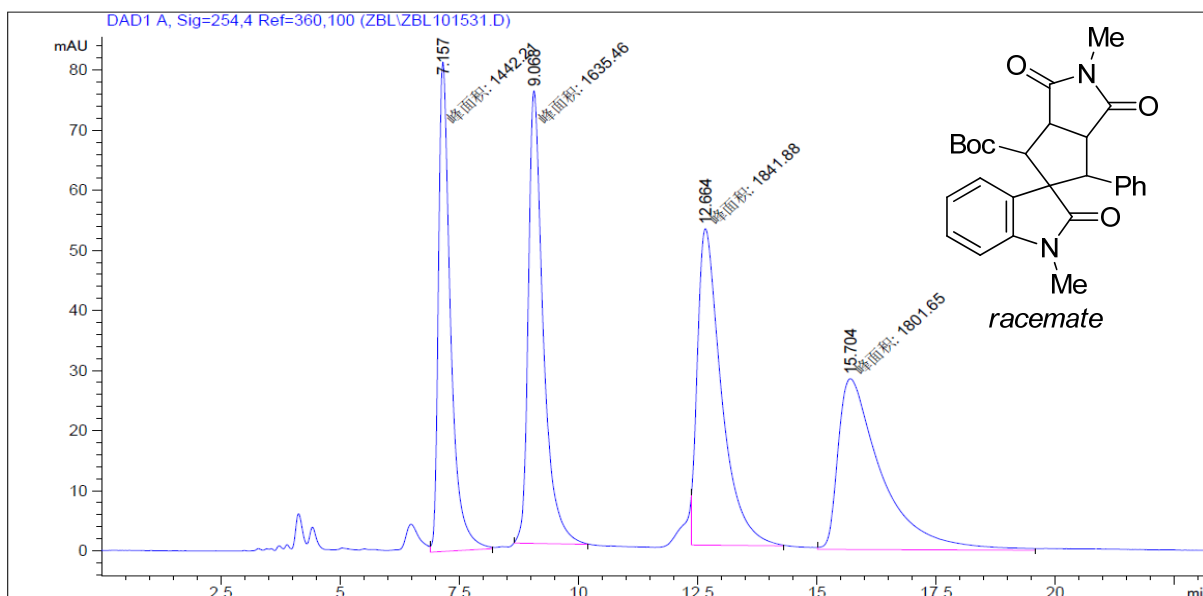

| Peak # | RetTime [min] | Type | Width [min] | Area [mAU*s] | Height [mAU] | Area %  |
|--------|---------------|------|-------------|--------------|--------------|---------|
| 1      | 7.157         | MM   | 0.2949      | 1442.21118   | 81.51088     | 21.4576 |
| 2      | 9.068         | MM   | 0.3617      | 1635.46191   | 75.35751     | 24.3329 |
| 3      | 12.664        | MM   | 0.5827      | 1841.87891   | 52.68142     | 27.4040 |
| 4      | 15.704        | MM   | 1.0561      | 1801.65479   | 28.43256     | 26.8055 |

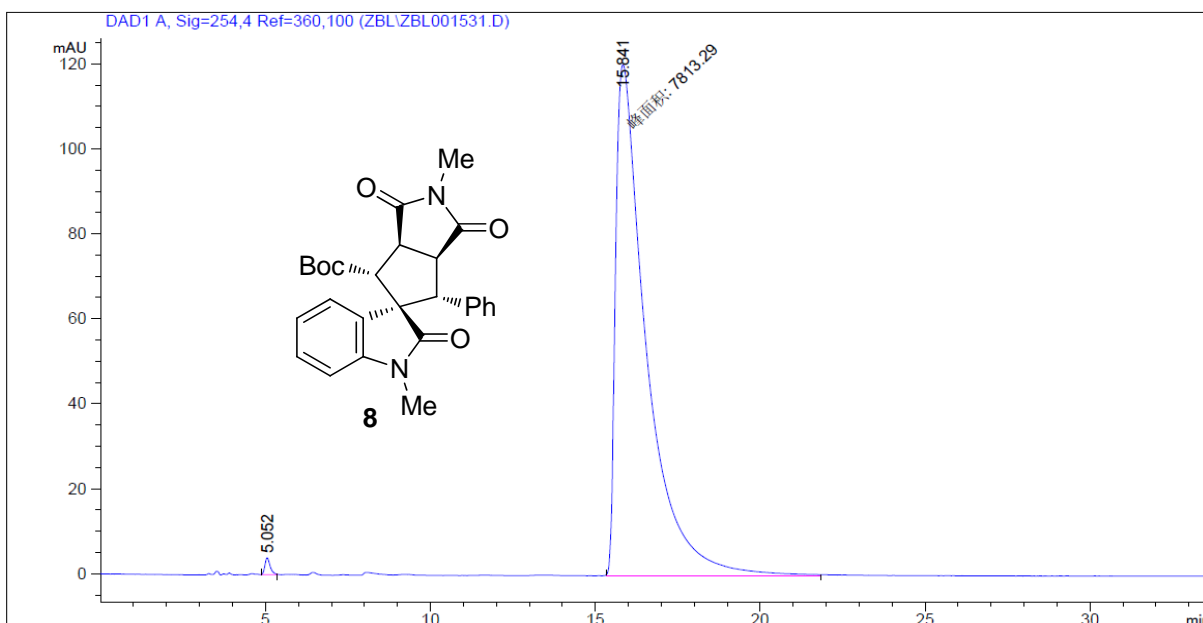

| Peak # | RetTime [min] | Type | Width [min] | Area [mAU*s] | Height [mAU] | Area %  |
|--------|---------------|------|-------------|--------------|--------------|---------|
| 1      | 5.052         | BB   | 0.1704      | 44.32750     | 3.96720      | 0.5641  |
| 2      | 15.841        | MM   | 1.0809      | 7813.28809   | 120.47459    | 99.4359 |

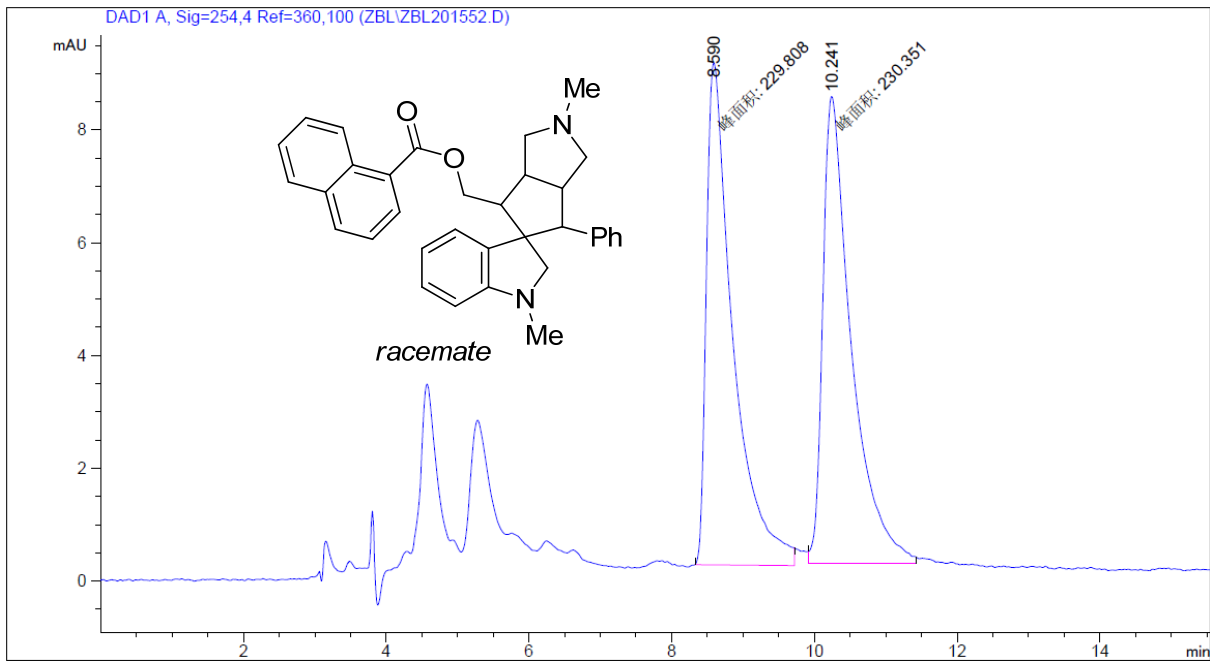

| Peak # | RetTime [min] | Type | Width [min] | Area [mAU*s] | Height [mAU] | Area %  |
|--------|---------------|------|-------------|--------------|--------------|---------|
| 1      | 8.590         | MM   | 0.4300      | 229.80838    | 8.90787      | 49.9410 |
| 2      | 10.241        | MM   | 0.4639      | 230.35092    | 8.27609      | 50.0590 |

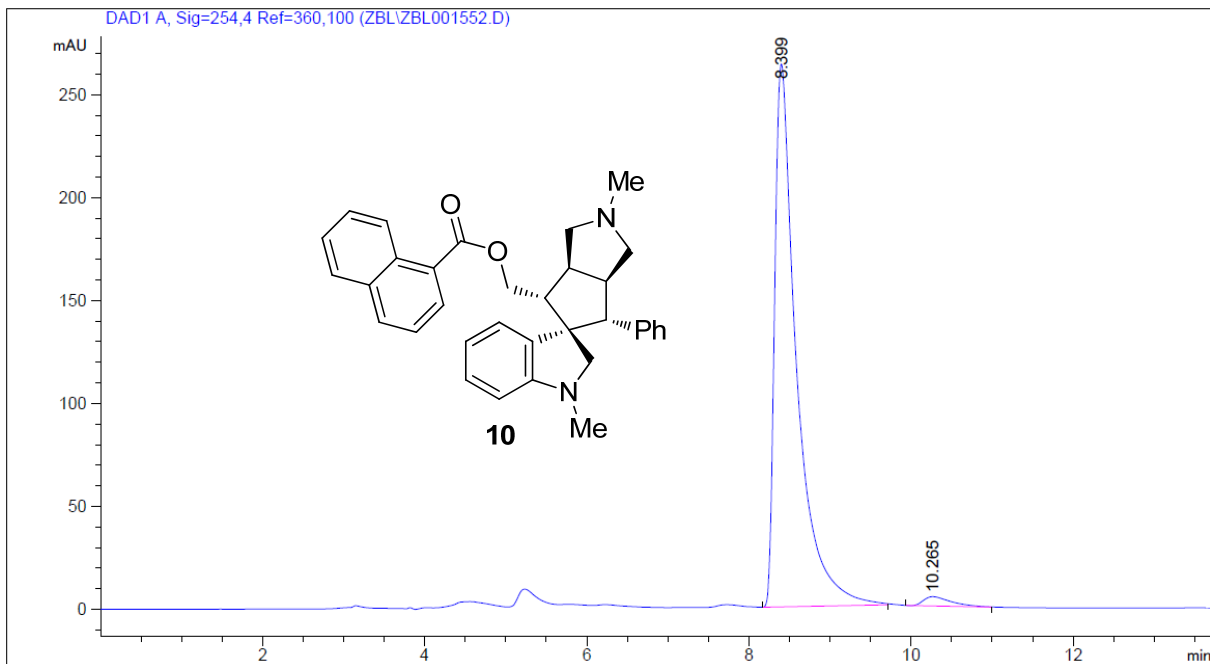

| Peak # | RetTime [min] | Type | Width [min] | Area [mAU*s] | Height [mAU] | Area %  |
|--------|---------------|------|-------------|--------------|--------------|---------|
| 1      | 8.399         | BB   | 0.2709      | 4949.63135   | 263.84717    | 97.8904 |
| 2      | 10.265        | BB   | 0.3470      | 106.66554    | 4.52505      | 2.1096  |
